# Supplementary material for: CELF RNA binding proteins promote axon regeneration in C. elegans and mammals through alternative splicing of Syntaxins
Source: eLife. 2016 Jun 2;5:e16072. doi: 10.7554/eLife.16072 (PMC4946901; doi:10.7554/eLife.16072)
Supplement: Supplementary file 1. — DOI: http://dx.doi.org/10.7554/eLife.16072.022 [file elife-16072-supp1.xlsx]

## Sheet: 533 UNC-75 targets
Chrom	Strand	gene name
chrI	-	abt-2
chrV	-	abt-4
chrI	-	abts-1
chrX	-	acl-4
chrV	+	acl-6
chrV	+	acl-8
chrIII	+	aco-2
chrV	-	acr-18
chrI	-	acr-19
chrX	+	acs-22
chrI	-	aex-5
chrI	-	aex-6
chrI	+	afd-1
chrI	-	agef-1
chrII	-	agr-1
chrX	-	ags-3
chrIII	+	akap-1
chrV	-	alh-5
chrII	-	alh-6
chrIV	+	amt-2
chrV	-	angl-1
chrI	+	apg-1
chrV	+	aps-1
chrX	+	aqp-7
chrIV	-	ark-1
chrIII	+	arrd-15
chrII	-	arrd-4
chrII	+	arrd-5
chrX	-	asp-4
chrI	-	atg-4.1
chrIV	+	atic-1
chrV	-	atl-1
chrI	+	atm-1
chrIII	+	atp-2
chrV	-	atp-5
chrIII	-	attf-3
chrX	+	attf-5
chrIII	+	atx-2
chrV	-	atx-3
chrIII	+	bas-1
chrIV	-	bec-1
chrIII	-	bed-2
chrIV	-	best-6
chrI	+	bli-4
chrIII	-	bre-3
chrII	+	btb-16
chrII	+	btbd-10
chrX	-	cab-1
chrX	-	cas-1
chrX	-	cat-1
chrIV	-	catp-8
chrX	-	cca-1
chrIV	-	ccg-1
chrII	-	cdc-48.1
chrIV	-	cdgs-1
chrIII	-	cdh-3
chrI	+	cdk-8
chrV	-	cdr-6
chrIV	-	ced-3
chrX	-	ceh-18
chrIII	+	ceh-20
chrIII	-	ceh-43
chrIV	+	cfim-2
chrIII	-	cgh-1
chrX	-	cgr-1
chrI	-	cil-7
chrIII	+	ckb-2
chrIII	+	ckk-1
chrX	-	clc-3
chrI	+	clec-112
chrIII	+	clec-159
chrV	-	clec-29
chrII	-	clh-1
chrII	+	clh-2
chrIII	-	clp-4
chrII	-	clpp-1
chrIV	-	cng-3
chrIII	+	cnt-2
chrI	+	cogc-1
chrI	+	cogc-3
chrIII	+	cpar-1
chrX	+	cpd-2
chrIV	-	cpsf-1
chrIV	+	cpt-2
chrIV	+	csn-3
chrIII	-	cts-1
chrV	-	cutl-4
chrII	+	cyd-1
chrI	+	cye-1
chrIV	+	daf-15
chrII	-	daf-19
chrI	+	daf-25
chrX	-	daf-3
chrI	+	dapk-1
chrX	+	dct-1
chrX	+	ddr-2
chrX	+	deg-1
chrII	-	dep-1
chrI	+	dhhc-2
chrIII	+	dhhc-8
chrII	-	din-1
chrIV	+	dld-1
chrV	-	dlst-1
chrIV	+	dml-1
chrI	+	dmsr-2
chrV	+	dop-2
chrI	+	duox-2
chrIV	+	ebax-1
chrV	-	eea-1
chrV	+	eef-1G
chrI	+	eef-2
chrIV	-	eel-1
chrI	+	eft-2
chrII	-	egg-3
chrX	+	egl-15
chrIV	+	egl-4
chrV	+	egl-8
chrIII	+	elf-1
chrIV	+	elo-1
chrIII	+	elpc-2
chrIII	-	epg-6
chrIV	+	epi-1
chrX	-	epn-1
chrIV	+	eps-8
chrV	+	ergo-1
chrI	-	erm-1
chrIV	-	ethe-1
chrIII	-	evl-18
chrIV	+	exos-2
chrIV	-	fbxa-215
chrII	-	fbxb-90
chrV	-	fib-1
chrX	+	fipr-21
chrIV	-	flp-13
chrX	-	flp-18
chrV	-	fre-1
chrI	-	frm-1
chrI	-	frm-4
chrIV	-	frm-5.1
chrV	+	frm-7
chrX	-	frm-9
chrIV	-	frpr-19
chrV	-	fut-8
chrI	-	gap-3
chrIII	+	gar-2
chrV	+	gasr-8
chrI	+	gcy-28
chrII	-	gcy-5
chrIII	-	gei-4
chrI	+	gfi-2
chrII	+	ggr-1
chrI	+	glb-18
chrI	-	glc-2
chrI	+	glh-2
chrIII	+	glp-1
chrIII	-	glr-1
chrIII	-	glr-2
chrX	+	glt-4
chrIV	+	gon-4
chrI	-	gopc-1
chrX	+	got-2.2
chrV	-	gpa-1
chrII	+	gpa-11
chrIV	+	gpa-7
chrII	-	gpb-1
chrX	-	gpd-2
chrIV	-	grld-1
chrI	+	gsa-1
chrII	+	gst-13
chrX	+	hda-4
chrI	+	herc-1
chrI	-	hgo-1
chrX	+	him-4
chrV	-	his-4
chrIV	-	his-46
chrI	+	his-68
chrI	-	hlh-2
chrX	+	hlh-8
chrIV	-	hmg-5
chrV	+	hot-1
chrV	+	hot-2
chrI	-	hpo-11
chrIII	-	hpo-28
chrIII	+	hpo-29
chrIV	-	hrp-1
chrIV	+	hsp-1
chrIII	+	hsp-60
chrIII	-	hum-5
chrI	-	hum-7
chrIV	+	iars-1
chrIII	+	ida-1
chrI	+	idhg-2
chrX	-	ifa-4
chrIII	+	iffb-1
chrX	-	igcm-3
chrI	-	impt-1
chrI	-	inx-19
chrII	-	ipla-1
chrII	-	ire-1
chrX	-	irk-2
chrX	-	irk-3
chrV	-	irld-16
chrX	-	irld-2
chrV	+	irld-62
chrII	-	irld-65
chrIV	+	itsn-1
chrIV	+	JC8.7
chrII	+	jip-1
chrII	+	kel-1
chrI	+	kin-1
chrI	+	kin-32
chrIV	+	kin-4
chrII	+	klf-3
chrIII	+	knl-1
chrIII	+	kvs-4
chrII	-	laat-1
chrII	-	lact-3
chrIII	-	larp-1
chrII	-	lec-2
chrII	+	lec-3
chrX	-	let-2
chrIII	+	let-756
chrIII	+	lgc-37
chrX	-	lgl-1
chrIII	+	lim-8
chrX	+	lin-14
chrX	-	lin-2
chrII	+	lin-23
chrII	+	lin-26
chrII	-	lin-29
chrIV	+	lin-33
chrI	-	lin-41
chrII	+	lin-5
chrII	+	lin-8
chrII	+	lir-2
chrIII	+	lit-1
chrV	-	lmd-3
chrV	+	lmd-5
chrX	-	lmp-1
chrV	-	lon-8
chrI	+	lrp-1
chrIV	+	lst-3
chrV	-	madd-2
chrIII	-	madf-11
chrX	-	mai-1
chrII	+	math-41
chrIII	+	mcm-10
chrIII	+	mcm-6
chrV	-	mct-1
chrIV	-	mdf-2
chrII	+	mdt-26
chrII	-	mdt-8
chrX	+	mec-2
chrII	-	men-1
chrII	+	mig-14
chrII	+	mix-1
chrIV	+	mltn-12
chrV	+	mltn-6
chrII	+	mltn-9
chrIII	-	mml-1
chrV	+	mms-19
chrII	-	mnk-1
chrII	-	moe-3
chrV	+	mom-2
chrIII	-	morc-1
chrII	-	mpz-1
chrX	-	mrp-1
chrIII	+	mrpl-12
chrIII	+	mrpl-18
chrIII	+	mrpl-32
chrI	+	mrpl-47
chrIV	+	msh-5
chrI	+	msh-6
chrII	-	mthf-1
chrIII	-	mup-4
chrV	-	mys-1
chrX	+	nas-39
chrIII	+	ncl-1
chrII	-	ncs-6
chrIII	-	ndg-4
chrIV	+	nhr-105
chrV	+	nhr-37
chrIV	-	nhr-46
chrX	+	nhr-91
chrI	+	nkb-1
chrIII	-	nlp-10
chrIII	-	nlp-21
chrV	+	nlp-31
chrX	+	nlp-6
chrV	+	noca-1
chrII	-	nol-6
chrI	+	npp-11
chrI	-	npp-2
chrI	-	npp-4
chrIV	-	npp-8
chrI	+	npr-14
chrIV	-	npr-2
chrX	+	npr-8
chrIV	+	nrfl-1
chrV	+	nrx-1
chrIV	-	nstp-6
chrIII	+	ntl-9
chrII	-	oac-11
chrV	+	odr-2
chrV	-	oig-6
chrIII	+	orc-1
chrIV	+	ost-1
chrII	+	ostb-1
chrI	+	oxa-1
chrI	-	pab-1
chrIII	+	pac-1
chrX	-	pak-1
chrIII	-	pat-12
chrX	+	pbo-4
chrII	+	pde-3
chrIII	-	pdhk-2
chrX	-	pek-1
chrI	+	pept-3
chrIV	-	perm-4
chrIII	-	pes-4
chrX	+	pfk-1.1
chrI	+	pfkb-1.1
chrI	+	pgal-1
chrV	+	pgl-3
chrIII	+	phf-15
chrIII	-	pho-9
chrIII	+	pie-1
chrII	-	pinn-1
chrX	+	pix-1
chrX	-	plc-1
chrIV	+	plx-1
chrI	-	ppfr-1
chrII	+	pqn-48
chrIV	+	pqn-55
chrX	+	pqn-62
chrIII	+	pqn-82
chrII	-	pqn-87
chrIII	+	pssy-2
chrII	-	ptr-13
chrV	+	pud-4
chrI	+	pyk-1
chrIV	-	pyp-1
chrIV	+	qui-1
chrII	-	rab-3
chrI	+	rab-5
chrV	+	rad-50
chrX	+	ram-5
chrIII	-	rbc-2
chrX	+	ref-2
chrV	-	ret-1
chrV	-	rga-4
chrIV	+	rga-5
chrX	+	rig-3
chrIV	-	rig-4
chrIII	+	rimb-1
chrIII	+	rle-1
chrIII	-	rnr-1
chrV	-	rol-3
chrI	+	rpa-2
chrV	+	rpac-40
chrIII	-	rpl-23
chrI	+	rpl-24.1
chrI	-	rpl-4
chrII	+	rpl-5
chrIII	+	rpl-6
chrI	-	rpom-1
chrX	+	rsd-3
chrII	+	rsp-7
chrI	-	rsy-1
chrV	-	saeg-1
chrIII	-	sbp-1
chrIII	-	scav-3
chrII	-	scl-15
chrI	-	scpl-1
chrV	+	scpl-4
chrII	-	sdz-11
chrII	-	sec-5
chrIII	-	sel-2
chrIII	-	sel-8
chrI	-	sem-2
chrI	-	set-10
chrI	+	set-18
chrI	+	set-29
chrII	+	shc-2
chrI	+	sin-3
chrIV	-	skn-1
chrII	-	skpo-2
chrII	+	sls-2.1
chrII	+	smc-5
chrIV	+	smgl-2
chrV	+	smk-1
chrIV	-	sms-1
chrI	+	smu-1
chrII	+	smu-2
chrV	-	snf-11
chrII	+	snf-3
chrIV	+	snf-9
chrI	+	snrp-27
chrII	+	sop-2
chrII	+	spat-1
chrX	-	spat-3
chrX	-	spc-1
chrI	-	spe-9
chrV	-	spn-4
chrIV	+	sprr-3
chrIV	+	sqst-1
chrII	+	srap-1
chrV	+	srbc-59
chrI	+	src-1
chrII	-	sre-13
chrV	-	srh-192
chrV	+	srh-264
chrII	+	srh-27
chrI	-	sri-16
chrI	+	sri-17
chrV	+	sri-25
chrII	-	sri-54
chrV	-	srj-19
chrIV	+	srsx-25
chrIV	-	srv-16
chrV	+	srw-101
chrV	+	srw-124
chrII	+	srw-60
chrII	+	srx-118
chrX	+	srxa-9
chrIII	+	ssl-1
chrX	-	ssr-2
chrII	-	stg-1
chrX	-	sto-2
chrX	+	sto-4
chrIV	-	str-185
chrV	+	str-260
chrIII	-	such-1
chrIII	-	sup-26
chrI	-	sur-2
chrIV	+	svh-1
chrI	+	swah-1
chrIII	-	swt-4
chrV	+	swt-5
chrX	-	sym-4
chrIII	-	tag-250
chrX	-	tag-275
chrIII	-	tag-310
chrV	-	tag-333
chrIII	+	tag-340
chrX	-	tag-343
chrX	+	tag-53
chrI	+	tag-96
chrX	-	tag-97
chrIII	-	tat-3
chrIV	-	tax-6
chrI	+	tba-6
chrX	-	tbc-12
chrII	-	tbc-14
chrIII	+	ten-1
chrIV	+	tftc-1
chrV	+	tgt-2
chrII	-	tiar-1
chrI	+	tln-1
chrV	-	tni-3
chrX	-	toca-1
chrII	+	toe-1
chrI	+	tom-1
chrII	+	top-2
chrII	-	tpi-1
chrII	+	tps-2
chrIV	-	trcs-1
chrI	-	trpp-8
chrII	-	tsr-1
chrIV	+	ttll-11
chrV	-	ttn-1
chrV	-	twk-13
chrX	+	twk-21
chrII	-	twk-5
chrIII	-	twk-7
chrIII	+	tyr-1
chrX	-	tyra-2
chrIV	-	uba-1
chrIII	+	ubc-20
chrIII	+	ubl-1
chrI	+	ubql-1
chrI	-	ubr-5
chrIV	-	ufd-1
chrIV	+	ugt-52
chrIII	-	ugtp-1
chrII	+	unc-104
chrX	+	unc-115
chrI	-	unc-15
chrIII	+	unc-16
chrX	-	unc-2
chrIV	+	unc-31
chrIII	+	unc-32
chrIV	+	unc-33
chrV	-	unc-41
chrIV	+	unc-44
chrIII	+	unc-49
chrI	-	unc-54
chrV	+	unc-60
chrV	+	unc-62
chrIII	+	unc-64
chrX	-	unc-7
chrV	+	unc-70
chrI	+	unc-75
chrIV	+	unc-82
chrIII	-	upp-1
chrII	+	vab-1
chrX	-	vav-1
chrI	-	vbh-1
chrX	+	vha-12
chrIV	+	vha-8
chrI	+	viln-1
chrX	+	vit-1
chrX	+	vit-2
chrX	-	vit-4
chrX	+	vit-5
chrIV	+	vit-6
chrII	+	wago-11
chrIV	+	wdfy-3
chrV	-	wdr-20
chrIII	+	wdr-48
chrIII	+	xbp-1
chrII	+	xrn-1
chrI	+	zfh-2
chrIII	+	zfp-1
chrI	-	zhp-3
chrIII	+	zig-8
chrIII	+	zip-2
chrII	-	zip-3
chrI	-	ztf-11
chrV	+	ztf-12
chrII	-	ztf-22
chrI	-	ztf-3
chrIII	-	ztf-8
