# Supplementary material for: CELF RNA binding proteins promote axon regeneration in C. elegans and mammals through alternative splicing of Syntaxins
Source: eLife. 2016 Jun 2;5:e16072. doi: 10.7554/eLife.16072 (PMC4946901; doi:10.7554/eLife.16072)
Supplement: Supplementary file 4. — The top 2919 CLIP-seq peaks are ranked by significance score. DOI: http://dx.doi.org/10.7554/eLife.16072.025 [file elife-16072-supp4.xlsx]

## Sheet: CELF2 CLIPseq
Chromosome	nt Start	nt End	Score	Strand	GeneID	GeneSymbol
chr17	56768578	56768694	83.6493	+	ENSMUSG00000007603	Dus3l
chr6	122339252	122339489	69.4573	-	ENSMUSG00000040669	Phc1
chr11	5977979	5978085	66.7254	-	ENSMUSG00000057897	Camk2b
chr5	146834804	146834910	65.6093	+	ENSMUSG00000041453	Rpl21
chr7	23946689	23946852	65.0574	-	ENSMUSG00000066724	Gm10175
chr19	23357429	23357603	63.1351	-	ENSMUSG00000033207	Mamdc2
chr8	3599141	3599303	62.7342	+	ENSMUSG00000044433	Camsap3
chr17	33960502	33960608	62.0715	+	ENSMUSG00000024319	Vps52
chr15	89187066	89187202	60.7296	-	ENSMUSG00000015377	Dennd6b
chr7	126795260	126795405	59.3718	-	ENSMUSG00000030695	Aldoa
chr11	115529397	115529597	58.4204	-	ENSMUSG00000020738	Sumo2
chr11	5119834	5119936	57.2393	-	ENSMUSG00000034164	Emid1
chr16	49912355	49912495	55.8719	+	ENSMUSG00000055447	Cd47
chr1	171028007	171028116	55.3114	+	ENSMUSG00000059089	Fcgr4
chr15	80257415	80257582	55.2044	+	ENSMUSG00000042406	Atf4
chr18	34608657	34608773	54.783	-	ENSMUSG00000003778	Brd8
chr5	117113102	117113298	54.6192	-	ENSMUSG00000066900	Suds3
chr8	86671322	86671427	53.5587	+	ENSMUSG00000047866	Lonp2
chr7	19590598	19590711	51.5063	-	ENSMUSG00000061028	Clasrp
chr8	11623857	11624107	50.807	-	ENSMUSG00000031508	Ankrd10
chr10	86813197	86813336	50.7116	+	ENSMUSG00000054027	Nt5dc3
chr6	103649023	103649238	50.6062	+	ENSMUSG00000030077	Chl1
chr13	48833222	48833324	50.5782	-	ENSMUSG00000038025	Phf2
chr11	98204583	98204682	50.0077	+	ENSMUSG00000003119	Cdk12
chr12	59046465	59046570	49.6277	-	ENSMUSG00000020993	Trappc6b
chr10	75016223	75016324	49.5859	+	ENSMUSG00000040009	Gnaz
chr6	85454263	85454362	49.2176	+	ENSMUSG00000030007	Cct7
chr9	77792112	77792215	49.1644	+	ENSMUSG00000032350	Gclc
chr5	146760654	146760847	49.0375	-	ENSMUSG00000029640	Usp12
chr11	45932853	45932958	48.5209	-	ENSMUSG00000044847	Lsm11
chr3	105030663	105030767	48.4538	-	ENSMUSG00000062127	Cttnbp2nl
chr11	120141985	120142188	48.1376	-	ENSMUSG00000061306	Slc38a10
chr3	96044506	96044772	47.8743	-	ENSMUSG00000015747	Vps45
chr1	152753321	152753414	47.655	-	ENSMUSG00000026482	Rgl1
chr4	46158555	46158675	47.6197	+	ENSMUSG00000028330	Ncbp1
chr16	4516602	4516712	46.5301	-	ENSMUSG00000022519	Srl
chr15	9104891	9104991	46.4885	+	ENSMUSG00000022253	Nadk2
chr7	49816187	49816312	46.3322	+	ENSMUSG00000030505	Prmt3
chr4	16160312	16160413	46.263	-	ENSMUSG00000041135	Ripk2
chr7	141631324	141631460	46.1113	+	ENSMUSG00000002957	Ap2a2
chr6	128416126	128416244	45.1919	-	ENSMUSG00000001518	Itfg2
chr12	3755555	3755652	44.8228	+	ENSMUSG00000071454	Dtnb
chr4	84499973	84500082	44.7796	-	ENSMUSG00000028487	Bnc2
chr9	44510063	44510197	44.7713	+	ENSMUSG00000063382	Bcl9l
chr11	5204975	5205083	44.6862	-	ENSMUSG00000020393	Kremen1
chr9	123461908	123462185	44.6638	+	ENSMUSG00000035202	Lars2
chr12	67059192	67059960	44.5141	-	ENSMUSG00000034912	Mdga2
chr7	46790885	46790977	43.8935	-	ENSMUSG00000014418	Hps5
chr11	109485237	109485334	43.6639	+	ENSMUSG00000020604	Arsg
chr11	6329456	6329641	43.6081	+	ENSMUSG00000020456	Ogdh
chr11	74906088	74906197	43.1134	+	ENSMUSG00000038335	Tsr1
chr2	59672014	59672123	42.9428	+	ENSMUSG00000035168	Tanc1
chr2	98666551	98667326	42.9423	-	ENSMUSG00000075014	Gm10800
chr13	70615725	70615889	42.6886	-	ENSMUSG00000034525	Ice1
chr12	17735136	17735235	42.5538	+	ENSMUSG00000071379	Hpcal1
chr4	48215972	48216068	42.3906	-	ENSMUSG00000028343	Erp44
chr3	99981104	99981393	41.9436	+	ENSMUSG00000027867	Spag17
chr15	80081222	80081340	41.451	-	ENSMUSG00000060036	Rpl3
chr11	120578689	120578818	41.3931	-	ENSMUSG00000025132	Arhgdia
chr11	93890539	93890636	41.0301	+	ENSMUSG00000059474	Mbtd1
chr15	5118375	5118488	40.965	+	ENSMUSG00000041841	Rpl37
chr12	56340665	56340821	40.8388	-	ENSMUSG00000021028	Mbip
chr2	30350829	30350942	40.5557	-	ENSMUSG00000026860	Sh3glb2
chr2	144397503	144397605	40.2021	+	ENSMUSG00000027425	Csrp2bp
chr7	142366178	142366354	39.781	-	ENSMUSG00000045777	Ifitm10
chr17	87008547	87008642	39.723	-	ENSMUSG00000024145	Pigf
chr2	168219954	168220078	39.723	-	ENSMUSG00000093752	Gm20716
chr2	168219954	168220078	39.723	-	ENSMUSG00000078919	Dpm1
chr9	99519019	99519119	39.7183	-	ENSMUSG00000032468	Armc8
chr6	125002222	125002375	39.4691	+	ENSMUSG00000030329	Pianp
chr13	36098718	36098802	39.3318	-	ENSMUSG00000046573	Lyrm4
chr15	98951047	98951190	39.2936	-	ENSMUSG00000072235	Tuba1a
chr4	84966165	84966257	39.2936	+	ENSMUSG00000038070	Cntln
chr7	45064233	45064339	39.1864	+	ENSMUSG00000003421	Nosip
chr10	126898692	126898812	39.0581	-	ENSMUSG00000025436	Xrcc6bp1
chr2	151601655	151601749	39.0565	-	ENSMUSG00000027457	Snph
chr3	121444240	121444339	39.0196	+	ENSMUSG00000053931	Cnn3
chr11	115425844	115425999	38.7896	+	ENSMUSG00000016940	Kctd2
chr2	39016828	39016919	38.6864	-	ENSMUSG00000026754	Golga1
chr5	31273191	31273297	38.5563	-	ENSMUSG00000038564	Ift172
chr10	128440382	128440481	38.5453	+	ENSMUSG00000025373	Rnf41
chr3	97601653	97601761	38.4132	-	ENSMUSG00000028089	Chd1l
chr16	57178451	57178561	38.3403	-	ENSMUSG00000022749	Tbc1d23
chr15	102281057	102281191	38.3352	+	ENSMUSG00000045665	Mfsd5
chr9	121946333	121946536	38.2978	+	ENSMUSG00000043773	1700048O20Rik
chr5	118008342	118008439	38.1567	+	ENSMUSG00000032898	Fbxo21
chr11	72308892	72309055	38.0384	+	ENSMUSG00000040483	Xaf1
chr17	24685242	24685413	37.4687	-	ENSMUSG00000007021	Syngr3
chr2	32326766	32326866	37.172	-	ENSMUSG00000026825	Dnm1
chr5	139766162	139766266	37.1702	-	ENSMUSG00000029547	Ints1
chr5	117377987	117378276	37.0311	+	ENSMUSG00000029364	Wsb2
chr5	138169159	138169265	36.9384	-	ENSMUSG00000029730	Mcm7
chr8	111019633	111019726	36.924	-	ENSMUSG00000033658	Ddx19b
chr3	146435512	146435619	36.8849	+	ENSMUSG00000036825	Ssx2ip
chr10	79529753	79529893	36.866	-	ENSMUSG00000052151	Ppap2c
chr2	37662489	37662578	36.6853	-	ENSMUSG00000026915	Strbp
chr11	84486604	84486697	36.6542	-	ENSMUSG00000018697	Aatf
chr2	102829348	102829488	36.6466	-	ENSMUSG00000005087	Cd44
chr3	83068311	83068408	36.4981	+	ENSMUSG00000027998	Plrg1
chr9	21415152	21415265	36.2636	+	ENSMUSG00000002825	Qtrt1
chr6	115805495	115805617	36.2398	-	ENSMUSG00000057841	Rpl32
chr8	79394654	79394782	35.9463	-	ENSMUSG00000031681	Smad1
chr8	124795004	124795226	35.8882	+	ENSMUSG00000036913	Trim67
chr8	21999407	21999501	35.7362	-	ENSMUSG00000006567	Atp7b
chr8	124705832	124705945	35.6628	-	ENSMUSG00000037300	Ttc13
chr8	13340632	13340787	35.4971	+	ENSMUSG00000038482	Tfdp1
chr15	79247855	79248039	35.3083	+	ENSMUSG00000068206	Pick1
chr5	54076216	54076308	35.2618	+	ENSMUSG00000039156	Stim2
chr14	54648197	54648380	35.2527	-	ENSMUSG00000022185	Acin1
chr13	100071852	100071949	35.2088	-	ENSMUSG00000049658	Bdp1
chr13	69632202	69632334	35.1613	+	ENSMUSG00000021595	Nsun2
chr8	105619573	105619669	34.9816	+	ENSMUSG00000038604	Fam65a
chr5	92433384	92433526	34.967	-	ENSMUSG00000034826	Nup54
chr9	71916789	71916881	34.6817	-	ENSMUSG00000032228	Tcf12
chr4	40977954	40978080	34.6233	+	ENSMUSG00000028423	Nfx1
chr2	178290397	178290491	34.6043	+	ENSMUSG00000027525	Phactr3
chr11	116060035	116060161	34.5046	+	ENSMUSG00000020770	Unk
chr8	57633345	57633434	34.4991	-	ENSMUSG00000031608	Galnt7
chr1	39370999	39371143	34.4642	+	ENSMUSG00000073702	Rpl31
chr4	47469852	47470162	34.2936	-	ENSMUSG00000039740	Alg2
chr8	122630406	122630506	34.0735	-	ENSMUSG00000006362	Cbfa2t3
chr5	129730431	129730545	34.0551	+	ENSMUSG00000029432	Gbas
chr2	153826788	153827061	33.9788	+	ENSMUSG00000044083	Efcab8
chr1	36346985	36347113	33.7371	-	ENSMUSG00000010453	Kansl3
chr2	91947214	91947604	33.7042	-	ENSMUSG00000040479	Dgkz
chr10	77380477	77380578	33.6609	-	ENSMUSG00000020262	Adarb1
chr8	23246919	23247103	33.6322	-	ENSMUSG00000015341	Golga7
chr14	8098902	8099008	33.4982	+	ENSMUSG00000033885	Pxk
chr9	95867107	95867214	33.4982	+	ENSMUSG00000032409	Atr
chr3	105964120	105964223	33.3939	+	ENSMUSG00000000561	Wdr77
chr11	59703982	59704085	33.2766	+	ENSMUSG00000005417	Mprip
chr15	101287741	101287845	33.2376	+	ENSMUSG00000037204	Atg101
chr7	28181284	28181435	33.2376	+	ENSMUSG00000002409	Dyrk1b
chr5	135646059	135646164	33.1975	+	ENSMUSG00000039917	Rhbdd2
chr13	55703299	55703421	33.053	+	ENSMUSG00000045767	B230219D22Rik
chr4	32516393	32516488	32.722	+	ENSMUSG00000040270	Bach2
chr11	51620860	51620959	32.7147	+	ENSMUSG00000001056	Nhp2
chr2	11774874	11774962	32.6874	-	ENSMUSG00000058594	Fbxo18
chr5	32790994	32791085	32.5852	-	ENSMUSG00000093574	Gm20671
chr2	14051515	14051606	32.5739	-	ENSMUSG00000063275	Hacd1
chr1	171064156	171064259	32.4714	-	ENSMUSG00000059498	Fcgr3
chr10	29198886	29199170	32.332	+	ENSMUSG00000038916	Soga3
chr18	49852403	49852608	32.2358	+	ENSMUSG00000037416	Dmxl1
chr4	45004480	45004575	32.1615	-	ENSMUSG00000049657	Zbtb5
chr4	143175426	143175535	31.8178	-	ENSMUSG00000057637	Prdm2
chr8	79674436	79674536	31.7726	+	ENSMUSG00000036990	Otud4
chr7	100400247	100400344	31.6685	+	ENSMUSG00000047248	C2cd3
chr1	155967421	155967503	31.5667	-	ENSMUSG00000033671	Cep350
chr7	128439873	128439973	31.5443	-	ENSMUSG00000030846	Tial1
chr7	97724310	97724408	31.5064	-	ENSMUSG00000042797	Aqp11
chr3	27204641	27204726	31.4226	+	ENSMUSG00000027698	Nceh1
chr6	34358187	34358273	31.4226	+	ENSMUSG00000029762	Akr1b8
chr15	82006210	82006506	31.4175	-	ENSMUSG00000022472	Desi1
chr8	3640726	3640909	31.4051	+	ENSMUSG00000004626	Stxbp2
chr6	30747119	30747240	31.3759	+	ENSMUSG00000051855	Mest
chr11	119080266	119080353	31.3404	-	ENSMUSG00000039989	Cbx4
chr8	33815614	33815710	31.286	-	ENSMUSG00000031586	Rbpms
chr15	31595150	31595249	31.24	-	ENSMUSG00000022234	Cct5
chr4	91325926	91326088	31.1339	-	ENSMUSG00000008489	Elavl2
chr12	81866718	81866808	31.1238	+	ENSMUSG00000021140	Pcnx
chr2	138263020	138263119	31.117	+	ENSMUSG00000062098	Btbd3
chr7	27970031	27970114	31.0596	-	ENSMUSG00000063047	Zfp780b
chr3	96435570	96435724	30.9828	-	ENSMUSG00000046317	BC107364
chr9	70728106	70728197	30.8622	+	ENSMUSG00000054693	Adam10
chr10	127190485	127190644	30.8526	-	ENSMUSG00000040415	Dtx3
chr2	130172907	130173000	30.8157	-	ENSMUSG00000027404	Snrpb
chr6	124860709	124860806	30.7945	-	ENSMUSG00000038390	Gpr162
chr9	20877651	20877760	30.7945	-	ENSMUSG00000038742	Angptl6
chr8	123948856	123948942	30.7593	-	ENSMUSG00000039509	Nup133
chr3	87992929	87993016	30.5642	-	ENSMUSG00000004892	Bcan
chr19	4920821	4920941	30.547	-	ENSMUSG00000063904	4930533O14Rik
chr9	86625260	86625355	30.547	-	ENSMUSG00000032418	Me1
chr11	70652710	70652812	30.5355	-	ENSMUSG00000018293	Pfn1
chr15	100407073	100407161	30.3752	-	ENSMUSG00000023030	Slc11a2
chr10	78211649	78211828	30.3275	-	ENSMUSG00000000374	Trappc10
chr14	55069656	55069761	30.0751	+	ENSMUSG00000045691	Thtpa
chr3	144467618	144467719	29.999	-	ENSMUSG00000040151	Hs2st1
chr10	30839378	30839477	29.7982	-	ENSMUSG00000019789	Hey2
chr2	120035806	120035893	29.7643	+	ENSMUSG00000033852	Gm28042
chr2	120035806	120035893	29.7643	+	ENSMUSG00000098488	Pla2g4b
chr7	28396324	28396415	29.7643	+	ENSMUSG00000003437	Paf1
chr12	87432271	87432378	29.7636	-	ENSMUSG00000079036	Alkbh1
chr3	88356208	88356300	29.6987	+	ENSMUSG00000001415	Smg5
chr13	102850926	102851011	29.6542	-	ENSMUSG00000034751	Mast4
chr11	84089337	84089475	29.6262	-	ENSMUSG00000018651	Tada2a
chr8	33619164	33619356	29.614	+	ENSMUSG00000009630	Ppp2cb
chr1	59225067	59225234	29.4791	-	ENSMUSG00000026024	Als2
chr9	64181095	64181251	29.4718	+	ENSMUSG00000032398	Snapc5
chr8	11765973	11766064	29.4709	+	ENSMUSG00000031511	Arhgef7
chr11	103013690	103013823	29.4654	-	ENSMUSG00000020935	Dcakd
chr16	18285939	18286108	29.4126	-	ENSMUSG00000022718	Dgcr8
chr3	81939609	81939697	29.3446	+	ENSMUSG00000028015	Ctso
chr8	18735975	18736071	29.3446	+	ENSMUSG00000039842	Mcph1
chr7	110059699	110059896	29.3123	-	ENSMUSG00000073867	AA474408
chr6	72843347	72843435	29.2811	-	ENSMUSG00000055239	Kcmf1
chr16	20112350	20112445	29.1898	+	ENSMUSG00000062901	Klhl24
chr14	27429787	27429900	29.1636	+	ENSMUSG00000040651	Fam208a
chr14	31617984	31618091	29.146	-	ENSMUSG00000021884	Hacl1
chr16	32900981	32901084	29.1415	+	ENSMUSG00000022800	Fyttd1
chr9	108844861	108844998	29.1378	+	ENSMUSG00000023473	Celsr3
chr16	56135172	56135260	29.1329	+	ENSMUSG00000052917	Senp7
chr9	118059712	118059792	29.1045	+	ENSMUSG00000039285	Azi2
chr12	21245145	21245246	29.1022	+	ENSMUSG00000052632	Asap2
chr5	142871908	142872018	28.9835	-	ENSMUSG00000066640	Fbxl18
chr5	3626305	3626459	28.9678	+	ENSMUSG00000005907	Pex1
chr11	69102914	69103052	28.8096	+	ENSMUSG00000020893	Per1
chr1	190893438	190893531	28.8061	-	ENSMUSG00000089872	Rps6kc1
chr11	60785199	60785286	28.7479	+	ENSMUSG00000049323	Smcr8
chr17	25140209	25140289	28.7337	+	ENSMUSG00000036636	Clcn7
chr1	151353537	151353643	28.7308	+	ENSMUSG00000023150	Ivns1abp
chr3	103955544	103955648	28.6713	+	ENSMUSG00000044098	Rsbn1
chr4	8603202	8603288	28.6501	+	ENSMUSG00000047187	Rab2a
chr8	57324067	57324471	28.624	+	ENSMUSG00000038193	Hand2
chr10	79708267	79708699	28.5749	+	ENSMUSG00000023175	Bsg
chr19	36455765	36455884	28.555	+	ENSMUSG00000024805	Pcgf5
chr1	121483371	121483599	28.5079	+	ENSMUSG00000026339	Ccdc93
chr8	77550478	77550617	28.5068	+	ENSMUSG00000037134	Prmt10
chr2	73908475	73908706	28.502	-	ENSMUSG00000018770	Atp5g3
chr11	58932471	58932569	28.4247	-	ENSMUSG00000020496	Rnf187
chr4	101195084	101195173	28.4023	-	ENSMUSG00000028530	Jak1
chr11	62282908	62282999	28.3783	+	ENSMUSG00000042298	Ttc19
chr11	115787019	115787120	28.3783	+	ENSMUSG00000020747	2310067B10Rik
chr4	109727951	109728035	28.3783	+	ENSMUSG00000010517	Faf1
chr8	106975609	106975695	28.3783	+	ENSMUSG00000041308	Sntb2
chr7	46493275	46493395	28.3738	-	ENSMUSG00000030839	Sergef
chr7	4995018	4995292	28.37	-	ENSMUSG00000051550	Zfp579
chr2	113776685	113776828	28.3215	-	ENSMUSG00000023236	Scg5
chr16	8837904	8838012	28.2499	+	ENSMUSG00000022507	1810013L24Rik
chr2	16410602	16410882	28.2084	+	ENSMUSG00000026748	Plxdc2
chr5	4067565	4067675	28.1834	+	ENSMUSG00000040407	Akap9
chr5	137521535	137521646	28.1324	+	ENSMUSG00000029714	Gigyf1
chrX	113089787	113089972	28.073	-	ENSMUSG00000025531	Chm
chr11	88049519	88049966	28.0647	+	ENSMUSG00000018379	Srsf1
chr8	119348045	119348137	28.0574	+	ENSMUSG00000031839	Hsbp1
chrX	47838976	47839051	27.8761	-	ENSMUSG00000031099	Smarca1
chr5	103889911	103890003	27.7878	-	ENSMUSG00000029312	Klhl8
chr1	4890760	4890852	27.731	+	ENSMUSG00000033813	Tcea1
chr9	53649525	53649743	27.7013	-	ENSMUSG00000032030	Cul5
chr17	15433153	15433257	27.6895	+	ENSMUSG00000014763	Fam120b
chr11	4815841	4815983	27.6853	-	ENSMUSG00000009073	Nf2
chr7	99838975	99839061	27.6543	-	ENSMUSG00000035227	Spcs2
chr15	81475055	81475261	27.6023	+	ENSMUSG00000022400	Rbx1
chr9	121381187	121381429	27.6023	+	ENSMUSG00000032536	Trak1
chr4	148624320	148624510	27.5413	-	ENSMUSG00000041459	Tardbp
chr17	47499248	47499350	27.5134	-	ENSMUSG00000023980	Taf8
chr3	53451369	53451467	27.5134	-	ENSMUSG00000042997	Nhlrc3
chr6	95681399	95681498	27.5134	-	ENSMUSG00000061838	Suclg2
chr6	120907090	120907212	27.4781	-	ENSMUSG00000004446	Bid
chr7	100328904	100328999	27.3741	-	ENSMUSG00000030718	Ppme1
chr1	133004245	133004463	27.3621	-	ENSMUSG00000054387	Mdm4
chr5	30718384	30718470	27.3516	+	ENSMUSG00000029168	Dpysl5
chr8	83587644	83587748	27.2696	-	ENSMUSG00000031708	Tecr
chr18	36413643	36413731	27.239	-	ENSMUSG00000024346	Pfdn1
chr8	121597813	121597920	27.2235	+	ENSMUSG00000031812	Map1lc3b
chr4	117884889	117885067	27.1818	-	ENSMUSG00000033379	Atp6v0b
chr1	13367119	13367215	27.1442	-	ENSMUSG00000005886	Ncoa2
chr18	9429428	9429514	27.1319	-	ENSMUSG00000024286	Ccny
chr10	115388263	115388389	27.0787	+	ENSMUSG00000034163	Zfc3h1
chr4	99958685	99958791	26.959	+	ENSMUSG00000025791	Pgm2
chr14	45466345	45466426	26.9055	-	ENSMUSG00000037712	Fermt2
chr15	98599519	98599631	26.8742	-	ENSMUSG00000022994	Adcy6
chr16	20633280	20633408	26.8332	+	ENSMUSG00000022842	Ece2
chr10	60777775	60777865	26.8147	-	ENSMUSG00000020099	Unc5b
chr3	87920205	87920303	26.7954	+	ENSMUSG00000019710	Mrpl24
chr4	15286636	15286720	26.7703	+	ENSMUSG00000043252	Tmem64
chrX	37082581	37082665	26.7197	-	ENSMUSG00000079641	Rpl39
chr9	120495196	120495343	26.634	+	ENSMUSG00000006941	Eif1b
chr5	7300439	7300529	26.5999	-	ENSMUSG00000092094	Zfp804b
chr3	94443792	94443958	26.5747	+	ENSMUSG00000028140	Mrpl9
chr12	111539093	111539266	26.5488	+	ENSMUSG00000021282	Eif5
chr8	13268559	13268682	26.5175	-	ENSMUSG00000038506	Dcun1d2
chrX	17559870	17559961	26.5175	-	ENSMUSG00000025040	Fundc1
chr16	76403195	76403351	26.4889	-	ENSMUSG00000050299	Gm9843
chr10	80091426	80091519	26.4837	-	ENSMUSG00000035673	Sbno2
chr1	160248612	160248701	26.4763	-	ENSMUSG00000026721	Rabgap1l
chr5	52791931	52792025	26.4679	+	ENSMUSG00000029179	Zcchc4
chr8	111977222	111977337	26.4299	-	ENSMUSG00000031949	Adat1
chr4	156250913	156251071	26.3891	-	ENSMUSG00000096351	Samd11
chr1	134419959	134420051	26.3313	+	ENSMUSG00000026457	Adipor1
chr8	70347534	70347638	26.3207	-	ENSMUSG00000058301	Upf1
chr16	16341559	16341678	26.2845	-	ENSMUSG00000022789	Dnm1l
chr6	86465675	86465756	26.2563	+	ENSMUSG00000046679	C87436
chr2	25603123	25603279	26.255	-	ENSMUSG00000015087	Rabl6
chr17	14986590	14986694	26.2034	+	ENSMUSG00000036552	Ermard
chr16	17249368	17249470	26.1452	+	ENSMUSG00000050240	Hic2
chr8	31167634	31167718	26.1428	-	ENSMUSG00000031578	Mak16
chr10	85955855	85955965	26.1171	-	ENSMUSG00000001783	Rtcb
chr6	25763955	25764110	26.1147	-	ENSMUSG00000029676	Pot1a
chr3	129829461	129829601	26.0123	-	ENSMUSG00000028010	Gar1
chr12	86140448	86140568	25.992	+	ENSMUSG00000007867	Ift43
chr18	34762734	34762881	25.9892	+	ENSMUSG00000034300	Fam53c
chr4	33945890	33946185	25.9324	+	ENSMUSG00000044288	Cnr1
chr17	23765941	23766047	25.8593	-	ENSMUSG00000040097	Flywch1
chr11	75736734	75736827	25.8439	+	ENSMUSG00000020849	Ywhae
chr1	162692967	162693154	25.8081	-	ENSMUSG00000040225	Prrc2c
chr10	53604731	53604829	25.7122	-	ENSMUSG00000058298	Mcm9
chr9	123698237	123698336	25.6341	-	ENSMUSG00000025245	Lztfl1
chr9	57437758	57437848	25.6011	-	ENSMUSG00000063849	Ppcdc
chr14	34279904	34279994	25.5684	-	ENSMUSG00000041471	Fam35a
chr2	155403571	155403714	25.5565	-	ENSMUSG00000038369	Ncoa6
chr15	81455322	81455418	25.5413	+	ENSMUSG00000022401	Xpnpep3
chrX	101559557	101559669	25.5228	+	ENSMUSG00000031314	Taf1
chr1	20986456	20986534	25.5186	+	ENSMUSG00000041809	Efhc1
chr7	142040370	142040457	25.4657	-	ENSMUSG00000025147	Mob2
chr2	156081973	156082062	25.4656	-	ENSMUSG00000074643	Cpne1
chr2	156081973	156082062	25.4656	-	ENSMUSG00000098950	Gm28036
chr8	111716040	111716142	25.4352	-	ENSMUSG00000031955	Bcar1
chr13	104061618	104061727	25.432	-	ENSMUSG00000021710	Nln
chr11	20631419	20631512	25.3979	+	ENSMUSG00000049800	Sertad2
chr9	88458304	88458405	25.3393	-	ENSMUSG00000032423	Syncrip
chr9	45484048	45484157	25.3232	+	ENSMUSG00000032087	Dscaml1
chr5	125385802	125386005	25.3196	-	ENSMUSG00000008348	Ubc
chr7	75655307	75655392	25.3027	+	ENSMUSG00000066406	Akap13
chr5	25256520	25256610	25.275	+	ENSMUSG00000038072	Galnt11
chr1	9729953	9730032	25.2418	-	ENSMUSG00000045210	Vcpip1
chr8	40604048	40604151	25.22	-	ENSMUSG00000039431	Mtmr7
chr11	77296020	77296113	25.214	+	ENSMUSG00000037926	Ssh2
chr19	7425338	7425471	25.214	+	ENSMUSG00000053080	2700081O15Rik
chr18	46970971	46971066	25.1998	+	ENSMUSG00000042705	Commd10
chr10	80301495	80301678	25.1943	+	ENSMUSG00000020135	Apc2
chr6	116114391	116114486	25.1596	-	ENSMUSG00000030126	Tmcc1
chr6	7854900	7854990	25.1393	+	ENSMUSG00000042460	C1galt1
chr13	55117856	55118015	25.1264	+	ENSMUSG00000021481	Zfp346
chr15	103243998	103244161	25.1202	+	ENSMUSG00000046434	Hnrnpa1
chr5	30956321	30956497	25.1072	-	ENSMUSG00000045302	Preb
chr7	112905283	112905362	25.1038	+	ENSMUSG00000055320	Tead1
chr11	97509893	97510013	25.0976	-	ENSMUSG00000038453	Srcin1
chr7	115696070	115696157	25.0699	-	ENSMUSG00000051910	Sox6
chr11	32232086	32232186	25.0532	-	ENSMUSG00000020289	Nprl3
chr2	58574751	58574838	25.0517	+	ENSMUSG00000026839	Upp2
chr7	19633446	19633558	25.0441	-	ENSMUSG00000002981	Clptm1
chr3	108392697	108392789	24.8942	-	ENSMUSG00000068740	Celsr2
chr4	104721793	104721867	24.863	+	ENSMUSG00000028519	Dab1
chr5	67094445	67094857	24.8014	-	ENSMUSG00000012520	Phox2b
chr14	121999269	121999350	24.7775	+	ENSMUSG00000041765	Ubac2
chr3	103046760	103046847	24.7596	+	ENSMUSG00000068823	Csde1
chr11	33353184	33353265	24.7581	-	ENSMUSG00000040594	Ranbp17
chr7	34223228	34223409	24.7404	-	ENSMUSG00000036427	Gpi1
chr1	64536332	64536563	24.7395	+	ENSMUSG00000025958	Creb1
chr4	117048513	117048614	24.7395	+	ENSMUSG00000028683	Eif2b3
chr14	33360317	33360410	24.729	+	ENSMUSG00000063506	Arhgap22
chr4	155965863	155965961	24.729	+	ENSMUSG00000023571	Fam132a
chr2	151495679	151495917	24.6689	+	ENSMUSG00000027455	Nsfl1c
chr7	25044156	25044241	24.6298	-	ENSMUSG00000003378	Grik5
chr7	55937578	55937668	24.6298	-	ENSMUSG00000030452	Nipa2
chr1	175154215	175154306	24.6286	-	ENSMUSG00000026527	Rgs7
chr11	50200170	50200305	24.6191	-	ENSMUSG00000015837	Sqstm1
chr11	120347419	120347658	24.5988	-	ENSMUSG00000062825	Actg1
chr6	39612161	39612251	24.598	-	ENSMUSG00000002413	Braf
chr3	54715722	54715901	24.5946	+	ENSMUSG00000027751	Supt20
chr11	97041993	97042115	24.5805	+	ENSMUSG00000001445	Mrpl10
chr17	29623235	29623327	24.4998	+	ENSMUSG00000090083	Rnf8
chr17	29623235	29623327	24.4998	+	ENSMUSG00000098374	Gm28043
chr11	3260294	3260388	24.4876	-	ENSMUSG00000020457	Drg1
chr2	125120385	125120618	24.4822	-	ENSMUSG00000027201	Myef2
chr17	34910053	34910218	24.4386	+	ENSMUSG00000013787	Ehmt2
chr8	75100309	75100400	24.4386	+	ENSMUSG00000005413	Hmox1
chr8	34170680	34170799	24.407	+	ENSMUSG00000031532	Saraf
chr17	24160475	24160590	24.3951	-	ENSMUSG00000036820	Amdhd2
chr6	86431196	86431323	24.3906	+	ENSMUSG00000107539	RP23-281H4.10
chr2	83648985	83649150	24.3767	+	ENSMUSG00000027091	Zc3h15
chr11	120560770	120560929	24.3329	-	ENSMUSG00000025130	P4hb
chr15	95632013	95632094	24.3239	-	ENSMUSG00000045608	Dbx2
chr16	78374289	78374404	24.3239	-	ENSMUSG00000022863	Btg3
chr4	86387004	86387198	24.2969	+	ENSMUSG00000066113	Adamtsl1
chr3	108077828	108078151	24.2352	-	ENSMUSG00000027889	Ampd2
chr5	144269270	144269352	24.1928	+	ENSMUSG00000047843	Bri3
chr8	106040581	106040676	24.1928	+	ENSMUSG00000031901	Dus2
chr13	12197014	12197103	24.1591	-	ENSMUSG00000021311	Mtr
chr4	156229792	156229996	24.1591	-	ENSMUSG00000078484	Klhl17
chr6	34875111	34875203	24.1518	-	ENSMUSG00000046806	3110062M04Rik
chr10	60302094	60302386	24.1492	+	ENSMUSG00000004207	Psap
chr2	69865257	69865344	24.1434	+	ENSMUSG00000068882	Ssb
chr18	30307040	30307136	24.1377	+	ENSMUSG00000033628	Pik3c3
chr9	99413852	99413952	24.1222	-	ENSMUSG00000032470	Mras
chr1	93799388	93799494	24.0762	-	ENSMUSG00000026281	Dtymk
chr9	21832671	21832767	24.0762	-	ENSMUSG00000032198	Dock6
chr5	25811710	25811796	24.0733	+	ENSMUSG00000056367	Actr3b
chr6	29126486	29126676	24.0082	-	ENSMUSG00000029701	Rbm28
chr10	78401658	78401742	23.9681	-	ENSMUSG00000061032	Rrp1
chr11	3146677	3146862	23.9319	-	ENSMUSG00000023764	Sfi1
chr5	33890236	33890333	23.9011	+	ENSMUSG00000057406	Whsc1
chr14	118951811	118951912	23.8676	+	ENSMUSG00000022136	Dnajc3
chr2	170512562	170512659	23.8634	+	ENSMUSG00000052033	Pfdn4
chr10	85879860	85879935	23.849	+	ENSMUSG00000001785	Pwp1
chr16	38505016	38505121	23.8227	-	ENSMUSG00000002846	Timmdc1
chr3	137924148	137924259	23.8044	+	ENSMUSG00000091512	Lamtor3
chr2	40960388	40960470	23.7747	-	ENSMUSG00000049252	Lrp1b
chr5	124406922	124407062	23.73	-	ENSMUSG00000038095	Sbno1
chr19	21836472	21836660	23.7147	+	ENSMUSG00000024754	Tmem2
chr10	71229925	71230012	23.6597	-	ENSMUSG00000003923	Tfam
chrX	13641084	13641167	23.6597	-	ENSMUSG00000031012	Cask
chr18	14636951	14637041	23.6557	-	ENSMUSG00000037013	Ss18
chr5	74009903	74009994	23.6042	-	ENSMUSG00000054814	Usp46
chr14	8172440	8172538	23.5488	-	ENSMUSG00000021748	Pdhb
chr13	67515565	67515643	23.5032	-	ENSMUSG00000097565	Gm26965
chr9	63693892	63693973	23.5032	-	ENSMUSG00000032402	Smad3
chr12	76943394	76943480	23.5	-	ENSMUSG00000059436	Max
chr3	7404628	7404721	23.4105	+	ENSMUSG00000027499	Pkia
chr4	24587961	24588055	23.4105	+	ENSMUSG00000045751	Mms22l
chr14	45339612	45339734	23.3649	+	ENSMUSG00000021832	Psmc6
chr3	95111348	95111592	23.357	+	ENSMUSG00000008958	Vps72
chr4	123593240	123593334	23.3507	-	ENSMUSG00000028649	Macf1
chr13	56733333	56733419	23.3499	+	ENSMUSG00000021540	Smad5
chr15	98831755	98831975	23.3488	-	ENSMUSG00000048154	Kmt2d
chr16	18223369	18223471	23.3401	-	ENSMUSG00000060166	Zdhhc8
chr7	97319121	97319278	23.3401	-	ENSMUSG00000035713	Usp35
chr17	46017449	46017619	23.2939	-	ENSMUSG00000023951	Vegfa
chr7	4490504	4490590	23.2634	-	ENSMUSG00000019254	Ppp1r12c
chr14	52263016	52263164	23.2579	-	ENSMUSG00000022159	Rab2b
chr6	124430840	124430944	23.2579	-	ENSMUSG00000008153	Clstn3
chr4	121146154	121146287	23.2554	-	ENSMUSG00000049878	Rlf
chr5	124090827	124091032	23.2554	-	ENSMUSG00000029408	Abcb9
chr14	122703452	122703540	23.2444	+	ENSMUSG00000041650	Pcca
chr9	105419741	105419847	23.2107	-	ENSMUSG00000032570	Atp2c1
chr3	133341740	133341828	23.197	+	ENSMUSG00000028013	Ppa2
chr17	25660170	25660273	23.1947	+	ENSMUSG00000002279	Lmf1
chr12	100653126	100653208	23.1578	-	ENSMUSG00000021180	Rps6ka5
chr17	22862842	22862928	23.1578	-	ENSMUSG00000059142	Zfp945
chr10	127113330	127113412	23.1569	-	ENSMUSG00000040462	Os9
chr1	72360445	72360538	23.1429	+	ENSMUSG00000026187	Xrcc5
chr11	32497545	32497631	23.1429	+	ENSMUSG00000044949	Ubtd2
chr13	43299335	43299421	23.0808	-	ENSMUSG00000051335	Gfod1
chr5	137291326	137291434	23.0709	+	ENSMUSG00000023328	Ache
chr16	37814702	37814794	23.0692	+	ENSMUSG00000022816	Fstl1
chr5	44074855	44074963	23.0464	-	ENSMUSG00000029086	Prom1
chr2	165385240	165385326	22.9659	-	ENSMUSG00000017667	Zfp334
chr10	68177919	68177998	22.9609	-	ENSMUSG00000019947	Arid5b
chr12	91762446	91762530	22.9609	-	ENSMUSG00000020961	Ston2
chr15	9147355	9147432	22.9538	+	ENSMUSG00000039704	Lmbrd2
chr1	43061861	43062032	22.9434	-	ENSMUSG00000070939	Tgfbrap1
chr5	107904468	107904654	22.9322	+	ENSMUSG00000058558	Rpl5
chr7	98157676	98157767	22.9089	-	ENSMUSG00000035547	Capn5
chr19	60970931	60971106	22.896	+	ENSMUSG00000003228	Grk5
chr6	108375161	108375259	22.8188	+	ENSMUSG00000030102	Itpr1
chr8	26006213	26006303	22.777	-	ENSMUSG00000015994	Fnta
chr19	32809984	32810073	22.7727	+	ENSMUSG00000013663	Pten
chr11	18974473	18974558	22.7387	-	ENSMUSG00000020160	Meis1
chr10	67547043	67547205	22.7249	-	ENSMUSG00000057134	Ado
chr16	55882133	55882216	22.7249	-	ENSMUSG00000075033	Nxpe3
chr6	35204841	35205097	22.7205	+	ENSMUSG00000038759	Nup205
chrX	135803176	135803463	22.7012	+	ENSMUSG00000043384	Gprasp1
chr19	60789563	60789651	22.6867	-	ENSMUSG00000024991	Eif3a
chr19	8915865	8915979	22.6067	+	ENSMUSG00000071650	Ganab
chr5	136021439	136021526	22.6067	+	ENSMUSG00000004947	Dtx2
chr15	3991035	3991134	22.5989	-	ENSMUSG00000041935	AW549877
chr1	187323922	187324006	22.5875	+	ENSMUSG00000039210	Gpatch2
chr19	10897976	10898077	22.5817	+	ENSMUSG00000024735	Prpf19
chr8	70650125	70650241	22.5734	-	ENSMUSG00000056204	Pgpep1
chr10	91158057	91158202	22.5506	-	ENSMUSG00000019961	Tmpo
chr13	49724188	49724371	22.5394	+	ENSMUSG00000037851	Iars
chr18	6025046	6025144	22.5293	-	ENSMUSG00000041225	Arhgap12
chr17	32937876	32937972	22.501	-	ENSMUSG00000024055	Cyp4f13
chr11	74502527	74502625	22.4645	-	ENSMUSG00000038807	Rap1gap2
chr12	30911348	30911423	22.3927	-	ENSMUSG00000044573	Acp1
chr2	150120175	150120281	22.3927	-	ENSMUSG00000068134	Zfp120
chr7	141474540	141474625	22.3822	-	ENSMUSG00000038489	Polr2l
chr1	87775764	87775855	22.3392	+	ENSMUSG00000026289	Atg16l1
chr2	116002133	116002214	22.3127	-	ENSMUSG00000027210	Meis2
chr8	47523646	47523753	22.3127	-	ENSMUSG00000038102	Trappc11
chr10	61098802	61098908	22.2919	-	ENSMUSG00000020097	Sgpl1
chr8	40493309	40493433	22.2919	-	ENSMUSG00000031601	Cnot7
chr5	135457872	135458014	22.2513	-	ENSMUSG00000039959	Hip1
chr15	27532093	27532187	22.2419	+	ENSMUSG00000022265	Ank
chr1	152866502	152866597	22.2415	-	ENSMUSG00000042772	Smg7
chr5	115268881	115268962	22.2415	-	ENSMUSG00000041740	Rnf10
chr11	5426937	5427031	22.214	-	ENSMUSG00000041961	Znrf3
chr9	22025967	22026050	22.2134	-	ENSMUSG00000003410	Elavl3
chr9	96717612	96717700	22.2134	-	ENSMUSG00000040433	Zbtb38
chr9	73012508	73012600	22.2059	-	ENSMUSG00000079469	Pigb
chr17	24503477	24503603	22.2049	+	ENSMUSG00000033597	Caskin1
chr2	32008020	32008207	22.2049	+	ENSMUSG00000001855	Nup214
chr4	66881971	66882067	22.1965	+	ENSMUSG00000039005	Tlr4
chr5	86835036	86835117	22.1582	+	ENSMUSG00000035851	Ythdc1
chr15	98746335	98746480	22.1492	-	ENSMUSG00000051853	Arf3
chr15	96698015	96698112	22.1405	-	ENSMUSG00000022462	Slc38a2
chr4	155428724	155428831	22.1394	+	ENSMUSG00000078490	Cfap74
chr17	29288400	29288485	22.1202	+	ENSMUSG00000052712	BC004004
chr13	100482657	100482753	22.0919	-	ENSMUSG00000021639	Gtf2h2
chr2	22589661	22589762	22.0752	+	ENSMUSG00000025716	Myo3a
chr14	13956209	13956366	22.06	-	ENSMUSG00000053453	Thoc7
chr2	120375565	120375648	22.06	-	ENSMUSG00000033808	Tmem87a
chr5	146455890	146455985	22.0516	+	ENSMUSG00000029636	Wasf3
chr15	99038047	99038123	22.0106	+	ENSMUSG00000043091	Tuba1c
chr10	77634174	77634283	22.0087	+	ENSMUSG00000009293	Ube2g2
chr11	4884114	4884202	22.0087	+	ENSMUSG00000034285	Nipsnap1
chr6	50174783	50174863	22.0087	+	ENSMUSG00000038388	Mpp6
chr11	46675906	46675975	21.9906	-	ENSMUSG00000040413	Timd2
chr9	50344226	50344327	21.9906	-	ENSMUSG00000058443	Rpl10-ps3
chr5	137036915	137037079	21.9578	-	ENSMUSG00000004849	Ap1s1
chr17	65924364	65924445	21.9486	-	ENSMUSG00000024098	Twsg1
chr3	95330080	95330168	21.9486	-	ENSMUSG00000015697	Setdb1
chr12	73255442	73255636	21.9474	+	ENSMUSG00000021103	Mnat1
chr8	78521173	78521293	21.9468	+	ENSMUSG00000031684	Slc10a7
chr19	10696656	10696784	21.9326	+	ENSMUSG00000048832	Vps37c
chr18	37790317	37790402	21.8995	+	ENSMUSG00000102428	Pcdhga12
chr9	31071893	31071984	21.817	+	ENSMUSG00000047412	Zbtb44
chr16	62772575	62772659	21.8008	-	ENSMUSG00000050312	Nsun3
chr11	72203583	72203675	21.7913	-	ENSMUSG00000020807	4933427D14Rik
chr10	80828969	80829149	21.7882	+	ENSMUSG00000035242	Oaz1
chr8	11520000	11520259	21.7862	-	ENSMUSG00000056228	Cars2
chr16	91424509	91424615	21.7779	+	ENSMUSG00000022969	Il10rb
chrX	7794288	7794519	21.7735	+	ENSMUSG00000031153	Gripap1
chr13	118385805	118385992	21.7637	-	ENSMUSG00000021731	Mrps30
chr8	23181059	23181169	21.7637	-	ENSMUSG00000031545	Gpat4
chr2	131275122	131275211	21.7516	+	ENSMUSG00000037514	Pank2
chr12	102812570	102812658	21.7364	-	ENSMUSG00000041702	Btbd7
chr10	13562454	13562540	21.6833	+	ENSMUSG00000019808	Adat2
chr4	129606267	129606352	21.6833	+	ENSMUSG00000028797	Tmem234
chr18	4385717	4385807	21.6823	+	ENSMUSG00000024234	Mtpap
chr9	113682691	113682789	21.6147	-	ENSMUSG00000032504	Pdcd6ip
chr9	111276280	111276373	21.6066	+	ENSMUSG00000046785	Epm2aip1
chr4	133965847	133965963	21.5884	-	ENSMUSG00000003038	Hmgn2
chr4	134898256	134898349	21.5838	-	ENSMUSG00000028822	Tmem50a
chr19	19049524	19049623	21.5781	-	ENSMUSG00000036192	Rorb
chr7	121075705	121075799	21.5751	+	ENSMUSG00000030876	Mettl9
chr2	147035669	147035775	21.5571	+	ENSMUSG00000027433	Xrn2
chr1	34446592	34446668	21.5433	+	ENSMUSG00000026127	Imp4
chr10	128107851	128107994	21.5433	+	ENSMUSG00000040054	Baz2a
chr1	52851975	52852184	21.5369	+	ENSMUSG00000041426	Hibch
chr8	106175778	106175864	21.5369	+	ENSMUSG00000031904	Slc7a6
chr2	34419138	34419225	21.5029	+	ENSMUSG00000038696	Mapkap1
chr3	54750663	54750746	21.5029	+	ENSMUSG00000036632	Alg5
chr11	100321201	100321294	21.4887	+	ENSMUSG00000035530	Eif1
chr8	20581666	20581738	21.4887	+	ENSMUSG00000095403	Gm21092
chr17	28465528	28465663	21.4839	-	ENSMUSG00000024222	Fkbp5
chr7	25723694	25723790	21.4632	-	ENSMUSG00000040725	Hnrnpul1
chr2	132121464	132121629	21.4605	-	ENSMUSG00000027340	Slc23a2
chr13	99351431	99351511	21.4557	+	ENSMUSG00000041632	Mrps27
chr6	49252759	49252840	21.432	-	ENSMUSG00000029817	Tra2a
chr12	69578366	69578518	21.4044	-	ENSMUSG00000049882	Vcpkmt
chr2	45108288	45108451	21.4009	-	ENSMUSG00000026872	Zeb2
chr9	104196010	104196097	21.3812	-	ENSMUSG00000032560	Dnajc13
chr16	55820406	55820608	21.3711	-	ENSMUSG00000035356	Nfkbiz
chr7	81900255	81900338	21.3711	-	ENSMUSG00000025104	Hdgfrp3
chr2	6197301	6197411	21.3709	-	ENSMUSG00000039063	Echdc3
chr3	89150583	89150842	21.3709	-	ENSMUSG00000028051	Hcn3
chr5	3570126	3570342	21.3633	+	ENSMUSG00000058503	Fam133b
chr17	15483217	15483388	21.3452	-	ENSMUSG00000014769	Psmb1
chr10	123028869	123028978	21.3308	-	ENSMUSG00000034602	Mon2
chr15	55042995	55043153	21.3308	-	ENSMUSG00000037343	Taf2
chr4	148262748	148262840	21.3308	-	ENSMUSG00000041544	Ptchd2
chr1	59692486	59692586	21.3256	+	ENSMUSG00000026020	Nop58
chr4	148594478	148594609	21.3256	+	ENSMUSG00000006442	Srm
chr5	138446516	138446618	21.3256	+	ENSMUSG00000036898	Zfp157
chr16	34482452	34482534	21.315	-	ENSMUSG00000061751	Kalrn
chr15	94546834	94546907	21.3106	+	ENSMUSG00000059883	Irak4
chr5	65457831	65457923	21.3055	-	ENSMUSG00000105835	Smim14
chr11	79144566	79144651	21.3009	-	ENSMUSG00000018334	Ksr1
chr9	53536232	53536318	21.3009	-	ENSMUSG00000034218	Atm
chr1	86577728	86577834	21.2808	-	ENSMUSG00000026239	Pde6d
chr5	23806915	23807008	21.277	+	ENSMUSG00000028999	Rint1
chr2	163995916	163996089	21.2764	+	ENSMUSG00000018326	Ywhab
chr3	88617388	88617485	21.2764	+	ENSMUSG00000028059	Arhgef2
chr2	180990051	180990130	21.2433	+	ENSMUSG00000016356	Col20a1
chr4	53535924	53536026	21.2377	+	ENSMUSG00000028412	Slc44a1
chr5	143909146	143909232	21.2334	-	ENSMUSG00000029610	Aimp2
chr13	48584795	48584892	21.2285	-	ENSMUSG00000038042	Ptpdc1
chr3	90506439	90506648	21.2	-	ENSMUSG00000001017	Chtop
chr5	65390529	65390649	21.1795	-	ENSMUSG00000047215	Rpl9
chr10	93861238	93861321	21.1712	-	ENSMUSG00000036112	Metap2
chr1	38074811	38074929	21.1446	-	ENSMUSG00000026082	Rev1
chr3	94432723	94432893	21.115	+	ENSMUSG00000041912	Tdrkh
chr5	104844032	104844129	21.1063	-	ENSMUSG00000072774	Zfp951
chr5	75194140	75194237	21.1058	+	ENSMUSG00000029231	Pdgfra
chr5	101926649	101926743	21.0934	-	ENSMUSG00000043940	Wdfy3
chr11	69026677	69026770	21.092	+	ENSMUSG00000020898	Ctc1
chr11	80266533	80266649	21.092	+	ENSMUSG00000017686	Rhot1
chr8	69809146	69809398	21.092	+	ENSMUSG00000036246	Gmip
chr14	122152681	122152773	21.0876	+	ENSMUSG00000025544	Tm9sf2
chr7	122682265	122682363	21.0876	+	ENSMUSG00000066189	Cacng3
chr3	90358302	90358408	21.0826	+	ENSMUSG00000042390	Gatad2b
chrX	73876261	73876451	21.0805	-	ENSMUSG00000031391	L1cam
chr15	84670906	84670987	21.0494	+	ENSMUSG00000036106	Prr5
chr11	80440525	80440655	21.0264	+	ENSMUSG00000017428	Psmd11
chr7	46051994	46052119	21.0025	+	ENSMUSG00000030835	Nomo1
chr9	46278095	46278177	21.0025	+	ENSMUSG00000032078	Zpr1
chr3	88168676	88168785	20.9908	+	ENSMUSG00000001419	Mef2d
chr1	183293825	183293934	20.9831	-	ENSMUSG00000046836	Brox
chr11	6218862	6218949	20.9813	-	ENSMUSG00000020447	Npc1l1
chr14	3335022	3335119	20.9789	+	ENSMUSG00000096574	Gm2956
chr16	32623124	32623294	20.9789	+	ENSMUSG00000022797	Tfrc
chr5	100052539	100052637	20.9767	+	ENSMUSG00000029326	Enoph1
chr9	43760657	43760771	20.9767	+	ENSMUSG00000032012	Pvrl1
chr11	51587515	51587636	20.9622	+	ENSMUSG00000020359	Phykpl
chr14	31171135	31171378	20.9348	-	ENSMUSG00000021910	Nisch
chr7	126470794	126470983	20.9348	-	ENSMUSG00000030733	Sh2b1
chr2	60783765	60783968	20.8654	-	ENSMUSG00000026970	Rbms1
chr9	15326275	15326481	20.8508	-	ENSMUSG00000046111	Cep295
chr6	71871050	71871153	20.8441	+	ENSMUSG00000052337	Immt
chr7	16406464	16406560	20.8441	+	ENSMUSG00000059273	Zc3h4
chr3	82388512	82388592	20.8144	+	ENSMUSG00000033900	Map9
chr6	83363188	83363285	20.813	-	ENSMUSG00000034832	Tet3
chr2	48815809	48815912	20.785	+	ENSMUSG00000052155	Acvr2a
chr3	121355311	121355387	20.785	+	ENSMUSG00000039887	Alg14
chr14	52212317	52212400	20.7667	-	ENSMUSG00000053754	Chd8
chr5	107814023	107814132	20.7667	-	ENSMUSG00000011831	Evi5
chr2	30811382	30811487	20.7602	+	ENSMUSG00000026857	Ntmt1
chr10	18100589	18100830	20.7069	+	ENSMUSG00000019854	Reps1
chr8	110818340	110818423	20.7045	-	ENSMUSG00000033732	Sf3b3
chr14	75284668	75284879	20.6993	+	ENSMUSG00000022000	Zc3h13
chr8	84947128	84947323	20.6993	+	ENSMUSG00000048617	Rtbdn
chr11	120952979	120953082	20.6613	+	ENSMUSG00000025161	Slc16a3
chr5	115563527	115563609	20.6613	+	ENSMUSG00000067274	Rplp0
chr8	13733606	13733703	20.63	+	ENSMUSG00000090336	4932443I19Rik
chr3	99162798	99162876	20.603	+	ENSMUSG00000004233	Wars2
chr19	11985232	11985321	20.5966	+	ENSMUSG00000024687	Osbp
chr7	44968262	44968362	20.5834	-	ENSMUSG00000007783	Cpt1c
chr10	39845988	39846115	20.5727	+	ENSMUSG00000019841	Rev3l
chr8	68825119	68825215	20.5691	+	ENSMUSG00000031864	Ints10
chr2	155210109	155210190	20.5567	+	ENSMUSG00000027598	Itch
chr2	71227821	71227935	20.5046	+	ENSMUSG00000027012	Dync1i2
chr5	100034694	100034934	20.4947	-	ENSMUSG00000029328	Hnrnpdl
chr15	35129163	35129247	20.4604	-	ENSMUSG00000022329	Stk3
chr7	143592751	143592923	20.4562	-	ENSMUSG00000010755	Cars
chr14	99055070	99055161	20.4512	+	ENSMUSG00000022070	Bora
chr16	24712830	24712918	20.4272	+	ENSMUSG00000033306	Lpp
chr2	91663573	91663658	20.4272	+	ENSMUSG00000027247	Arhgap1
chr5	137596729	137596815	20.425	-	ENSMUSG00000037221	Mospd3
chr11	97682256	97682356	20.4159	+	ENSMUSG00000038437	Mllt6
chr3	30803589	30803670	20.4006	+	ENSMUSG00000027706	Sec62
chr1	143622906	143622986	20.3513	-	ENSMUSG00000026361	Cdc73
chr5	122290202	122290295	20.3477	+	ENSMUSG00000038582	Pptc7
chr3	32716558	32716650	20.3334	+	ENSMUSG00000027671	Actl6a
chr6	128799439	128799510	20.2965	-	ENSMUSG00000107872	RP24-127M20.8
chr6	90518177	90518270	20.2938	+	ENSMUSG00000030088	Aldh1l1
chr13	57790861	57790935	20.2607	-	ENSMUSG00000056222	Spock1
chr4	136003657	136003748	20.2607	-	ENSMUSG00000028668	Tceb3
chr11	84234777	84234857	20.2581	+	ENSMUSG00000020532	Acaca
chr3	57819692	57819781	20.2553	+	ENSMUSG00000036503	Rnf13
chr8	123368214	123368287	20.2553	+	ENSMUSG00000010154	Spire2
chr4	152316513	152316693	20.2482	-	ENSMUSG00000058498	Rnf207
chr18	35233226	35233304	20.2458	+	ENSMUSG00000037815	Ctnna1
chr5	67279578	67279667	20.2371	+	ENSMUSG00000037720	Tmem33
chr5	100154993	100155090	20.2167	-	ENSMUSG00000050640	Tmem150c
chr10	81652960	81653048	20.2143	+	ENSMUSG00000096856	Gm10778
chr8	123414550	123414862	20.2066	+	ENSMUSG00000062380	Tubb3
chr4	102789695	102789776	20.1773	+	ENSMUSG00000028524	Sgip1
chr8	33736378	33736465	20.1471	+	ENSMUSG00000031585	Gtf2e2
chr9	18313635	18313760	20.1471	+	ENSMUSG00000001774	Chordc1
chr14	75995279	75995417	20.1453	-	ENSMUSG00000067995	Gtf2f2
chr11	102196787	102196866	20.1205	-	ENSMUSG00000008855	Hdac5
chr5	134592460	134592567	20.1187	+	ENSMUSG00000023104	Rfc2
chr1	106608552	106608625	20.0888	-	ENSMUSG00000057329	Bcl2
chr14	50811862	50811942	20.0869	+	ENSMUSG00000036023	Parp2
chr7	45390483	45390645	20.0628	-	ENSMUSG00000063511	Snrnp70
chr17	13824857	13824944	20.0603	+	ENSMUSG00000068036	Mllt4
chr2	175197361	175197444	20.0143	-	ENSMUSG00000078903	Gm14391
chr4	134927035	134927117	19.9964	+	ENSMUSG00000037266	Rsrp1
chr6	86418911	86419076	19.9922	+	ENSMUSG00000071337	Tia1
chr3	142792803	142792935	19.9817	-	ENSMUSG00000004591	Pkn2
chr2	180029426	180029534	19.9786	+	ENSMUSG00000039108	Lsm14b
chr9	45979417	45979546	19.9738	-	ENSMUSG00000003131	Pafah1b2
chr14	99196109	99196196	19.9736	+	ENSMUSG00000022064	Pibf1
chr2	153229126	153229219	19.9588	-	ENSMUSG00000051413	Plagl2
chr13	21832133	21832214	19.9551	-	ENSMUSG00000069305	Hist1h4n
chr11	97327073	97327175	19.9547	+	ENSMUSG00000018882	Mrpl45
chr12	71952736	71952817	19.9209	+	ENSMUSG00000034574	Daam1
chr2	119201621	119201713	19.8963	-	ENSMUSG00000034278	Dnajc17
chr13	55569540	55569650	19.8692	-	ENSMUSG00000021495	Fam193b
chr2	35715712	35715794	19.8641	+	ENSMUSG00000026883	Dab2ip
chr17	86097746	86097850	19.8493	-	ENSMUSG00000024135	Srbd1
chr2	155328623	155328711	19.8493	-	ENSMUSG00000038383	Pigu
chr2	32365856	32366062	19.8443	+	ENSMUSG00000039205	Ciz1
chr17	56433008	56433083	19.8236	-	ENSMUSG00000013236	Ptprs
chr8	111661382	111661487	19.8188	+	ENSMUSG00000055835	Zfp1
chr19	9000887	9001017	19.7876	+	ENSMUSG00000069833	Ahnak
chr15	102585702	102585788	19.7839	-	ENSMUSG00000052414	Gm28047
chr15	102585702	102585788	19.7839	-	ENSMUSG00000099083	Atf7
chr1	50951393	50951471	19.754	+	ENSMUSG00000026109	Tmeff2
chr1	131643356	131643494	19.754	+	ENSMUSG00000004552	Ctse
chr14	26596681	26596772	19.7513	+	ENSMUSG00000040818	Dennd6a
chr5	28073032	28073135	19.7513	+	ENSMUSG00000045294	Insig1
chr13	54961363	54961487	19.7485	+	ENSMUSG00000025876	Unc5a
chr4	117154535	117154609	19.7478	-	ENSMUSG00000047675	Rps8
chrX	73699028	73699131	19.7403	-	ENSMUSG00000002015	Bcap31
chr17	35154326	35154432	19.7231	-	ENSMUSG00000024393	Prrc2a
chr3	103980168	103980246	19.7195	+	ENSMUSG00000058388	Phtf1
chr7	122081944	122082044	19.6773	+	ENSMUSG00000030870	Ubfd1
chr12	80948797	80949086	19.657	+	ENSMUSG00000021134	Srsf5
chr12	85627755	85627832	19.6522	+	ENSMUSG00000034271	Jdp2
chr5	36795738	36795841	19.6439	-	ENSMUSG00000055302	Mrfap1
chr6	48471661	48471760	19.6434	+	ENSMUSG00000029797	Sspo
chr1	80272432	80272517	19.6392	-	ENSMUSG00000004364	Cul3
chr5	110005632	110005727	19.6357	+	ENSMUSG00000066613	Zfp932
chr1	158300989	158301086	19.6288	-	ENSMUSG00000004031	Brinp2
chr16	4117046	4117138	19.6168	-	ENSMUSG00000022521	Crebbp
chr15	75816879	75816986	19.606	-	ENSMUSG00000075600	Zc3h3
chr7	45347053	45347147	19.606	-	ENSMUSG00000003863	Ppfia3
chr8	105727215	105727359	19.606	-	ENSMUSG00000013150	Gfod2
chr14	70751496	70751609	19.6026	-	ENSMUSG00000022100	Xpo7
chr3	106570230	106570304	19.5825	+	ENSMUSG00000027900	Dram2
chr1	64829084	64829170	19.5663	-	ENSMUSG00000051344	Plekhm3
chr14	56810660	56810735	19.5663	-	ENSMUSG00000040123	Zmym5
chr11	52078982	52079072	19.5554	+	ENSMUSG00000020389	Cdkl3
chr9	20724774	20724918	19.5356	-	ENSMUSG00000032172	Olfm2
chr5	32964462	32964555	19.534	+	ENSMUSG00000037426	Depdc5
chr2	128853802	128853891	19.5294	+	ENSMUSG00000014353	Tmem87b
chr16	91170741	91170829	19.4913	-	ENSMUSG00000052471	Gm9881
chr2	125847591	125847677	19.4879	-	ENSMUSG00000027206	Cops2
chr4	123043482	123043575	19.4734	+	ENSMUSG00000028653	Trit1
chr11	119451310	119451394	19.4669	+	ENSMUSG00000070327	Rnf213
chr2	154598764	154598849	19.4592	-	ENSMUSG00000000876	Pxmp4
chr8	25195855	25195959	19.4592	-	ENSMUSG00000065954	Tacc1
chr17	22368543	22368638	19.4562	+	ENSMUSG00000044501	Zfp758
chr7	28767822	28767893	19.4511	+	ENSMUSG00000015149	Sirt2
chr7	45718531	45718654	19.4511	+	ENSMUSG00000059070	Rpl18
chr10	29349495	29349587	19.4355	-	ENSMUSG00000038876	Rnf146
chr13	12458726	12458896	19.4278	-	ENSMUSG00000057554	Lgals8
chr9	36722528	36722623	19.4278	-	ENSMUSG00000032113	Chek1
chr11	115196069	115196146	19.4076	+	ENSMUSG00000045980	Tmem104
chr7	118104383	118104542	19.3958	-	ENSMUSG00000008683	Rps15a
chr14	67046103	67046263	19.388	-	ENSMUSG00000022052	Ppp2r2a
chr12	83663672	83663751	19.3852	+	ENSMUSG00000010608	Rbm25
chr9	8022486	8022574	19.3798	-	ENSMUSG00000053070	9230110C19Rik
chr9	67023749	67023962	19.3782	-	ENSMUSG00000032366	Tpm1
chr8	90984420	90984498	19.3753	+	ENSMUSG00000056608	Chd9
chr8	119942180	119942374	19.3541	+	ENSMUSG00000031826	Usp10
chr10	43529776	43529864	19.3322	-	ENSMUSG00000019797	1700021F05Rik
chr5	108494213	108494295	19.3189	+	ENSMUSG00000033623	Pcgf3
chr1	193102897	193102985	19.3181	-	ENSMUSG00000016181	Diexf
chr6	113054514	113054607	19.3147	+	ENSMUSG00000030264	Thumpd3
chr17	6284700	6284798	19.2682	+	ENSMUSG00000038141	Tmem181a
chr3	122805318	122805419	19.2341	+	ENSMUSG00000053965	Pde5a
chr5	66273947	66274219	19.2341	+	ENSMUSG00000029206	Nsun7
chr11	20322078	20322166	19.2167	-	ENSMUSG00000020142	Slc1a4
chr19	44959021	44959133	19.2068	+	ENSMUSG00000036097	Fam178a
chr2	52721957	52722036	19.1964	-	ENSMUSG00000055371	Stam2
chr13	58160940	58161048	19.1955	+	ENSMUSG00000050002	Idnk
chr3	95939147	95939230	19.1955	+	ENSMUSG00000015749	Anp32e
chr14	32343564	32343666	19.1952	+	ENSMUSG00000021913	Ogdhl
chr2	38956049	38956163	19.1952	+	ENSMUSG00000046618	Olfml2a
chr15	76622096	76622211	19.1813	-	ENSMUSG00000059323	Tonsl
chr2	124094139	124094220	19.1793	+	ENSMUSG00000027200	Sema6d
chr5	129503330	129503444	19.1737	+	ENSMUSG00000029439	Sfswap
chr18	65987618	65987704	19.1594	-	ENSMUSG00000041891	Lman1
chr4	131780488	131780693	19.1566	-	ENSMUSG00000028909	Ptpru
chr4	132838835	132838938	19.1566	-	ENSMUSG00000028882	Ppp1r8
chr4	99216501	99216590	19.1534	+	ENSMUSG00000028550	Atg4c
chr9	115076619	115076710	19.1534	+	ENSMUSG00000040875	Osbpl10
chr8	3239377	3239461	19.1144	-	ENSMUSG00000005534	Insr
chr18	57389731	57389807	19.1108	+	ENSMUSG00000024594	Prrc1
chr7	97617003	97617118	19.1108	+	ENSMUSG00000035623	Rsf1
chr11	23492898	23493002	19.1005	-	ENSMUSG00000020288	Ahsa2
chr3	88416947	88417026	19.0891	-	ENSMUSG00000050144	Slc25a44
chr11	120880254	120880336	19.0824	-	ENSMUSG00000048445	Ccdc57
chr2	85028828	85028918	19.0313	-	ENSMUSG00000027071	P2rx3
chr1	172082359	172082449	19.0214	-	ENSMUSG00000003458	Ncstn
chr16	5012109	5012230	19.0122	-	ENSMUSG00000022540	Rogdi
chr18	53888065	53888157	19.0104	+	ENSMUSG00000073563	Csnk1g3
chr7	4138273	4138375	19.0104	+	ENSMUSG00000035545	Leng8
chr17	32315824	32316186	19.0059	-	ENSMUSG00000024045	Akap8
chr18	63670258	63670420	19.0059	-	ENSMUSG00000024583	Txnl1
chr2	127529758	127529860	18.9629	-	ENSMUSG00000027376	Prom2
chr11	100862521	100862602	18.961	+	ENSMUSG00000004043	Stat5a
chr15	25783909	25783988	18.961	+	ENSMUSG00000022272	Myo10
chr3	40549156	40549246	18.961	+	ENSMUSG00000060798	Intu
chr19	10433505	10433612	18.9374	+	ENSMUSG00000024743	Syt7
chr3	5246034	5246176	18.9352	+	ENSMUSG00000025255	Zfhx4
chr15	34500550	34500930	18.9288	+	ENSMUSG00000022325	Pop1
chr2	157557522	157557631	18.9197	-	ENSMUSG00000067787	Blcap
chr11	35580134	35580260	18.911	+	ENSMUSG00000056427	Slit3
chr15	93286944	93287027	18.874	-	ENSMUSG00000022634	Yaf2
chr7	92648835	92648932	18.8722	-	ENSMUSG00000041328	Pcf11
chr2	162933287	162933376	18.8717	+	ENSMUSG00000016921	Srsf6
chr14	77835197	77835280	18.8513	-	ENSMUSG00000022013	Dnajc15
chr7	127661439	127661585	18.8513	-	ENSMUSG00000030814	Bcl7c
chr11	97492647	97492751	18.8504	+	ENSMUSG00000049807	Arhgap23
chr14	20738222	20738366	18.8502	-	ENSMUSG00000021820	Camk2g
chr14	45290111	45290192	18.8502	-	ENSMUSG00000021831	Ero1l
chr11	87299675	87299772	18.8441	-	ENSMUSG00000046442	Ppm1e
chr11	87981237	87981363	18.8316	-	ENSMUSG00000020483	Dynll2
chr6	134449651	134449875	18.8161	-	ENSMUSG00000030201	Lrp6
chr2	119410381	119410460	18.8147	-	ENSMUSG00000034154	Ino80
chr2	165026847	165026957	18.8147	-	ENSMUSG00000039804	Ncoa5
chr4	56922301	56922382	18.7802	-	ENSMUSG00000055296	Tmem245
chr17	35242735	35242967	18.7742	+	ENSMUSG00000019432	Ddx39b
chr18	84485184	84485272	18.7637	-	ENSMUSG00000048410	Zfp407
chr2	69963013	69963096	18.76	+	ENSMUSG00000044308	Ubr3
chr2	158450276	158450351	18.76	+	ENSMUSG00000027652	Ralgapb
chr9	21663843	21663930	18.76	+	ENSMUSG00000032187	Smarca4
chr3	94378139	94378246	18.7538	+	ENSMUSG00000028150	Rorc
chr9	7822846	7822929	18.7362	-	ENSMUSG00000057367	Birc2
chr19	34216354	34216439	18.7316	+	ENSMUSG00000024776	Stambpl1
chr3	157543224	157543340	18.7262	+	ENSMUSG00000028180	Zranb2
chr9	105070555	105070640	18.7214	+	ENSMUSG00000032563	Mrpl3
chr1	74674809	74674891	18.7135	+	ENSMUSG00000033257	Ttll4
chr10	86025968	86026061	18.7135	+	ENSMUSG00000001786	Fbxo7
chr4	48596451	48596520	18.7135	+	ENSMUSG00000028347	Tmeff1
chr12	4599484	4599579	18.7093	+	ENSMUSG00000020640	Itsn2
chr18	34950518	34950655	18.6824	-	ENSMUSG00000024359	Hspa9
chr2	175138057	175138142	18.6519	-	ENSMUSG00000090093	Gm14399
chr15	58909635	58909795	18.6456	-	ENSMUSG00000050891	Tatdn1
chr15	11983999	11984091	18.6333	-	ENSMUSG00000022205	Sub1
chr2	27324371	27324451	18.6245	-	ENSMUSG00000009621	Vav2
chr2	63155334	63155411	18.6198	-	ENSMUSG00000059742	Kcnh7
chr2	134887818	134887906	18.6028	+	ENSMUSG00000051177	Plcb1
chr7	143067746	143067831	18.5971	+	ENSMUSG00000037706	Cd81
chr16	97955650	97955750	18.5971	-	ENSMUSG00000046962	Zbtb21
chr18	6436966	6437070	18.5881	-	ENSMUSG00000024240	Epc1
chr12	55401239	55401444	18.5801	+	ENSMUSG00000021024	Psma6
chr6	28676470	28676574	18.5799	+	ENSMUSG00000001424	Snd1
chr3	104456901	104457234	18.5678	-	ENSMUSG00000032913	Lrig2
chr15	58042497	58042600	18.5396	-	ENSMUSG00000022362	Gm29394
chr1	10157552	10157631	18.5237	-	ENSMUSG00000067851	Arfgef1
chr10	59329234	59329423	18.5216	+	ENSMUSG00000019916	P4ha1
chr10	25444092	25444181	18.5173	+	ENSMUSG00000019978	Epb41l2
chr17	31581234	31581311	18.5173	+	ENSMUSG00000006705	Pknox1
chr8	84974265	84974342	18.5173	+	ENSMUSG00000005161	Prdx2
chr5	43746621	43746762	18.5162	-	ENSMUSG00000039753	Fbxl5
chr5	115330070	115330186	18.5152	+	ENSMUSG00000029538	Srsf9
chr3	146947743	146947966	18.5116	+	ENSMUSG00000036745	Ttll7
chr7	80046575	80046664	18.5116	+	ENSMUSG00000048897	Zfp710
chr4	120745601	120745718	18.493	-	ENSMUSG00000028631	Kcnq4
chr7	143696634	143696723	18.493	-	ENSMUSG00000037606	Osbpl5
chr1	136034914	136035012	18.4911	+	ENSMUSG00000026411	Tmem9
chr18	45636405	45636480	18.4911	+	ENSMUSG00000054477	Kcnn2
chr1	75262346	75262469	18.4663	-	ENSMUSG00000026204	Ptprn
chr2	152791745	152791822	18.4663	-	ENSMUSG00000007659	Bcl2l1
chr1	133296643	133296733	18.4575	+	ENSMUSG00000041757	Plekha6
chr8	85538845	85538936	18.4537	-	ENSMUSG00000031701	Dnaja2
chr17	69253244	69253335	18.4529	+	ENSMUSG00000024044	Epb41l3
chr2	130277671	130277766	18.4529	+	ENSMUSG00000027405	Nop56
chr11	72613541	72613628	18.4307	+	ENSMUSG00000020794	Ube2g1
chr15	79303379	79303470	18.4298	-	ENSMUSG00000042632	Pla2g6
chr6	86978249	86978387	18.4157	+	ENSMUSG00000057230	Aak1
chr19	45762302	45762399	18.4156	-	ENSMUSG00000025220	Mgea5
chr6	91758807	91758913	18.4095	+	ENSMUSG00000030096	Slc6a6
chr10	81367042	81367160	18.4026	-	ENSMUSG00000020235	Fzr1
chr5	107474541	107474626	18.401	+	ENSMUSG00000070632	Btbd8
chr8	105926482	105926579	18.401	+	ENSMUSG00000048310	Pskh1
chr10	40251999	40252085	18.36	-	ENSMUSG00000019837	Gtf3c6
chr13	46769324	46769409	18.36	-	ENSMUSG00000021375	Kif13a
chr18	34346961	34347042	18.36	-	ENSMUSG00000005873	Reep5
chr11	21113953	21114054	18.3597	+	ENSMUSG00000020134	Peli1
chr9	110382301	110382376	18.3589	+	ENSMUSG00000032485	Scap
chr1	85721143	85721227	18.3448	-	ENSMUSG00000052760	A630001G21Rik
chr10	81030764	81030840	18.3448	-	ENSMUSG00000046822	Slc39a3
chr11	89047358	89047436	18.3448	-	ENSMUSG00000000276	Dgke
chr6	12668862	12668935	18.3448	-	ENSMUSG00000032625	Thsd7a
chr7	35280625	35280743	18.3448	-	ENSMUSG00000063808	Gpatch1
chr10	127174435	127174569	18.3368	-	ENSMUSG00000040441	Slc26a10
chr1	75404712	75404799	18.3352	+	ENSMUSG00000026207	Speg
chr9	56058401	56058563	18.3352	+	ENSMUSG00000032320	Rcn2
chr15	36597425	36597502	18.3318	-	ENSMUSG00000022283	Pabpc1
chrX	10487892	10487994	18.3274	+	ENSMUSG00000058254	Tspan7
chrX	20856596	20856790	18.2995	+	ENSMUSG00000001127	Araf
chr2	106962695	106962782	18.2937	-	ENSMUSG00000027122	Arl14ep
chr4	118217712	118217850	18.2937	-	ENSMUSG00000033295	Ptprf
chr3	8520869	8521054	18.2928	+	ENSMUSG00000027500	Stmn2
chr15	79823936	79824069	18.289	-	ENSMUSG00000089837	Npcd
chr15	79823936	79824069	18.289	-	ENSMUSG00000089715	Cbx6
chr5	38073224	38073331	18.2694	+	ENSMUSG00000029125	Stx18
chr12	91136952	91137038	18.2641	-	ENSMUSG00000061533	Cep128
chr8	70839457	70839557	18.2641	-	ENSMUSG00000002910	Arrdc2
chr6	29421846	29421971	18.2606	+	ENSMUSG00000029769	Ccdc136
chr6	124739208	124739340	18.2441	-	ENSMUSG00000072772	Grcc10
chr19	37055031	37055111	18.241	-	ENSMUSG00000039652	Cpeb3
chr13	14197209	14197288	18.2095	+	ENSMUSG00000039219	Arid4b
chr6	8703661	8703753	18.209	-	ENSMUSG00000062995	Ica1
chr14	10399240	10399320	18.2067	-	ENSMUSG00000060579	Fhit
chr19	42776649	42776728	18.2067	-	ENSMUSG00000025188	Hps1
chr2	26596535	26596611	18.2067	-	ENSMUSG00000026922	Agpat2
chr7	119869663	119869817	18.2067	-	ENSMUSG00000048787	Dcun1d3
chr8	126590825	126590947	18.2052	-	ENSMUSG00000051495	Irf2bp2
chr16	18503036	18503191	18.2041	+	ENSMUSG00000000884	Gnb1l
chr7	81587227	81587301	18.2041	+	ENSMUSG00000045795	Whamm
chr12	55054771	55054851	18.1947	-	ENSMUSG00000062198	2700097O09Rik
chr16	22435033	22435192	18.1947	-	ENSMUSG00000013089	Etv5
chr8	122484545	122484662	18.1908	-	ENSMUSG00000014444	Piezo1
chr12	98240873	98240964	18.1566	-	ENSMUSG00000021003	Galc
chr3	65251872	65251961	18.1513	+	ENSMUSG00000027827	Kcnab1
chr5	136107232	136107317	18.1513	+	ENSMUSG00000004952	Rasa4
chr9	3575877	3575950	18.1513	+	ENSMUSG00000041624	Gucy1a2
chr19	27951399	27951513	18.1457	-	ENSMUSG00000040929	Rfx3
chr4	70382583	70382663	18.1457	-	ENSMUSG00000039298	Cdk5rap2
chr11	35833104	35833182	18.1411	-	ENSMUSG00000018848	Rars
chr5	34180997	34181258	18.1151	-	ENSMUSG00000037235	Mxd4
chr6	40359306	40359387	18.112	+	ENSMUSG00000029916	Agk
chr11	98153699	98153793	18.0856	-	ENSMUSG00000018160	Med1
chr6	125467251	125467331	18.0856	-	ENSMUSG00000030342	Cd9
chr10	75710556	75710706	18.0847	-	ENSMUSG00000020196	Cabin1
chr16	3915569	3915658	18.0808	+	ENSMUSG00000093575	Gm20695
chr16	3915569	3915658	18.0808	+	ENSMUSG00000014232	Cluap1
chr3	69009826	69009907	18.0808	+	ENSMUSG00000034349	Smc4
chrX	136739971	136740050	18.0732	-	ENSMUSG00000031422	Morf4l2
chr9	37517042	37517214	18.068	+	ENSMUSG00000042138	Msantd2
chr8	123089928	123090000	18.0628	+	ENSMUSG00000000738	Spg7
chr11	100715245	100715368	18.0583	-	ENSMUSG00000019173	Rab5c
chr9	108351768	108351895	18.0525	+	ENSMUSG00000032612	Usp4
chr8	111489017	111489102	18.0408	-	ENSMUSG00000031959	Wdr59
chr19	8711949	8712136	18.0039	-	ENSMUSG00000010095	Slc3a2
chr19	29015469	29015664	17.9994	+	ENSMUSG00000024780	Cdc37l1
chr2	84641413	84641514	17.9827	-	ENSMUSG00000034101	Ctnnd1
chr2	84641413	84641514	17.9827	-	ENSMUSG00000101645	Gm28635
chr3	96240225	96240302	17.98	-	ENSMUSG00000063954	Hist2h2aa2
chr6	148796469	148796574	17.98	-	ENSMUSG00000040029	Ipo8
chr5	143520356	143520464	17.9755	-	ENSMUSG00000001847	Rac1
chr4	137617459	137617596	17.9702	+	ENSMUSG00000043411	Usp48
chr11	29529351	29529471	17.9687	+	ENSMUSG00000020459	Mtif2
chr1	170145159	170145338	17.9656	-	ENSMUSG00000026670	Uap1
chr8	124895305	124895511	17.9656	-	ENSMUSG00000074030	Exoc8
chr18	47269506	47269582	17.9654	-	ENSMUSG00000019647	Sema6a
chr8	26048099	26048203	17.9654	-	ENSMUSG00000037234	Hook3
chr14	24495571	24495670	17.9603	+	ENSMUSG00000025290	Rps24
chr8	124253100	124253236	17.9603	+	ENSMUSG00000089704	Galnt2
chr17	24342814	24342888	17.9495	-	ENSMUSG00000035435	Abca17
chr13	55071499	55071624	17.9405	-	ENSMUSG00000025878	Uimc1
chr8	4247561	4247647	17.9154	+	ENSMUSG00000002948	Map2k7
chr8	109672326	109672428	17.9084	-	ENSMUSG00000031729	Ist1
chr5	144276204	144276299	17.9084	-	ENSMUSG00000038859	Baiap2l1
chr5	31553926	31554031	17.9038	+	ENSMUSG00000029141	Slc4a1ap
chr16	91663708	91663826	17.9015	+	ENSMUSG00000022961	Son
chr9	79715129	79715322	17.8939	-	ENSMUSG00000032332	Col12a1
chr2	5890014	5890164	17.8866	-	ENSMUSG00000025816	Sec61a2
chr11	117774681	117774938	17.8824	-	ENSMUSG00000025572	Tmc6
chr4	126251137	126251269	17.8824	-	ENSMUSG00000028849	Map7d1
chr13	84261477	84261569	17.8756	+	ENSMUSG00000035762	Tmem161b
chr4	136051769	136051859	17.8702	-	ENSMUSG00000059291	Rpl11
chr5	142903352	142903435	17.8702	-	ENSMUSG00000029580	Actb
chr5	34385099	34385238	17.8589	+	ENSMUSG00000037210	Fam193a
chrX	107787033	107787120	17.8452	-	ENSMUSG00000031242	2610002M06Rik
chr17	24076713	24076807	17.8132	-	ENSMUSG00000024122	Pdpk1
chr12	21410210	21410309	17.8064	-	ENSMUSG00000076432	Ywhaq
chrX	41908049	41908129	17.8064	-	ENSMUSG00000037475	Thoc2
chrX	67685512	67685628	17.8038	-	ENSMUSG00000079578	Gm1140
chr2	167064991	167065082	17.8007	+	ENSMUSG00000074578	1500012F01Rik
chr18	35363825	35363910	17.7901	-	ENSMUSG00000024357	Sil1
chr8	3388875	3388970	17.7839	+	ENSMUSG00000074497	A430078G23Rik
chr9	56483330	56483421	17.7839	+	ENSMUSG00000032329	Hmg20a
chr17	87332428	87332512	17.7671	+	ENSMUSG00000036918	Ttc7
chr2	130753497	130753605	17.7666	-	ENSMUSG00000027309	4930402H24Rik
chr11	97781643	97781720	17.7393	-	ENSMUSG00000071415	Rpl23
chr17	12919172	12919304	17.7357	+	ENSMUSG00000068039	Tcp1
chr17	46120716	46120949	17.7357	+	ENSMUSG00000023967	Mrps18a
chr12	35087472	35087557	17.734	+	ENSMUSG00000020590	Snx13
chr8	94291576	94291677	17.734	+	ENSMUSG00000032939	Nup93
chr19	44306507	44306839	17.7324	+	ENSMUSG00000025203	Scd2
chr15	98932863	98932951	17.7266	-	ENSMUSG00000023004	Tuba1b
chr10	30547933	30548101	17.7225	-	ENSMUSG00000019792	Trmt11
chr2	39187168	39187319	17.7225	-	ENSMUSG00000035236	Scai
chr19	46511140	46511237	17.7212	+	ENSMUSG00000025034	Trim8
chrX	159536904	159536985	17.7212	+	ENSMUSG00000044150	A830080D01Rik
chr1	185308145	185308234	17.6819	-	ENSMUSG00000026618	Iars2
chr16	17171298	17171374	17.6763	-	ENSMUSG00000038965	Ube2l3
chr10	128085604	128085702	17.6604	+	ENSMUSG00000025393	Atp5b
chr12	70978819	70978913	17.6604	+	ENSMUSG00000060073	Psma3
chr11	22163631	22163707	17.6489	-	ENSMUSG00000042302	Ehbp1
chr7	126692141	126692217	17.6481	-	ENSMUSG00000059772	Slx1b
chr16	91033465	91033547	17.6466	-	ENSMUSG00000022974	Paxbp1
chr5	21041407	21041501	17.638	-	ENSMUSG00000028771	Ptpn12
chr11	17192787	17192880	17.6321	+	ENSMUSG00000033953	Ppp3r1
chr8	105334128	105334236	17.6195	+	ENSMUSG00000014856	Tmem208
chr13	67544526	67544621	17.6161	-	ENSMUSG00000095432	Zfp748
chr16	89886149	89886233	17.6161	-	ENSMUSG00000002489	Tiam1
chr9	57642395	57642502	17.6161	-	ENSMUSG00000032312	Csk
chr14	70486532	70486710	17.6138	-	ENSMUSG00000022098	Bmp1
chr14	118145063	118145254	17.6047	+	ENSMUSG00000022131	Gpr180
chr17	35051452	35051536	17.6047	+	ENSMUSG00000007041	Clic1
chr12	32827329	32827507	17.6043	+	ENSMUSG00000020572	Nampt
chr12	111115216	111115301	17.6043	+	ENSMUSG00000037896	Rcor1
chr15	100233521	100233641	17.602	+	ENSMUSG00000023027	Atf1
chr17	28259771	28260077	17.5881	+	ENSMUSG00000002250	Ppard
chr15	98523589	98523701	17.5604	-	ENSMUSG00000022992	Kansl2
chr11	54482413	54482508	17.5543	+	ENSMUSG00000035992	Fnip1
chr8	122393352	122393491	17.549	+	ENSMUSG00000017478	Zc3h18
chr14	60813414	60813511	17.546	+	ENSMUSG00000021993	Mipep
chr6	72611896	72611991	17.5047	-	ENSMUSG00000056429	Tgoln1
chr9	101098173	101098256	17.4979	+	ENSMUSG00000066415	Msl2
chr16	10605461	10605619	17.4937	+	ENSMUSG00000068663	Clec16a
chr11	77855563	77855651	17.4909	+	ENSMUSG00000000631	Myo18a
chr14	61414392	61414463	17.4898	-	ENSMUSG00000021929	Kpna3
chr17	74256351	74256428	17.4888	-	ENSMUSG00000058704	Memo1
chr8	106263483	106263590	17.4888	-	ENSMUSG00000031906	Smpd3
chr2	180172736	180172848	17.4834	+	ENSMUSG00000039041	Adrm1
chr5	38269372	38269451	17.4834	+	ENSMUSG00000067365	Tmem128
chr7	46855398	46855614	17.4834	+	ENSMUSG00000063229	Ldha
chr19	31084956	31085062	17.4823	+	ENSMUSG00000053536	Cstf2t
chrX	152263386	152263486	17.4672	+	ENSMUSG00000025332	Kdm5c
chr13	58191644	58191727	17.4585	-	ENSMUSG00000005312	Ubqln1
chr6	92182791	92182886	17.4478	-	ENSMUSG00000014551	Mrps25
chr5	103548935	103549125	17.4409	+	ENSMUSG00000034573	Ptpn13
chr10	105786580	105786670	17.3921	-	ENSMUSG00000036009	Mettl25
chr13	56095190	56095317	17.3853	-	ENSMUSG00000015937	H2afy
chr5	116535698	116535777	17.3853	-	ENSMUSG00000063919	Srrm4
chr14	47688498	47688577	17.3852	+	ENSMUSG00000021843	Ktn1
chr1	93548455	93548557	17.3783	+	ENSMUSG00000034066	Farp2
chr13	55741283	55741374	17.3783	+	ENSMUSG00000021496	Pcbd2
chr10	81349722	81349830	17.3651	-	ENSMUSG00000020232	Hmg20b
chr7	34388797	34388873	17.3651	-	ENSMUSG00000066568	Lsm14a
chr15	79528358	79528596	17.3614	-	ENSMUSG00000055065	Ddx17
chr7	92810088	92810174	17.3464	+	ENSMUSG00000030643	Rab30
chr19	9111495	9111574	17.3394	-	ENSMUSG00000024654	Asrgl1
chr4	126752447	126752539	17.3394	-	ENSMUSG00000028833	Ncdn
chr8	88209854	88209929	17.3112	+	ENSMUSG00000036779	Papd5
chr11	103937646	103937732	17.311	-	ENSMUSG00000034187	Nsf
chr2	163625171	163625253	17.3107	-	ENSMUSG00000017707	Serinc3
chr10	127228196	127228392	17.3091	-	ENSMUSG00000074657	Kif5a
chr2	91894726	91894826	17.3037	+	ENSMUSG00000040506	Ambra1
chr15	80250416	80250493	17.303	+	ENSMUSG00000022412	Mief1
chr2	152687813	152687922	17.303	+	ENSMUSG00000019188	H13
chr2	152687813	152687922	17.303	+	ENSMUSG00000042814	Mcts2
chr8	56582765	56582851	17.3028	+	ENSMUSG00000038206	Fbxo8
chr5	3802095	3802204	17.3023	-	ENSMUSG00000040351	Ankib1
chrX	12742924	12743000	17.3023	-	ENSMUSG00000064127	Med14
chr13	100182838	100182913	17.2768	-	ENSMUSG00000078945	Naip2
chr17	26050297	26050403	17.2768	-	ENSMUSG00000037098	Rab11fip3
chr7	96843998	96844087	17.269	+	ENSMUSG00000048078	Tenm4
chr12	51643899	51643978	17.2453	-	ENSMUSG00000020954	Strn3
chr18	37940207	37940321	17.2422	-	ENSMUSG00000024454	Hdac3
chr10	63022705	63022843	17.2405	-	ENSMUSG00000020069	Hnrnph3
chr4	41518766	41518859	17.2234	-	ENSMUSG00000028439	Fam219a
chr7	105373983	105374076	17.2234	-	ENSMUSG00000044465	Fam160a2
chr13	73940293	73940398	17.2148	+	ENSMUSG00000057649	Brd9
chr5	52157616	52157714	17.2124	-	ENSMUSG00000029169	Dhx15
chr6	51466449	51466547	17.2123	-	ENSMUSG00000004980	Hnrnpa2b1
chr12	36015124	36015208	17.2118	-	ENSMUSG00000020577	Tspan13
chr12	83799318	83799498	17.2118	-	ENSMUSG00000021224	Numb
chr15	99976633	99976711	17.1707	+	ENSMUSG00000023025	Larp4
chr13	100281183	100281287	17.1684	-	ENSMUSG00000078942	Naip6
chr15	31465264	31465387	17.1634	-	ENSMUSG00000039100	2016-03-06
chr5	100791299	100791378	17.1549	-	ENSMUSG00000035266	Helq
chr2	140520697	140520780	17.1455	+	ENSMUSG00000068205	Macrod2
chr6	72361739	72361848	17.1355	-	ENSMUSG00000055850	Rnf181
chrX	147790585	147790669	17.1258	+	ENSMUSG00000095872	Gm15128
chr6	134766003	134766078	17.1224	-	ENSMUSG00000030203	Dusp16
chr9	52155939	52156022	17.1224	-	ENSMUSG00000035164	Zc3h12c
chr1	37417591	37417700	17.1206	-	ENSMUSG00000026112	Coa5
chr14	66803158	66803298	17.1204	-	ENSMUSG00000022048	Dpysl2
chr9	62880124	62880222	17.1191	-	ENSMUSG00000032405	Pias1
chr19	4789792	4789925	17.1167	-	ENSMUSG00000096370	Gm21992
chr19	4789792	4789925	17.1167	-	ENSMUSG00000094936	Rbm4
chr5	31070685	31070767	17.113	+	ENSMUSG00000013629	Cad
chr7	141451273	141451356	17.113	+	ENSMUSG00000025508	Rplp2
chr7	27639340	27639424	17.1109	+	ENSMUSG00000004056	Akt2
chr10	78459911	78460000	17.0956	-	ENSMUSG00000032788	Pdxk
chr17	28201753	28201830	17.0891	+	ENSMUSG00000024220	Zfp523
chr11	120628578	120628751	17.0756	-	ENSMUSG00000051510	Mafg
chr1	10108141	10108244	17.0533	+	ENSMUSG00000056763	Cspp1
chr8	14935584	14935679	17.0533	+	ENSMUSG00000071176	Arhgef10
chr19	6376918	6377081	17.0514	+	ENSMUSG00000024949	Sf1
chr4	117561642	117561794	17.0514	+	ENSMUSG00000033423	Eri3
chr5	92145080	92145195	17.0216	+	ENSMUSG00000029407	Uso1
chr5	144106905	144106996	17.0216	+	ENSMUSG00000038970	Lmtk2
chr6	83727981	83728088	17.0216	+	ENSMUSG00000034777	Vax2
chr8	95426314	95426393	17.0154	-	ENSMUSG00000031796	Cfap20
chr8	70700530	70700614	17.0102	+	ENSMUSG00000071076	Jund
chr12	3876442	3876616	16.9907	+	ENSMUSG00000020661	Dnmt3a
chr2	74861216	74861292	16.9907	+	ENSMUSG00000027099	Mtx2
chr13	8825502	8825583	16.9698	-	ENSMUSG00000021147	Wdr37
chr10	128548746	128548840	16.9661	-	ENSMUSG00000093674	Rpl41
chr12	4305469	4305552	16.9661	-	ENSMUSG00000020647	Ncoa1
chr11	54696531	54696625	16.9609	+	ENSMUSG00000037533	Rapgef6
chr7	5080595	5080841	16.9597	+	ENSMUSG00000035203	Epn1
chr19	42055741	42055858	16.9572	+	ENSMUSG00000025176	Hoga1
chr7	48819523	48819605	16.9572	+	ENSMUSG00000030471	Zdhhc13
chr9	62341540	62341627	16.9571	+	ENSMUSG00000032249	Anp32a
chr4	141125932	141126028	16.9564	-	ENSMUSG00000040842	Szrd1
chr19	36956553	36956636	16.9535	+	ENSMUSG00000040565	Btaf1
chr1	78707156	78707236	16.9476	+	ENSMUSG00000032883	Acsl3
chr11	49883515	49883600	16.9476	+	ENSMUSG00000020366	Mapk9
chr1	87542924	87543048	16.9382	-	ENSMUSG00000026259	Ngef
chr3	97239295	97239379	16.9382	-	ENSMUSG00000038256	Bcl9
chr2	173739025	173739220	16.932	+	ENSMUSG00000054455	Vapb
chr8	106232599	106232698	16.932	+	ENSMUSG00000060098	Prmt7
chr4	152260620	152260712	16.9295	+	ENSMUSG00000028937	Acot7
chr16	48949693	48949781	16.9238	-	ENSMUSG00000064061	Dzip3
chr5	100394190	100394292	16.9238	-	ENSMUSG00000035325	Sec31a
chr5	131466261	131466352	16.9238	-	ENSMUSG00000029673	Auts2
chr15	99394682	99394783	16.9149	+	ENSMUSG00000023010	Tmbim6
chr15	5160747	5160861	16.9086	+	ENSMUSG00000050697	Prkaa1
chr11	94112534	94112700	16.8954	+	ENSMUSG00000020859	Spag9
chr7	81448254	81448386	16.876	-	ENSMUSG00000025586	Cpeb1
chr15	36485058	36485171	16.8524	-	ENSMUSG00000048307	Ankrd46
chr2	134631606	134631684	16.8524	-	ENSMUSG00000034723	Tmx4
chr3	8929652	8929748	16.8524	-	ENSMUSG00000027506	Tpd52
chr5	67339455	67339560	16.843	+	ENSMUSG00000029221	Slc30a9
chr7	66128365	66128469	16.843	+	ENSMUSG00000032640	Chsy1
chr18	32411933	32412103	16.8429	+	ENSMUSG00000024381	Bin1
chr1	53291741	53291831	16.8423	-	ENSMUSG00000026098	Pms1
chr7	140954840	140954950	16.8416	-	ENSMUSG00000060591	Ifitm2
chr6	87847288	87847480	16.8408	-	ENSMUSG00000030057	Cnbp
chr5	118111395	118111476	16.8393	-	ENSMUSG00000032867	Fbxw8
chr9	15710129	15710207	16.8326	+	ENSMUSG00000043885	Slc36a4
chr19	8970321	8970453	16.8206	+	ENSMUSG00000071644	Eef1g
chr14	36885843	36885928	16.8147	-	ENSMUSG00000058690	Ccser2
chr19	10859158	10859306	16.8147	-	ENSMUSG00000024736	Tmem132a
chr7	97095684	97095756	16.8044	+	ENSMUSG00000004508	Gab2
chr15	12249685	12249777	16.7632	+	ENSMUSG00000039458	Mtmr12
chr3	69752861	69752942	16.7632	+	ENSMUSG00000027787	Nmd3
chr5	134277885	134277969	16.7616	-	ENSMUSG00000060261	Gtf2i
chr13	13799909	13799985	16.7572	+	ENSMUSG00000021303	Gng4
chr14	55893580	55893682	16.7572	+	ENSMUSG00000047153	Khnyn
chr2	155499175	155499293	16.7507	-	ENSMUSG00000027603	Ggt7
chr10	30753053	30753140	16.7472	-	ENSMUSG00000039697	Ncoa7
chr17	46542022	46542112	16.7472	-	ENSMUSG00000040327	Cul9
chrX	57442759	57442854	16.7449	+	ENSMUSG00000079584	Gm364
chr18	36958195	36958298	16.7379	+	ENSMUSG00000103442	Pcdha1
chr18	36958195	36958298	16.7379	+	ENSMUSG00000104148	Pcdha2
chr18	36958195	36958298	16.7379	+	ENSMUSG00000102312	Pcdha3
chr18	36958195	36958298	16.7379	+	ENSMUSG00000104252	Pcdha4
chr2	57313844	57313922	16.7379	+	ENSMUSG00000026827	Gpd2
chr2	157050535	157050656	16.7206	-	ENSMUSG00000055485	Soga1
chr12	55605558	55605674	16.7135	-	ENSMUSG00000021027	Ralgapa1
chr15	61985929	61986011	16.7108	+	ENSMUSG00000022346	Myc
chr19	57719093	57719176	16.7108	+	ENSMUSG00000054843	Atrnl1
chr2	71522191	71522359	16.7108	+	ENSMUSG00000041921	Metap1d
chr6	18219912	18219998	16.7108	+	ENSMUSG00000041301	Cftr
chr12	24660597	24660675	16.6932	+	ENSMUSG00000020653	Klf11
chr14	63742880	63743128	16.6897	+	ENSMUSG00000035067	Xkr6
chr2	132791085	132791190	16.6897	+	ENSMUSG00000027350	Chgb
chrX	68711287	68711371	16.6897	+	ENSMUSG00000000838	Fmr1
chr2	53168574	53168692	16.6854	-	ENSMUSG00000061136	Prpf40a
chr13	58391189	58391432	16.6852	-	ENSMUSG00000021546	Hnrnpk
chr19	47342578	47342660	16.6814	-	ENSMUSG00000053617	Sh3pxd2a
chr4	141047257	141047500	16.6814	-	ENSMUSG00000040860	Crocc
chr5	32852380	32852522	16.6814	-	ENSMUSG00000054280	Prr14l
chr15	81704245	81704377	16.6507	-	ENSMUSG00000022391	Rangap1
chr16	94283016	94283116	16.6507	-	ENSMUSG00000040820	Hlcs
chr14	57882647	57882891	16.6442	-	ENSMUSG00000021969	Zdhhc20
chr13	35023868	35024091	16.6431	-	ENSMUSG00000021417	Eci2
chr13	112858887	112858997	16.6415	+	ENSMUSG00000021759	Ppap2a
chr1	191333732	191333832	16.6403	+	ENSMUSG00000026627	Tmem206
chr11	68904487	68904613	16.6403	+	ENSMUSG00000060938	Rpl26
chr2	129815982	129816058	16.6403	+	ENSMUSG00000037885	Stk35
chr14	120943396	120943469	16.6342	+	ENSMUSG00000030662	Ipo5
chr15	96584151	96584279	16.6297	-	ENSMUSG00000023169	Slc38a1
chr12	102403988	102404155	16.626	-	ENSMUSG00000021190	Lgmn
chr7	98609502	98609644	16.626	-	ENSMUSG00000035401	2210018M11Rik
chr6	86524668	86524883	16.6008	-	ENSMUSG00000051695	Pcbp1
chr8	119550310	119550399	16.6008	-	ENSMUSG00000031835	Mbtps1
chr6	113334724	113334812	16.5974	-	ENSMUSG00000030272	Camk1
chr4	140587788	140587893	16.597	-	ENSMUSG00000040964	Arhgef10l
chr17	32053972	32054085	16.5904	+	ENSMUSG00000058392	Rrp1b
chr2	120666093	120666183	16.5904	+	ENSMUSG00000033705	Stard9
chr7	112429229	112429308	16.5869	+	ENSMUSG00000030770	Parva
chr9	25272887	25272964	16.5869	+	ENSMUSG00000001833	2016-09-07
chr2	6585998	6586076	16.5846	-	ENSMUSG00000002107	Celf2
chrX	12658218	12658312	16.5631	-	ENSMUSG00000044148	1810030O07Rik
chr10	121623482	121623575	16.5556	-	ENSMUSG00000034667	Xpot
chr17	88003675	88003772	16.5556	-	ENSMUSG00000005371	Fbxo11
chr3	75903645	75903736	16.554	-	ENSMUSG00000034109	Golim4
chr9	106462752	106462839	16.5523	+	ENSMUSG00000023495	Pcbp4
chr11	45909930	45910078	16.5425	+	ENSMUSG00000006169	Clint1
chr15	84211926	84212066	16.5425	+	ENSMUSG00000022437	Samm50
chr9	78451389	78451479	16.5425	+	ENSMUSG00000032342	Mto1
chr11	116022720	116022886	16.5422	-	ENSMUSG00000016559	H3f3b
chr5	123713978	123714068	16.5159	-	ENSMUSG00000029427	Zcchc8
chr10	62769290	62769429	16.5117	-	ENSMUSG00000020074	Ccar1
chr8	46207441	46207546	16.5117	-	ENSMUSG00000031633	Slc25a4
chr19	5743572	5743655	16.5102	+	ENSMUSG00000024940	Ltbp3
chr19	42553861	42553945	16.5102	+	ENSMUSG00000025184	R3hcc1l
chr2	167017116	167017207	16.5102	+	ENSMUSG00000017999	Ddx27
chr1	5142138	5142218	16.5049	+	ENSMUSG00000033793	Atp6v1h
chr13	119462794	119462940	16.4979	+	ENSMUSG00000062822	4833420G17Rik
chr4	135863173	135863249	16.487	+	ENSMUSG00000028676	Srsf10
chr4	87789406	87789541	16.486	-	ENSMUSG00000028496	Mllt3
chr9	21579301	21579380	16.4744	+	ENSMUSG00000032185	Carm1
chr15	75672175	75672275	16.4568	-	ENSMUSG00000000934	Top1mt
chr2	24854692	24854767	16.4568	-	ENSMUSG00000036893	Ehmt1
chr15	99301592	99301694	16.4495	+	ENSMUSG00000023007	Prpf40b
chr2	37785414	37785511	16.446	+	ENSMUSG00000035403	Crb2
chr6	48556373	48556467	16.446	+	ENSMUSG00000073096	Lrrc61
chr16	87701872	87701960	16.4219	+	ENSMUSG00000025612	Bach1
chr7	109032789	109032890	16.4219	+	ENSMUSG00000031028	Tub
chr3	79555073	79555149	16.4128	-	ENSMUSG00000061175	Fnip2
chr5	76295583	76295673	16.3939	-	ENSMUSG00000029238	Clock
chr5	137300452	137300530	16.3857	-	ENSMUSG00000037364	Srrt
chr10	13768293	13768372	16.3849	-	ENSMUSG00000019806	Aig1
chr4	62194249	62194336	16.3849	-	ENSMUSG00000028389	Zfp37
chr10	93474318	93474396	16.3834	+	ENSMUSG00000015889	Lta4h
chr3	41632805	41632895	16.3806	-	ENSMUSG00000059834	Sclt1
chr10	82630956	82631037	16.3744	+	ENSMUSG00000034674	Tdg
chr15	55621126	55621205	16.3744	+	ENSMUSG00000022369	Mtbp
chr18	53373418	53373513	16.3744	+	ENSMUSG00000024535	Snx24
chr9	48450773	48450887	16.3744	+	ENSMUSG00000063543	Gm5616
chr3	68994444	68994552	16.3712	-	ENSMUSG00000027778	Ift80
chr18	25498014	25498098	16.3669	-	ENSMUSG00000024268	Celf4
chr18	61713195	61713268	16.3669	-	ENSMUSG00000024580	Grpel2
chr11	88979935	88980097	16.3606	+	ENSMUSG00000033983	Coil
chr4	124703138	124703236	16.3606	+	ENSMUSG00000032643	Fhl3
chr2	156928329	156928485	16.3528	-	ENSMUSG00000027634	Ndrg3
chr5	112917101	112917276	16.3445	-	ENSMUSG00000042249	Adrbk2
chr9	71479081	71479236	16.3445	-	ENSMUSG00000032199	Polr2m
chr10	79862057	79862151	16.3418	+	ENSMUSG00000006498	Ptbp1
chr4	137335780	137335875	16.335	-	ENSMUSG00000006699	Cdc42
chr11	98833627	98833753	16.3328	+	ENSMUSG00000078676	Casc3
chr8	22681499	22681654	16.3084	-	ENSMUSG00000031537	Ikbkb
chr5	146260976	146261105	16.2964	+	ENSMUSG00000029635	Cdk8
chr1	36425131	36425243	16.2729	-	ENSMUSG00000001143	Lman2l
chr1	177770170	177770243	16.2676	-	ENSMUSG00000015961	Adss
chr1	172155577	172155717	16.2605	+	ENSMUSG00000026554	Dcaf8
chr4	125504888	125504966	16.2605	+	ENSMUSG00000001985	Grik3
chrX	152048255	152048339	16.2605	+	ENSMUSG00000041133	Smc1a
chr4	139403281	139403360	16.2603	+	ENSMUSG00000066036	Ubr4
chr5	67419142	67419268	16.2599	-	ENSMUSG00000092060	Bend4
chr2	12934609	12934688	16.2558	+	ENSMUSG00000026730	Pter
chr16	91788433	91788519	16.2477	+	ENSMUSG00000022957	Itsn1
chr10	59884921	59885015	16.2325	+	ENSMUSG00000020109	Dnajb12
chr7	6390535	6390651	16.2325	+	ENSMUSG00000062861	Zfp28
chr2	73833039	73833184	16.2155	-	ENSMUSG00000027104	Atf2
chr17	24917200	24917291	16.2132	-	ENSMUSG00000024163	Mapk8ip3
chr16	32841062	32841166	16.2067	-	ENSMUSG00000035629	1700021K19Rik
chr2	77898425	77898519	16.2067	-	ENSMUSG00000027014	Cwc22
chr11	118018863	118018994	16.2028	+	ENSMUSG00000017715	Pgs1
chr13	54381199	54381360	16.2016	+	ENSMUSG00000025867	Cplx2
chr1	42887948	42888028	16.2015	+	ENSMUSG00000060679	Mrps9
chr2	152253898	152253977	16.1945	+	ENSMUSG00000074698	Csnk2a1
chr8	117460208	117460290	16.1945	+	ENSMUSG00000034390	Cmip
chr9	21397111	21397192	16.1945	+	ENSMUSG00000032178	Ilf3
chr9	102894630	102894705	16.1945	+	ENSMUSG00000032547	Ryk
chr3	138471640	138471729	16.1943	-	ENSMUSG00000005813	Metap1
chr18	64356257	64356331	16.1819	+	ENSMUSG00000045991	Onecut2
chr2	25010444	25010547	16.1819	+	ENSMUSG00000036833	Pnpla7
chr11	53678528	53678646	16.1756	-	ENSMUSG00000020380	Rad50
chr13	4606381	4606465	16.1756	-	ENSMUSG00000045410	Akr1e1
chr3	90398072	90398163	16.1756	-	ENSMUSG00000027933	Ints3
chr4	131954034	131954106	16.1756	-	ENSMUSG00000028906	Epb41
chr10	127304856	127304939	16.1653	-	ENSMUSG00000040354	Mars
chr10	62596862	62596965	16.1495	-	ENSMUSG00000020075	Ddx21
chr16	57458282	57458378	16.146	-	ENSMUSG00000022748	Cmss1
chr4	107153890	107153962	16.146	-	ENSMUSG00000028619	Tceanc2
chr2	121996095	121996297	16.137	+	ENSMUSG00000033411	Ctdspl2
chr4	141203526	141203656	16.1267	+	ENSMUSG00000028920	Fbxo42
chr2	73114301	73114406	16.1154	-	ENSMUSG00000027108	Ola1
chr18	61701148	61701222	16.1105	-	ENSMUSG00000024579	Pcyox1l
chr7	5062641	5062764	16.105	+	ENSMUSG00000030435	U2af2
chr4	155622998	155623121	16.1029	+	ENSMUSG00000042202	Slc35e2
chr4	156001347	156001514	16.1029	+	ENSMUSG00000029076	Sdf4
chr6	47491711	47491839	16.0994	+	ENSMUSG00000029686	Cul1
chr11	78039101	78039189	16.0986	+	ENSMUSG00000061981	Flot2
chr15	73756904	73757001	16.0986	+	ENSMUSG00000059895	Ptp4a3
chr10	79546117	79546205	16.075	-	ENSMUSG00000042570	Mier2
chr2	30298426	30298504	16.0718	+	ENSMUSG00000098794	Gm28038
chr2	30298426	30298504	16.0718	+	ENSMUSG00000052533	Nup188
chr2	80319566	80319658	16.0718	+	ENSMUSG00000027006	Dnajc10
chr11	119198777	119198861	16.0704	-	ENSMUSG00000039976	Tbc1d16
chr4	119611521	119611603	16.0589	+	ENSMUSG00000032998	Foxj3
chr9	100787716	100787798	16.0589	+	ENSMUSG00000037286	Stag1
chr6	100277844	100277949	16.0569	-	ENSMUSG00000072872	Rybp
chr3	89344452	89344543	16.046	-	ENSMUSG00000028041	Adam15
chrX	94086883	94086963	16.046	-	ENSMUSG00000079509	Zfx
chr7	80791121	80791195	16.0402	-	ENSMUSG00000030536	Iqgap1
chr2	166907125	166907218	16.0348	+	ENSMUSG00000002718	Cse1l
chr12	44311836	44311953	16.0288	+	ENSMUSG00000036257	Pnpla8
chr4	127225363	127225447	16.0288	+	ENSMUSG00000042388	Dlgap3
chr4	155736043	155736194	16.0288	+	ENSMUSG00000084845	Tmem240
chr1	85834835	85834913	16.0269	+	ENSMUSG00000036707	Cab39
chr9	44915680	44915777	15.9937	-	ENSMUSG00000038717	Atp5l
chr4	137022539	137022610	15.9816	-	ENSMUSG00000060862	Zbtb40
chr8	105601898	105601987	15.9816	-	ENSMUSG00000005705	Agrp
chr6	113399831	113400093	15.9814	+	ENSMUSG00000030276	Ttll3
chr11	102403131	102403253	15.9797	-	ENSMUSG00000018677	Slc25a39
chr5	136482523	136482669	15.9785	-	ENSMUSG00000029705	Cux1
chr8	18883211	18883284	15.9675	+	ENSMUSG00000031467	Agpat5
chr12	110603276	110603362	15.9673	+	ENSMUSG00000018707	Dync1h1
chr12	16986557	16986635	15.966	+	ENSMUSG00000020580	Rock2
chr3	96114664	96114740	15.966	+	ENSMUSG00000038495	Otud7b
chr12	111794753	111794952	15.9604	+	ENSMUSG00000021288	Klc1
chr5	121500529	121500616	15.9504	+	ENSMUSG00000029452	Tmem116
chr8	4353614	4353695	15.9504	+	ENSMUSG00000023235	Ccl25
chr8	114218897	114218983	15.9504	+	ENSMUSG00000046844	Vat1l
chr8	121983247	121983325	15.9504	+	ENSMUSG00000025316	Banp
chr2	160976689	160976827	15.9504	-	ENSMUSG00000057133	Chd6
chr6	125119721	125120051	15.9464	+	ENSMUSG00000063870	Chd4
chr12	36128626	36128810	15.9388	-	ENSMUSG00000020547	Bzw2
chrX	157566428	157566605	15.9388	-	ENSMUSG00000046873	Mbtps2
chrX	157566428	157566605	15.9388	-	ENSMUSG00000091736	Yy2
chr11	55002564	55002655	15.9349	-	ENSMUSG00000018340	Anxa6
chr9	45937921	45937992	15.9339	-	ENSMUSG00000034908	Sidt2
chr8	35629965	35630061	15.9265	+	ENSMUSG00000070056	Mfhas1
chr13	92648806	92648932	15.922	+	ENSMUSG00000021703	Serinc5
chr2	110092571	110092644	15.922	+	ENSMUSG00000027160	Ccdc34
chr1	155368166	155368244	15.9052	-	ENSMUSG00000026469	Xpr1
chr8	94390837	94390926	15.8963	+	ENSMUSG00000031770	Herpud1
chr3	67046516	67046609	15.894	+	ENSMUSG00000034544	Rsrc1
chr7	123410813	123410911	15.894	+	ENSMUSG00000030763	Lcmt1
chr13	95792684	95792797	15.8855	-	ENSMUSG00000021676	Iqgap2
chr11	103118080	103118160	15.8745	+	ENSMUSG00000048878	Hexim1
chr12	65055371	65055470	15.8745	+	ENSMUSG00000035597	Prpf39
chr14	78883718	78883810	15.8745	+	ENSMUSG00000058997	Vwa8
chr15	89368414	89368580	15.8745	+	ENSMUSG00000008690	Ncaph2
chr17	65808799	65808896	15.8745	+	ENSMUSG00000061950	Ppp4r1
chr4	59202537	59202629	15.8745	+	ENSMUSG00000028381	Ugcg
chrX	42188208	42188288	15.8745	+	ENSMUSG00000025862	Stag2
chr12	3299465	3299620	15.8732	-	ENSMUSG00000020671	Rab10
chr10	81240764	81240859	15.8618	+	ENSMUSG00000034949	Zfr2
chr2	132306335	132306461	15.8618	+	ENSMUSG00000058793	Cds2
chrX	151934753	151934877	15.8618	+	ENSMUSG00000025261	Huwe1
chr11	3230260	3230346	15.8513	+	ENSMUSG00000020454	Eif4enif1
chr9	62094986	62095115	15.851	-	ENSMUSG00000032252	Glce
chr11	52238656	52238759	15.8412	+	ENSMUSG00000036309	Skp1a
chr10	80055333	80055425	15.8402	+	ENSMUSG00000075706	Gpx4
chr5	37249450	37249539	15.8402	+	ENSMUSG00000029121	Crmp1
chr8	13106967	13107116	15.8402	+	ENSMUSG00000031446	Cul4a
chrX	152365698	152365805	15.8395	-	ENSMUSG00000056679	Gpr173
chr10	44325122	44325206	15.8182	+	ENSMUSG00000038160	Atg5
chr4	13782305	13782387	15.8182	+	ENSMUSG00000006586	Runx1t1
chr5	117567799	117567911	15.8182	+	ENSMUSG00000061578	Ksr2
chr16	30335986	30336073	15.8182	-	ENSMUSG00000022533	Atp13a3
chr10	128491752	128491881	15.8168	-	ENSMUSG00000090841	Myl6
chr17	80598824	80599075	15.8106	-	ENSMUSG00000024242	Map4k3
chr2	29707643	29707724	15.8062	+	ENSMUSG00000039844	Rapgef1
chr8	11502779	11502920	15.7999	+	ENSMUSG00000031505	Carkd
chr8	123492339	123492436	15.7999	+	ENSMUSG00000031967	Afg3l1
chr5	77348274	77348371	15.7968	+	ENSMUSG00000029250	Polr2b
chr9	40803991	40804068	15.7943	+	ENSMUSG00000015656	Hspa8
chr2	5839204	5839370	15.7936	-	ENSMUSG00000039128	Cdc123
chr8	107153425	107153519	15.7903	+	ENSMUSG00000031924	Cyb5b
chr8	123391168	123391363	15.7903	+	ENSMUSG00000001472	Tcf25
chr15	25390665	25390860	15.7478	-	ENSMUSG00000045763	Basp1
chr13	111486233	111486324	15.7461	-	ENSMUSG00000032745	Gpbp1
chr15	84085258	84085335	15.7461	-	ENSMUSG00000018865	Sult4a1
chr8	104419098	104419426	15.7374	-	ENSMUSG00000035770	Dync1li2
chr11	6393737	6393938	15.7357	+	ENSMUSG00000041164	Zmiz2
chr13	41621685	41621799	15.7357	+	ENSMUSG00000087370	Tmem170b
chr1	74251279	74251426	15.7307	+	ENSMUSG00000006304	Arpc2
chr6	52618828	52618907	15.7287	-	ENSMUSG00000029776	Hibadh
chr2	32772348	32772430	15.7272	-	ENSMUSG00000039021	Ttc16
chr13	29435601	29435681	15.7261	-	ENSMUSG00000006191	Cdkal1
chr9	44723226	44723295	15.7261	-	ENSMUSG00000048537	Phldb1
chr7	82181557	82181677	15.7244	+	ENSMUSG00000030638	Sh3gl3
chr7	144335034	144335257	15.7244	+	ENSMUSG00000037541	Shank2
chr12	80795274	80795355	15.7181	+	ENSMUSG00000021133	Susd6
chr19	11944167	11944254	15.7181	+	ENSMUSG00000046139	Patl1
chr19	46064450	46064540	15.7181	+	ENSMUSG00000055491	Pprc1
chr4	119242265	119242337	15.7165	+	ENSMUSG00000028641	P3h1
chr5	150352539	150352629	15.7165	+	ENSMUSG00000056602	Fry
chr11	75509320	75509417	15.7161	+	ENSMUSG00000020850	Prpf8
chr17	26967068	26967164	15.7152	+	ENSMUSG00000067629	Syngap1
chr5	24489113	24489213	15.7152	+	ENSMUSG00000023353	Agap3
chr7	6074343	6074513	15.7152	+	ENSMUSG00000034690	Nlrp4c
chr9	118532029	118532104	15.7152	+	ENSMUSG00000038708	Golga4
chr15	4071260	4071344	15.7146	+	ENSMUSG00000022186	Oxct1
chr4	41211516	41211601	15.7008	-	ENSMUSG00000028433	Ubap2
chr6	94687357	94687445	15.7008	-	ENSMUSG00000030029	Lrig1
chr8	27275496	27275664	15.6897	+	ENSMUSG00000031490	Eif4ebp1
chr1	87346505	87346587	15.6815	+	ENSMUSG00000048000	Gigyf2
chr12	59073557	59073669	15.6519	+	ENSMUSG00000020994	Pnn
chr15	88810856	88810974	15.6443	-	ENSMUSG00000035845	Alg12
chr2	181549489	181549656	15.6391	+	ENSMUSG00000000826	Dnajc5
chr15	75928121	75928289	15.6233	-	ENSMUSG00000022570	Tsta3
chr7	29038640	29038798	15.6233	-	ENSMUSG00000030592	Ryr1
chr8	125454898	125454982	15.6233	-	ENSMUSG00000001995	Sipa1l2
chr19	23217811	23217977	15.6152	-	ENSMUSG00000024943	Smc5
chr3	80703126	80703246	15.6152	-	ENSMUSG00000033981	Gria2
chr4	41687544	41687626	15.6152	-	ENSMUSG00000028444	Cntfr
chr6	37919087	37919159	15.6125	+	ENSMUSG00000029833	Trim24
chr6	55039131	55039234	15.6125	+	ENSMUSG00000029777	Gars
chr8	25523371	25523537	15.6125	+	ENSMUSG00000031565	Fgfr1
chr11	60555796	60555878	15.6086	+	ENSMUSG00000042650	Alkbh5
chr11	77695545	77695626	15.6046	+	ENSMUSG00000037857	Nufip2
chr10	52425604	52425774	15.6029	+	ENSMUSG00000023068	Nus1
chr11	20718859	20718962	15.6006	-	ENSMUSG00000049659	Aftph
chr12	111341099	111341185	15.6006	-	ENSMUSG00000021279	Cdc42bpb
chr15	103231712	103231790	15.6006	-	ENSMUSG00000009575	Cbx5
chr19	53016996	53017103	15.6006	-	ENSMUSG00000025027	Xpnpep1
chr3	98322872	98322948	15.6006	-	ENSMUSG00000053398	Phgdh
chr9	56157106	56157175	15.6006	-	ENSMUSG00000032324	Tspan3
chr12	40428748	40428857	15.5905	-	ENSMUSG00000055917	Zfp277
chr3	95453671	95453747	15.5899	+	ENSMUSG00000015522	Arnt
chr15	76454753	76454890	15.5742	-	ENSMUSG00000022557	Bop1
chr15	84431665	84431762	15.5742	-	ENSMUSG00000062760	1810041L15Rik
chr17	46260295	46260386	15.5742	-	ENSMUSG00000012296	Tjap1
chr8	85718579	85718696	15.5742	-	ENSMUSG00000031703	Itfg1
chr5	33248198	33248373	15.5701	-	ENSMUSG00000037373	Ctbp1
chr8	25829409	25829550	15.5701	-	ENSMUSG00000031575	Ash2l
chr11	32600969	32601071	15.5631	+	ENSMUSG00000020272	Stk10
chr12	80184056	80184139	15.5603	-	ENSMUSG00000015143	Actn1
chr5	22507479	22507550	15.5603	-	ENSMUSG00000029012	Orc5
chr8	69745702	69745799	15.5532	-	ENSMUSG00000092260	Zfp963
chr5	108619876	108619961	15.5519	-	ENSMUSG00000062234	Gak
chr2	91617220	91617306	15.5492	+	ENSMUSG00000040549	Ckap5
chr5	111331558	111331649	15.5492	+	ENSMUSG00000050017	Pitpnb
chr12	55294826	55294899	15.5244	-	ENSMUSG00000021022	Ppp2r3c
chr16	17097558	17097654	15.5244	-	ENSMUSG00000022771	Ppil2
chr19	12781426	12781544	15.5195	-	ENSMUSG00000024695	Zfp91
chr10	7621524	7621597	15.514	+	ENSMUSG00000019796	Lrp11
chr9	19644965	19645119	15.514	+	ENSMUSG00000057551	Zfp317
chr16	91503259	91503335	15.5131	+	ENSMUSG00000022967	Ifnar1
chr11	53263091	53263173	15.5123	-	ENSMUSG00000020361	Hspa4
chr9	57447234	57447466	15.5123	-	ENSMUSG00000040722	Scamp5
chr2	28535042	28535133	15.508	+	ENSMUSG00000026821	Ralgds
chrX	161234113	161234194	15.508	+	ENSMUSG00000000037	Scml2
chr10	119222357	119222521	15.5033	-	ENSMUSG00000020114	Cand1
chr6	32965761	32965855	15.5033	-	ENSMUSG00000053768	Chchd3
chr2	157985532	157985638	15.4809	-	ENSMUSG00000027650	Tti1
chr7	28953997	28954081	15.4809	-	ENSMUSG00000054808	Actn4
chr15	99448158	99448333	15.4716	-	ENSMUSG00000023009	Nckap5l
chr8	22633194	22633290	15.4716	-	ENSMUSG00000031536	Polb
chr12	103437155	103437312	15.4693	+	ENSMUSG00000064215	Ifi27
chr13	23555808	23555891	15.4693	+	ENSMUSG00000052565	Hist1h1d
chr4	62611824	62611944	15.4693	+	ENSMUSG00000059810	Rgs3
chr5	117231410	117231537	15.4658	+	ENSMUSG00000061288	Taok3
chr15	26333354	26333460	15.4631	+	ENSMUSG00000022269	2016-03-11
chr10	78345115	78345335	15.4612	-	ENSMUSG00000001211	Agpat3
chr1	84766292	84766424	15.448	-	ENSMUSG00000026219	Trip12
chr15	84309761	84309878	15.4363	+	ENSMUSG00000022438	Parvb
chr7	44819391	44819482	15.4363	+	ENSMUSG00000074141	Il4i1
chr10	80280430	80280526	15.434	+	ENSMUSG00000069565	Dazap1
chr9	109023838	109023932	15.4339	+	ENSMUSG00000025648	Pfkfb4
chr13	97988598	97988676	15.4263	-	ENSMUSG00000021662	Arhgef28
chr7	80370056	80370349	15.4263	-	ENSMUSG00000038886	Man2a2
chr6	90673550	90673623	15.4256	-	ENSMUSG00000034312	Iqsec1
chr15	8185889	8186026	15.4176	+	ENSMUSG00000039801	2410089E03Rik
chr2	10381804	10381934	15.4176	+	ENSMUSG00000061186	Sfmbt2
chr3	157995707	157995777	15.4176	+	ENSMUSG00000039988	Ankrd13c
chr10	4076029	4076122	15.4132	+	ENSMUSG00000040675	Mthfd1l
chr5	139153844	139153921	15.4132	+	ENSMUSG00000025857	Dnaaf5
chr8	107032551	107032641	15.4132	+	ENSMUSG00000031913	Vps4a
chr2	70815307	70815379	15.4024	-	ENSMUSG00000041997	Tlk1
chr1	86355188	86355268	15.3951	-	ENSMUSG00000026234	Ncl
chr10	31547104	31547251	15.3947	-	ENSMUSG00000063760	Rnf217
chr11	69918504	69918682	15.3947	-	ENSMUSG00000078812	Eif5a
chr12	80641105	80641192	15.3947	-	ENSMUSG00000021131	Erh
chr13	58383168	58383246	15.3947	-	ENSMUSG00000021550	2210016F16Rik
chr10	76034331	76034430	15.3827	+	ENSMUSG00000049764	Zfp280b
chr5	120484764	120484950	15.3774	-	ENSMUSG00000029598	Plbd2
chrX	73810013	73810101	15.3774	-	ENSMUSG00000002006	Pdzd4
chr2	152323960	152324036	15.3682	-	ENSMUSG00000027466	Rbck1
chr8	13880302	13880473	15.3652	+	ENSMUSG00000047710	Champ1
chr14	19416961	19417065	15.3559	-	ENSMUSG00000095280	Gm21738
chr17	80061028	80061133	15.3431	-	ENSMUSG00000024095	Hnrnpll
chr15	38059438	38059570	15.3318	-	ENSMUSG00000037487	Ubr5
chr9	122169069	122169280	15.3312	+	ENSMUSG00000038145	Snrk
chr11	57483477	57483563	15.3305	-	ENSMUSG00000020523	Fam114a2
chr3	19249503	19249582	15.3305	-	ENSMUSG00000069094	Pde7a
chr3	41772347	41772421	15.3304	+	ENSMUSG00000025766	D3Ertd751e
chr4	139195358	139195436	15.3173	+	ENSMUSG00000028745	Capzb
chr11	88841302	88841483	15.3146	-	ENSMUSG00000018428	Akap1
chr18	36677996	36678093	15.3146	-	ENSMUSG00000006050	Sra1
chr1	176741271	176741398	15.3095	-	ENSMUSG00000057335	Cep170
chr10	94002609	94002719	15.3095	-	ENSMUSG00000036099	Vezt
chr12	53085478	53085549	15.3017	+	ENSMUSG00000061603	Akap6
chr12	76450805	76450877	15.2977	+	ENSMUSG00000073000	Gm10451
chr18	6788948	6789034	15.2977	+	ENSMUSG00000073639	Rab18
chr9	63615238	63615382	15.2977	+	ENSMUSG00000037257	Aagab
chr13	108078793	108078878	15.2813	-	ENSMUSG00000068184	Ndufaf2
chr5	113254722	113254809	15.2813	-	ENSMUSG00000042216	Sgsm1
chr1	180069797	180069869	15.2689	+	ENSMUSG00000026490	Cdc42bpa
chr14	76498557	76498638	15.2689	+	ENSMUSG00000022010	Tsc22d1
chr19	29587870	29587953	15.2689	+	ENSMUSG00000038658	Ric1
chr5	123415028	123415103	15.2689	+	ENSMUSG00000038342	Mlxip
chr5	149414968	149415097	15.2689	+	ENSMUSG00000029659	Medag
chr5	134623163	134623239	15.2612	-	ENSMUSG00000040731	Eif4h
chr7	105808945	105809054	15.2483	-	ENSMUSG00000030879	Mrpl17
chr9	65034002	65034105	15.2457	+	ENSMUSG00000032393	Dpp8
chr1	151967243	151967324	15.2407	-	ENSMUSG00000032666	1700025G04Rik
chr9	41072111	41072189	15.238	-	ENSMUSG00000032020	Ubash3b
chr15	76248490	76248617	15.2377	+	ENSMUSG00000022564	Grina
chr1	36795953	36796036	15.2368	-	ENSMUSG00000026116	Tmem131
chr13	53333379	53333519	15.2368	-	ENSMUSG00000021468	Sptlc1
chr17	50894878	50894949	15.2368	-	ENSMUSG00000023923	Tbc1d5
chr2	26072234	26072376	15.2368	-	ENSMUSG00000026932	Nacc2
chr10	83590377	83590490	15.2368	+	ENSMUSG00000034560	A230046K03Rik
chr13	18827689	18827766	15.2368	+	ENSMUSG00000041236	Vps41
chr3	32557186	32557260	15.2368	+	ENSMUSG00000027668	Mfn1
chr16	18354533	18354636	15.2364	+	ENSMUSG00000000325	Arvcf
chr17	28330460	28330533	15.2364	+	ENSMUSG00000037805	Rpl10a
chr6	3560451	3560611	15.2364	+	ENSMUSG00000001376	Ccdc132
chr10	70129315	70129555	15.229	+	ENSMUSG00000048701	Ccdc6
chr5	22852519	22852617	15.2262	+	ENSMUSG00000106379	Lhfpl3
chr11	106037313	106037406	15.2249	+	ENSMUSG00000049354	Dcaf7
chr9	59633440	59633521	15.2249	+	ENSMUSG00000025237	Parp6
chr8	71341862	71342007	15.2245	+	ENSMUSG00000004677	Myo9b
chr2	31048178	31048332	15.2204	-	ENSMUSG00000075415	Fnbp1
chr2	61631773	61631902	15.2154	+	ENSMUSG00000064289	Tank
chr3	94489715	94489791	15.2154	+	ENSMUSG00000028137	Celf3
chr4	139112553	139112657	15.2072	-	ENSMUSG00000050608	Minos1
chr18	67807411	67807479	15.188	+	ENSMUSG00000024542	Cep192
chr10	117100493	117100578	15.1856	-	ENSMUSG00000020170	Frs2
chr7	137276613	137276748	15.1856	-	ENSMUSG00000010476	Ebf3
chr10	9666832	9666906	15.1739	-	ENSMUSG00000060487	Samd5
chr12	104732253	104732333	15.1731	-	ENSMUSG00000041415	Dicer1
chr11	64009331	64009411	15.1626	-	ENSMUSG00000042148	Cox10
chr11	53541999	53542073	15.1595	+	ENSMUSG00000018398	2016-09-08
chr16	33403520	33403600	15.1595	+	ENSMUSG00000022811	Zfp148
chr9	64175395	64175520	15.1595	+	ENSMUSG00000032399	Rpl4
chr6	38561939	38562064	15.1546	+	ENSMUSG00000029823	Luc7l2
chr11	60198566	60198710	15.1438	+	ENSMUSG00000062115	Rai1
chr12	69199715	69199897	15.1438	+	ENSMUSG00000097061	9330151L19Rik
chr3	89739276	89739357	15.1438	+	ENSMUSG00000027951	Adar
chr12	101922642	101922753	15.1437	-	ENSMUSG00000021189	Atxn3
chr17	17605354	17605463	15.1437	-	ENSMUSG00000023845	Lnpep
chr4	95049616	95049837	15.1437	-	ENSMUSG00000052684	Jun
chr9	35150406	35150485	15.1424	-	ENSMUSG00000032040	Dcps
chr9	50991685	50991782	15.1424	-	ENSMUSG00000037112	Sik2
chr19	8766295	8766381	15.142	+	ENSMUSG00000010097	Nxf1
chr11	78535737	78535860	15.1379	-	ENSMUSG00000017615	Tnfaip1
chr3	127169646	127169721	15.1379	-	ENSMUSG00000032826	Ank2
chr12	102480353	102480573	15.1304	+	ENSMUSG00000021192	Golga5
chr4	21860703	21860786	15.1304	+	ENSMUSG00000028248	Pnisr
chr7	97878866	97878950	15.1304	+	ENSMUSG00000030774	Pak1
chr1	127307624	127307692	15.1292	+	ENSMUSG00000036155	Mgat5
chr5	33027785	33027858	15.1292	+	ENSMUSG00000018965	Ywhah
chr8	72151524	72151605	15.1292	+	ENSMUSG00000031799	Tpm4
chr1	106224283	106224358	15.1251	+	ENSMUSG00000044340	Phlpp1
chr5	115455177	115455284	15.1251	+	ENSMUSG00000054256	Msi1
chrX	101280450	101280531	15.1251	+	ENSMUSG00000079487	Med12
chr11	108331578	108331697	15.107	-	ENSMUSG00000050965	Prkca
chr9	78479339	78479416	15.1034	-	ENSMUSG00000037742	Eef1a1
chr8	85057460	85057564	15.0942	+	ENSMUSG00000031691	Tnpo2
chr6	115275069	115275216	15.0907	+	ENSMUSG00000009394	Syn2
chrX	101653769	101653907	15.0762	+	ENSMUSG00000034160	Ogt
chr13	92324258	92324360	15.0746	-	ENSMUSG00000014850	Msh3
chr1	60331837	60331944	15.0659	+	ENSMUSG00000073664	Nbeal1
chr3	40771029	40771156	15.0659	+	ENSMUSG00000025757	Hspa4l
chr4	103146290	103146385	15.0659	+	ENSMUSG00000028522	Mier1
chr5	142454250	142454334	15.0659	+	ENSMUSG00000056493	Foxk1
chr2	117262164	117262239	15.0611	+	ENSMUSG00000027349	Fam98b
chr13	46680649	46680811	15.0603	-	ENSMUSG00000021374	Nup153
chr1	153484656	153484915	15.0511	-	ENSMUSG00000042699	Dhx9
chr10	77915219	77915305	15.0511	-	ENSMUSG00000009292	Trpm2
chr14	23448349	23448426	15.0511	-	ENSMUSG00000063142	Kcnma1
chr6	120939139	120939254	15.0511	-	ENSMUSG00000051586	Mical3
chr17	71632515	71632614	15.0411	+	ENSMUSG00000041057	Wdr43
chr4	98991487	98991675	15.04	-	ENSMUSG00000028556	Dock7
chr11	88082852	88082945	15.0378	+	ENSMUSG00000018377	Vezf1
chr13	12409261	12409332	15.0378	+	ENSMUSG00000050244	Heatr1
chrX	20670353	20670456	15.0378	+	ENSMUSG00000001924	Uba1
chr4	82476826	82476914	15.0291	-	ENSMUSG00000008575	Nfib
chr11	52384963	52385043	15.0264	+	ENSMUSG00000020402	Vdac1
chr5	130242270	130242347	15.0264	+	ENSMUSG00000053094	Tmem248
chr11	78183060	78183137	15.0252	-	ENSMUSG00000058546	Rpl23a
chr2	120929110	120929188	15.0252	-	ENSMUSG00000027272	Ubr1
chr7	123319443	123319525	15.0252	-	ENSMUSG00000030766	Arhgap17
chr4	130781225	130781456	15.021	+	ENSMUSG00000028580	Pum1
chr7	111080701	111080809	15.0204	-	ENSMUSG00000005610	Eif4g2
chr1	136319074	136319166	15.0158	-	ENSMUSG00000041570	Camsap2
chr4	3831668	3831786	15.0158	-	ENSMUSG00000028234	Rps20
chr6	39550524	39550624	15.0158	-	ENSMUSG00000038456	Dennd2a
chr15	80214181	80214281	15.0118	+	ENSMUSG00000042428	Mgat3
chr18	62999005	62999133	15.0118	+	ENSMUSG00000024581	Napg
chr4	116987631	116987706	15.0118	+	ENSMUSG00000033948	Zswim5
chr7	97507998	97508084	15.0118	+	ENSMUSG00000025133	Ints4
chr12	33434802	33434908	15.0026	+	ENSMUSG00000020561	Twistnb
chr11	120380850	120380940	15.0015	-	ENSMUSG00000039703	Nploc4
chr18	9995783	9995866	15.0015	-	ENSMUSG00000047879	Usp14
chr3	5573872	5573950	15.0015	-	ENSMUSG00000040374	Pex2
chr3	88754841	88754929	15.0015	-	ENSMUSG00000068923	Syt11
chr1	177038812	177038897	14.9882	-	ENSMUSG00000019699	Akt3
chr17	66505985	66506066	14.9882	-	ENSMUSG00000023460	Rab12
chr17	86260800	86260871	14.9871	+	ENSMUSG00000045038	Prkce
chr12	41485474	41485594	14.9729	-	ENSMUSG00000036295	Lrrn3
chr9	55862589	55862693	14.9729	-	ENSMUSG00000034007	Scaper
chrX	94536990	94537106	14.9729	-	ENSMUSG00000025151	Maged1
chr13	67101512	67101580	14.9654	-	ENSMUSG00000100235	Gm28557
chr13	67101512	67101580	14.9654	-	ENSMUSG00000074824	Rslcan18
chr10	82874735	82874817	14.9643	+	ENSMUSG00000020250	Txnrd1
chr17	51782586	51782666	14.9602	-	ENSMUSG00000023927	Satb1
chr3	86793127	86793236	14.9602	-	ENSMUSG00000028078	Dclk2
chr9	70501533	70501618	14.9602	-	ENSMUSG00000032217	Rnf111
chr14	120486341	120486426	14.9524	+	ENSMUSG00000051615	Rap2a
chr9	15545228	15545306	14.9524	+	ENSMUSG00000058173	Smco4
chr11	106181019	106181212	14.9499	-	ENSMUSG00000069631	Strada
chr12	51358684	51358773	14.9464	+	ENSMUSG00000035293	G2e3
chr4	49652709	49652795	14.9464	+	ENSMUSG00000028309	Rnf20
chr8	107449800	107449894	14.9464	+	ENSMUSG00000031930	Wwp2
chr15	99712497	99712581	14.9362	+	ENSMUSG00000023018	Smarcd1
chr11	100517839	100517923	14.9292	-	ENSMUSG00000020917	Acly
chr6	7681162	7681257	14.9292	-	ENSMUSG00000029752	Asns
chr15	77918466	77918559	14.9252	-	ENSMUSG00000005354	Txn2
chr6	87980739	87980824	14.9114	-	ENSMUSG00000044927	H1fx
chr15	92486598	92486688	14.9113	+	ENSMUSG00000036218	Pdzrn4
chr3	89640071	89640155	14.9113	+	ENSMUSG00000000794	Kcnn3
chr9	113956062	113956225	14.9113	+	ENSMUSG00000009741	Ubp1
chr14	121244624	121244708	14.9022	+	ENSMUSG00000025555	Farp1
chr5	9479513	9479621	14.9022	+	ENSMUSG00000056004	9330182L06Rik
chr13	93466248	93466337	14.8999	-	ENSMUSG00000021690	Jmy
chr17	65608545	65608629	14.8976	-	ENSMUSG00000024091	Vapa
chr3	92024934	92025004	14.8973	+	ENSMUSG00000042244	Pglyrp3
chr9	92338096	92338166	14.8973	+	ENSMUSG00000074139	1700057G04Rik
chr10	76491619	76491716	14.895	+	ENSMUSG00000001150	Mcm3ap
chr19	46198509	46198642	14.895	+	ENSMUSG00000025224	Gbf1
chr2	119354175	119354323	14.895	+	ENSMUSG00000027313	Chac1
chr9	110187946	110188027	14.886	+	ENSMUSG00000032481	Smarcc1
chr3	51558749	51558893	14.8703	-	ENSMUSG00000037111	Setd7
chr3	139027112	139027191	14.8703	-	ENSMUSG00000028149	Rap1gds1
chr19	38811956	38812025	14.8697	-	ENSMUSG00000024999	Noc3l
chr2	35873744	35873832	14.8697	-	ENSMUSG00000026885	Ttll11
chr11	98934327	98934410	14.8568	+	ENSMUSG00000037992	Rara
chr1	58828312	58828386	14.8562	+	ENSMUSG00000026029	Casp8
chr2	122152840	122152942	14.8562	+	ENSMUSG00000060802	B2m
chr1	34813413	34813516	14.8538	-	ENSMUSG00000037503	Fam168b
chr13	28950125	28950271	14.8538	-	ENSMUSG00000076431	Sox4
chr12	44206070	44206156	14.8508	-	ENSMUSG00000014905	Dnajb9
chr9	119251055	119251165	14.8503	-	ENSMUSG00000070280	Slc22a14
chr9	119251055	119251165	14.8503	-	ENSMUSG00000036737	Oxsr1
chr17	27604145	27604263	14.8447	-	ENSMUSG00000024213	Nudt3
chr10	42530711	42530812	14.8402	+	ENSMUSG00000019804	Snx3
chr11	23270980	23271088	14.8359	+	ENSMUSG00000020290	Xpo1
chr3	34026524	34026617	14.8316	+	ENSMUSG00000027680	Fxr1
chr1	89652196	89652287	14.8304	+	ENSMUSG00000055013	Agap1
chr10	57516763	57516960	14.8197	-	ENSMUSG00000019877	Serinc1
chr10	116511229	116511348	14.8167	-	ENSMUSG00000020166	Cnot2
chr15	97792769	97792865	14.8167	-	ENSMUSG00000022475	Hdac7
chr17	25831397	25831570	14.8167	-	ENSMUSG00000039615	Stub1
chr4	147864812	147864917	14.8167	-	ENSMUSG00000029022	Miip
chr6	29493009	29493094	14.8167	-	ENSMUSG00000059022	Kcp
chr7	110976160	110976247	14.8104	-	ENSMUSG00000005611	Mrvi1
chr1	66258648	66258745	14.8021	+	ENSMUSG00000015222	Map2
chr13	13755278	13755376	14.8021	+	ENSMUSG00000019726	Lyst
chr12	29999645	29999826	14.7952	+	ENSMUSG00000020674	Pxdn
chr12	36595186	36595270	14.7952	+	ENSMUSG00000043153	Ispd
chr13	34055377	34055499	14.7952	+	ENSMUSG00000038286	Bphl
chr15	5201860	5201973	14.7952	+	ENSMUSG00000022151	Ttc33
chr9	110553192	110553276	14.7952	+	ENSMUSG00000044791	Setd2
chr5	100667283	100667368	14.7775	-	ENSMUSG00000029319	Coq2
chr19	38207566	38207693	14.7768	-	ENSMUSG00000054237	Fra10ac1
chr6	8519791	8519868	14.7742	+	ENSMUSG00000029638	Glcci1
chr11	53588580	53588692	14.7686	+	ENSMUSG00000018395	Kif3a
chr1	118465680	118465761	14.7683	+	ENSMUSG00000064302	Clasp1
chr10	45080744	45080827	14.7683	+	ENSMUSG00000019849	Prep
chr10	80157731	80157880	14.7683	+	ENSMUSG00000035621	Midn
chr18	37487790	37487876	14.7683	+	ENSMUSG00000046387	Pcdhb17
chr7	16832398	16832500	14.7658	+	ENSMUSG00000030374	Strn4
chr5	144809984	144810108	14.7627	+	ENSMUSG00000045482	Trrap
chr11	116850762	116850889	14.751	-	ENSMUSG00000034120	Srsf2
chr11	107092079	107092156	14.7479	-	ENSMUSG00000040481	Bptf
chr5	124214624	124214710	14.7435	-	ENSMUSG00000029406	Pitpnm2
chr15	76795392	76795498	14.7401	-	ENSMUSG00000033697	Arhgap39
chr5	29772070	29772150	14.7355	+	ENSMUSG00000029131	Dnajb6
chr12	31810165	31810250	14.7253	+	ENSMUSG00000035933	Cog5
chr2	30247516	30247585	14.7253	+	ENSMUSG00000007476	Lrrc8a
chr2	30247516	30247585	14.7253	+	ENSMUSG00000099041	Gm28035
chr3	28525186	28525263	14.7253	+	ENSMUSG00000027692	Tnik
chr9	45925970	45926067	14.7253	+	ENSMUSG00000035382	Pcsk7
chr8	70461453	70461557	14.7222	-	ENSMUSG00000055707	Klhl26
chrX	13081254	13081335	14.7201	+	ENSMUSG00000031010	Usp9x
chr10	95303416	95303518	14.7169	-	ENSMUSG00000045867	Cradd
chr4	133696200	133696491	14.7169	-	ENSMUSG00000007880	Arid1a
chr8	126440983	126441108	14.7169	-	ENSMUSG00000090290	Gm17296
chr12	25041280	25041361	14.7078	+	ENSMUSG00000036333	Kidins220
chr1	186094883	186095045	14.7049	-	ENSMUSG00000039246	Lyplal1
chr13	17942187	17942277	14.7049	-	ENSMUSG00000008859	Rala
chr17	66023647	66023730	14.7049	-	ENSMUSG00000034647	Ankrd12
chr14	118912013	118912117	14.7027	-	ENSMUSG00000042156	Dzip1
chr11	119497908	119498038	14.7024	+	ENSMUSG00000039850	Endov
chr14	56909709	56909813	14.7024	+	ENSMUSG00000021945	Zmym2
chr19	58988810	58988956	14.7023	-	ENSMUSG00000041362	Shtn1
chr8	95133186	95133308	14.7023	-	ENSMUSG00000031788	Kifc3
chr4	149772155	149772222	14.6969	-	ENSMUSG00000028982	Slc25a33
chr18	46772534	46772617	14.6908	+	ENSMUSG00000024480	Ap3s1
chr19	45520468	45520576	14.6908	+	ENSMUSG00000025217	Btrc
chr6	67267860	67267939	14.6886	+	ENSMUSG00000036371	Serbp1
chr17	3164236	3164410	14.6844	+	ENSMUSG00000046201	Scaf8
chr6	125152369	125152460	14.6832	+	ENSMUSG00000038271	Iffo1
chr5	71464781	71464861	14.6784	-	ENSMUSG00000049387	Cox7b2
chr11	98096298	98096454	14.6771	-	ENSMUSG00000020883	Fbxl20
chr5	140646864	140646962	14.6758	-	ENSMUSG00000036565	Ttyh3
chr5	106675972	106676051	14.6756	-	ENSMUSG00000049606	Zfp644
chr10	83195744	83195819	14.6648	+	ENSMUSG00000034612	Chst11
chr11	20205739	20205827	14.6648	+	ENSMUSG00000020149	Rab1a
chr8	34816197	34816291	14.6647	+	ENSMUSG00000031530	Dusp4
chr2	164395119	164395246	14.6521	-	ENSMUSG00000016995	Matn4
chr11	119036576	119036701	14.6518	-	ENSMUSG00000025578	Cbx8
chr2	180982200	180982388	14.6388	+	ENSMUSG00000027575	Arfgap1
chr13	63148642	63148730	14.6384	+	ENSMUSG00000021458	2010111I01Rik
chr4	138577422	138577553	14.6282	-	ENSMUSG00000028753	Vwa5b1
chrX	150985822	150985943	14.6282	-	ENSMUSG00000025266	Gnl3l
chr10	62477344	62477421	14.6223	-	ENSMUSG00000020078	Vps26a
chr3	69067294	69067395	14.6223	-	ENSMUSG00000027782	Kpna4
chr6	84982583	84982713	14.6223	-	ENSMUSG00000033769	Exoc6b
chr19	7463214	7463439	14.6195	-	ENSMUSG00000024758	Rtn3
chr11	17221259	17221367	14.6156	+	ENSMUSG00000078970	Wdr92
chr2	156721217	156721407	14.6156	+	ENSMUSG00000061689	Dlgap4
chr16	85019330	85019431	14.6101	-	ENSMUSG00000022892	App
chr8	85022550	85022639	14.6101	-	ENSMUSG00000052456	Asna1
chr18	61298236	61298334	14.6096	-	ENSMUSG00000033871	Ppargc1b
chr7	79889220	79889329	14.6096	-	ENSMUSG00000063801	Ap3s2
chr9	114597635	114597770	14.6096	-	ENSMUSG00000056167	Cnot10
chr16	32376858	32376967	14.6094	+	ENSMUSG00000053774	Ubxn7
chr5	92449203	92449286	14.6039	-	ENSMUSG00000029426	Scarb2
chr8	25750428	25750676	14.6039	-	ENSMUSG00000061313	Ddhd2
chr14	65232598	65232672	14.6014	-	ENSMUSG00000007989	Fzd3
chr16	4043709	4043779	14.6014	-	ENSMUSG00000005981	Trap1
chr2	13131581	13131663	14.6014	-	ENSMUSG00000026727	Rsu1
chr4	152416128	152416255	14.6014	-	ENSMUSG00000028931	Kcnab2
chr5	103138728	103138828	14.6014	-	ENSMUSG00000046709	Mapk10
chr11	88146857	88146941	14.5973	+	ENSMUSG00000018378	Cuedc1
chr8	85521157	85521295	14.5973	+	ENSMUSG00000031700	Gpt2
chr14	21609998	21610119	14.5968	+	ENSMUSG00000021767	Kat6b
chr2	31165504	31165659	14.5968	+	ENSMUSG00000000194	Gpr107
chr6	83988131	83988212	14.5917	+	ENSMUSG00000030016	Zfp638
chr10	81398540	81398634	14.5911	-	ENSMUSG00000055053	Nfic
chr11	118261849	118262002	14.5911	-	ENSMUSG00000033909	Usp36
chr5	135038234	135038333	14.5892	+	ENSMUSG00000007207	Stx1a
chr13	43660517	43660655	14.5788	+	ENSMUSG00000044164	Rnf182
chr15	44399603	44399674	14.5684	-	ENSMUSG00000038736	Nudcd1
chr5	66504815	66504924	14.5684	-	ENSMUSG00000029207	Apbb2
chr11	59500980	59501059	14.5567	-	ENSMUSG00000020472	Zkscan17
chr12	99253621	99253731	14.5567	-	ENSMUSG00000033713	Foxn3
chr19	16316194	16316324	14.5558	+	ENSMUSG00000024639	Gnaq
chr8	122900419	122900600	14.5558	-	ENSMUSG00000035569	Ankrd11
chr1	128155188	128155265	14.544	+	ENSMUSG00000056211	R3hdm1
chr10	58374284	58374362	14.544	+	ENSMUSG00000019920	Lims1
chr8	124527248	124527327	14.544	+	ENSMUSG00000031979	Cog2
chr2	32278802	32278904	14.5281	-	ENSMUSG00000044627	Swi5
chr11	70402334	70402451	14.525	-	ENSMUSG00000018921	Pelp1
chr7	4439506	4439579	14.525	-	ENSMUSG00000008435	Rdh13
chr9	111681674	111681830	14.525	-	ENSMUSG00000032502	Stac
chr11	4997834	4997936	14.5165	+	ENSMUSG00000009090	Ap1b1
chr6	91939494	91939564	14.5165	+	ENSMUSG00000034063	4930590J08Rik
chr7	125782872	125782963	14.5165	+	ENSMUSG00000032743	D430042O09Rik
chr1	58398821	58398912	14.5135	+	ENSMUSG00000051223	Bzw1
chr11	85506789	85506867	14.5135	+	ENSMUSG00000059439	Bcas3
chr2	59250180	59250255	14.5135	+	ENSMUSG00000026991	Pkp4
chr7	128638425	128638516	14.5135	+	ENSMUSG00000042105	Inpp5f
chr1	52163810	52163935	14.5077	-	ENSMUSG00000026103	Gls
chr5	74327390	74327487	14.4992	-	ENSMUSG00000062110	Scfd2
chr4	155510974	155511119	14.493	+	ENSMUSG00000029064	Gnb1
chr1	118971293	118971399	14.492	-	ENSMUSG00000048402	Gli2
chr4	118002652	118002725	14.492	-	ENSMUSG00000028538	St3gal3
chr4	135968263	135968349	14.492	-	ENSMUSG00000028670	Lypla2
chr11	106784731	106784831	14.4911	-	ENSMUSG00000020719	Ddx5
chr1	138973109	138973192	14.4878	+	ENSMUSG00000056268	Dennd1b
chr13	42890019	42890088	14.4878	+	ENSMUSG00000054728	Phactr1
chr15	76171969	76172057	14.4859	-	ENSMUSG00000022565	Plec
chr17	33743827	33743905	14.4859	-	ENSMUSG00000077450	Rab11b
chr12	113056178	113056257	14.4808	+	ENSMUSG00000021143	Pacs2
chr15	75973276	75973399	14.4808	+	ENSMUSG00000034429	Zfp707
chr17	56722079	56722152	14.4808	+	ENSMUSG00000002379	Ndufa11
chr9	92592284	92592428	14.4796	+	ENSMUSG00000032374	Plod2
chr1	66696766	66696890	14.4748	+	ENSMUSG00000055567	Unc80
chr1	87216983	87217062	14.4748	+	ENSMUSG00000026254	Eif4e2
chr18	21020258	21020336	14.4748	+	ENSMUSG00000024317	Rnf138
chr2	118786516	118786600	14.4748	+	ENSMUSG00000040035	Disp2
chr8	4624785	4624883	14.4748	+	ENSMUSG00000058748	Zfp958
chr9	108048674	108048767	14.4748	+	ENSMUSG00000032594	Ip6k1
chr11	99223805	99223904	14.4635	-	ENSMUSG00000037935	Smarce1
chr5	125323845	125323946	14.461	-	ENSMUSG00000037936	Scarb1
chr9	96333452	96333534	14.461	-	ENSMUSG00000032412	Atp1b3
chr13	49210718	49210804	14.461	-	ENSMUSG00000037960	1110007C09Rik
chr9	56205074	56205203	14.461	-	ENSMUSG00000074305	Peak1
chr10	127486300	127486392	14.4567	+	ENSMUSG00000025404	R3hdm2
chrY	90805787	90805860	14.4567	+	ENSMUSG00000096768	Erdr1
chr1	82885627	82885720	14.452	+	ENSMUSG00000026159	Agfg1
chr5	23452490	23452562	14.4508	+	ENSMUSG00000029004	Kmt2e
chr5	109938865	109939021	14.4507	+	ENSMUSG00000090015	Gm15446
chr18	73667086	73667155	14.4414	-	ENSMUSG00000024515	Smad4
chr3	9473892	9473977	14.4414	-	ENSMUSG00000040209	Zfp704
chr4	42989020	42989106	14.4414	-	ENSMUSG00000028452	Vcp
chr7	109955840	109955965	14.4414	-	ENSMUSG00000035901	Dennd5a
chr9	57759725	57759837	14.4414	-	ENSMUSG00000032316	Clk3
chr5	31174490	31174581	14.436	-	ENSMUSG00000101678	Gm29609
chr5	31174490	31174581	14.436	-	ENSMUSG00000106864	Gtf3c2
chr9	3431668	3431799	14.4317	+	ENSMUSG00000025898	Cwf19l2
chrX	47921161	47921270	14.4317	+	ENSMUSG00000001173	Ocrl
chr16	36057802	36057877	14.4195	-	ENSMUSG00000003955	Fam162a
chr9	62800268	62800428	14.4195	-	ENSMUSG00000032244	Fem1b
chr11	31363255	31363360	14.4146	-	ENSMUSG00000020303	Stc2
chr11	71007810	71007985	14.4146	-	ENSMUSG00000018442	Derl2
chr3	152207145	152207253	14.4146	-	ENSMUSG00000028035	Dnajb4
chr4	134367415	134367496	14.4146	-	ENSMUSG00000028838	Extl1
chr11	31917424	31917536	14.4094	+	ENSMUSG00000020300	Cpeb4
chr11	69675377	69675460	14.4073	-	ENSMUSG00000005204	Senp3
chr2	5667361	5667573	14.4073	-	ENSMUSG00000039145	Camk1d
chr1	192951371	192951442	14.4063	-	ENSMUSG00000016200	Syt14
chr11	101049541	101049689	14.4031	+	ENSMUSG00000019302	Atp6v0a1
chr18	61588080	61588224	14.4031	+	ENSMUSG00000024576	Csnk1a1
chr14	26436765	26436863	14.3997	-	ENSMUSG00000021870	Slmap
chr14	27497282	27497354	14.3997	-	ENSMUSG00000046753	Ccdc66
chr8	84933769	84933891	14.3997	-	ENSMUSG00000053693	Mast1
chr13	91696539	91696654	14.3974	+	ENSMUSG00000003992	Ssbp2
chr2	32215895	32215974	14.3974	+	ENSMUSG00000039262	Prrc2b
chr6	125049179	125049287	14.3898	+	ENSMUSG00000030330	Ing4
chr9	70543744	70543837	14.3898	+	ENSMUSG00000032212	Sltm
chrX	20698828	20698926	14.3898	+	ENSMUSG00000031065	Cdk16
chr13	29935765	29935846	14.3651	-	ENSMUSG00000016477	E2f3
chr1	165422792	165422876	14.3625	-	ENSMUSG00000026571	Dcaf6
chr10	79980374	79980504	14.3625	-	ENSMUSG00000013858	Tmem259
chr5	92284032	92284122	14.3625	-	ENSMUSG00000029415	Sdad1
chr5	140138019	140138129	14.3625	-	ENSMUSG00000029554	Mad1l1
chr14	103154800	103154899	14.3589	-	ENSMUSG00000033004	Mycbp2
chr19	45032209	45032300	14.3589	-	ENSMUSG00000074818	Pdzd7
chr5	136243427	136243504	14.3589	-	ENSMUSG00000005057	Sh2b2
chr8	111191490	111191573	14.3589	-	ENSMUSG00000003316	Glg1
chrX	162790026	162790095	14.3589	-	ENSMUSG00000038344	Txlng
chr16	36877941	36878034	14.355	+	ENSMUSG00000034243	Golgb1
chr9	64987015	64987213	14.3548	-	ENSMUSG00000033629	Hacd3
chr13	60664133	60664212	14.3522	+	ENSMUSG00000021559	Dapk1
chr5	121287153	121287249	14.3522	+	ENSMUSG00000042744	Gm15800
chr9	49011507	49011586	14.3522	+	ENSMUSG00000032267	Usp28
chr9	57741622	57741741	14.3522	+	ENSMUSG00000038957	Edc3
chr16	4875055	4875148	14.3461	-	ENSMUSG00000039568	Ubald1
chr2	180668302	180668371	14.3456	-	ENSMUSG00000038914	Dido1
chr7	125652533	125652637	14.3456	-	ENSMUSG00000032777	Gtf3c1
chr13	90105068	90105281	14.3443	+	ENSMUSG00000012422	Tmem167
chr2	14104200	14104374	14.3443	+	ENSMUSG00000026718	Stam
chr2	75668159	75668264	14.3391	+	ENSMUSG00000059005	Hnrnpa3
chr17	6237980	6238085	14.3357	+	ENSMUSG00000034377	Tulp4
chr11	106217765	106217848	14.3351	+	ENSMUSG00000020705	Ddx42
chr2	29151032	29151119	14.3351	+	ENSMUSG00000043535	Setx
chr2	69736310	69736454	14.3351	+	ENSMUSG00000042133	Ppig
chr2	157781863	157781937	14.3351	+	ENSMUSG00000027649	Ctnnbl1
chr10	40389500	40389582	14.3272	+	ENSMUSG00000038481	Cdk19
chr4	55377736	55377812	14.3264	+	ENSMUSG00000028426	Rad23b
chr12	84431994	84432086	14.3248	-	ENSMUSG00000021238	Aldh6a1
chr3	20006597	20006687	14.3248	-	ENSMUSG00000027615	Hps3
chr13	58110403	58110478	14.3224	-	ENSMUSG00000014164	Klhl3
chr4	156242760	156242861	14.3216	+	ENSMUSG00000095567	Noc2l
chr4	43566121	43566213	14.3145	+	ENSMUSG00000028466	Creb3
chr5	123099171	123099248	14.3145	+	ENSMUSG00000054434	Tmem120b
chr3	108431067	108431231	14.3126	-	ENSMUSG00000068739	Sars
chr10	26862580	26862660	14.3118	+	ENSMUSG00000039031	Arhgap18
chr14	55502498	55502565	14.3118	+	ENSMUSG00000022211	Lrrc16b
chr7	143238488	143238555	14.3118	+	ENSMUSG00000009545	Kcnq1
chr9	64585396	64585481	14.3118	+	ENSMUSG00000036466	Megf11
chr12	75567286	75567363	14.3028	-	ENSMUSG00000021051	Ppp2r5e
chr13	51741314	51741431	14.3025	-	ENSMUSG00000021451	Sema4d
chr5	29334635	29334796	14.3025	-	ENSMUSG00000010721	Lmbr1
chr2	26912505	26912603	14.2934	+	ENSMUSG00000062647	Rpl7a
chr13	49344747	49344888	14.2932	+	ENSMUSG00000037933	Bicd2
chr17	66142387	66142465	14.2932	+	ENSMUSG00000035842	Ddx11
chr5	118712192	118712279	14.2932	+	ENSMUSG00000018076	Med13l
chr3	138555599	138555757	14.2868	+	ENSMUSG00000028156	Eif4e
chr13	44926147	44926294	14.2786	-	ENSMUSG00000057531	Dtnbp1
chr15	81925111	81925214	14.2786	-	ENSMUSG00000022476	Polr3h
chr19	15983590	15983686	14.2786	-	ENSMUSG00000041491	Cep78
chr5	128900299	128900371	14.2786	-	ENSMUSG00000029420	Rimbp2
chr5	140428222	140428316	14.2786	+	ENSMUSG00000056076	Eif3b
chr9	47532630	47532766	14.2786	+	ENSMUSG00000032076	Cadm1
chr11	102509129	102509203	14.2755	-	ENSMUSG00000034621	Gpatch8
chr19	6344882	6345119	14.2699	+	ENSMUSG00000024948	Map4k2
chr11	19945830	19945912	14.267	+	ENSMUSG00000045671	Spred2
chr6	143191727	143191847	14.2669	+	ENSMUSG00000030275	Etnk1
chr4	110214480	110214554	14.2508	-	ENSMUSG00000028546	Elavl4
chr10	42323718	42323811	14.2446	-	ENSMUSG00000038302	Lace1
chr12	112908560	112908705	14.2446	-	ENSMUSG00000002799	Jag2
chr7	25785770	25785842	14.2446	-	ENSMUSG00000002602	Axl
chr7	80608673	80608751	14.2446	-	ENSMUSG00000030527	Crtc3
chr7	29998653	29998756	14.2422	+	ENSMUSG00000074221	Zfp568
chr8	71582646	71582765	14.2422	+	ENSMUSG00000031808	Slc27a1
chr19	3792681	3792773	14.2362	+	ENSMUSG00000045098	Suv420h1
chr19	55562116	55562194	14.2362	+	ENSMUSG00000024983	Vti1a
chr2	120612182	120612271	14.2362	+	ENSMUSG00000027285	Haus2
chr2	90578318	90578400	14.2279	-	ENSMUSG00000025314	Ptprj
chr9	65782934	65783010	14.2279	-	ENSMUSG00000040524	Zfp609
chr6	124742807	124742888	14.2229	-	ENSMUSG00000107478	Atn1
chr17	34115507	34115635	14.2126	-	ENSMUSG00000024335	Brd2
chr9	3031981	3032048	14.2088	+	ENSMUSG00000095891	Gm10717
chr11	106771391	106771491	14.2086	-	ENSMUSG00000020718	Polg2
chr3	95069818	95069926	14.2086	-	ENSMUSG00000028126	Pip5k1a
chr6	88015763	88015904	14.2086	-	ENSMUSG00000079477	Rab7
chr1	105549734	105549818	14.2064	-	ENSMUSG00000056536	Pign
chr10	83291740	83291832	14.2064	-	ENSMUSG00000034591	Slc41a2
chr11	106610693	106610779	14.2064	-	ENSMUSG00000040548	Tex2
chr3	104023607	104023695	14.2064	-	ENSMUSG00000052539	Magi3
chr9	64186482	64186689	14.2064	-	ENSMUSG00000004936	Map2k1
chr19	3479112	3479193	14.2003	-	ENSMUSG00000024908	Ppp6r3
chr2	105009285	105009428	14.2003	-	ENSMUSG00000027170	Eif3m
chr1	168426254	168426355	14.2	-	ENSMUSG00000052534	Pbx1
chr13	113614348	113614452	14.2	-	ENSMUSG00000042364	Snx18
chr2	38892606	38892679	14.2	-	ENSMUSG00000063972	Nr6a1
chr9	55465431	55465522	14.2	-	ENSMUSG00000032314	Etfa
chr11	78012843	78013099	14.1997	+	ENSMUSG00000037791	Phf12
chr12	24523598	24523695	14.1997	+	ENSMUSG00000059669	Taf1b
chr14	25513893	25513972	14.1997	+	ENSMUSG00000007817	Zmiz1
chr15	89461869	89461987	14.1997	+	ENSMUSG00000022619	Mapk8ip2
chr1	171275571	171275761	14.1973	+	ENSMUSG00000052423	B4galt3
chr10	70535531	70535613	14.1973	+	ENSMUSG00000043259	Fam13c
chr17	17085196	17085296	14.1973	+	ENSMUSG00000023852	Chd1
chr17	17085196	17085296	14.1973	+	ENSMUSG00000096696	Zfp960
chr17	37073511	37073796	14.191	+	ENSMUSG00000024462	Gabbr1
chr3	104875163	104875292	14.1906	+	ENSMUSG00000045576	St7l
chr8	84692384	84692455	14.1906	+	ENSMUSG00000001909	Trmt1
chr10	56167413	56167480	14.1891	-	ENSMUSG00000038122	Tbc1d32
chr13	23697980	23698079	14.1891	-	ENSMUSG00000060678	Hist1h4c
chr13	21811714	21811835	14.1797	+	ENSMUSG00000069306	Hist1h4m
chr15	41518005	41518076	14.1797	+	ENSMUSG00000022307	Oxr1
chr1	59870666	59870756	14.1743	+	ENSMUSG00000067336	Bmpr2
chr10	62627362	62627467	14.1707	-	ENSMUSG00000020076	Ddx50
chr11	5736680	5736833	14.1707	-	ENSMUSG00000049680	Urgcp
chr11	61153920	61154008	14.1707	-	ENSMUSG00000042506	Usp22
chr4	141696252	141696322	14.1707	-	ENSMUSG00000078515	Ddi2
chr5	115172259	115172672	14.1707	-	ENSMUSG00000029544	Cabp1
chr16	58424345	58424495	14.163	+	ENSMUSG00000035107	Dcbld2
chr5	148958822	148958892	14.1615	-	ENSMUSG00000106892	Gm42791
chr11	4647779	4647878	14.1607	+	ENSMUSG00000020412	Ascc2
chr5	21471583	21471665	14.1607	+	ENSMUSG00000047221	Fam185a
chr15	6796590	6796667	14.1547	+	ENSMUSG00000050310	Rictor
chr2	98662219	98662321	14.1515	+	ENSMUSG00000075015	Gm10801
chr2	24682905	24683094	14.143	-	ENSMUSG00000004113	Cacna1b
chr19	60576361	60576521	14.1387	-	ENSMUSG00000033417	Cacul1
chr1	36706701	36706813	14.131	-	ENSMUSG00000037351	Actr1b
chr16	13577182	13577270	14.1296	-	ENSMUSG00000022685	Parn
chr5	148383792	148383882	14.1296	-	ENSMUSG00000041313	Slc7a1
chr8	79291788	79291871	14.1296	-	ENSMUSG00000037022	Mmaa
chr13	98798369	98798516	14.1214	-	ENSMUSG00000041685	Fcho2
chr19	4554580	4554661	14.1202	+	ENSMUSG00000024892	Pcx
chr8	84635249	84635322	14.1202	+	ENSMUSG00000034656	Cacna1a
chr19	18671657	18671747	14.1192	+	ENSMUSG00000024726	Carnmt1
chr2	163039486	163039583	14.1192	+	ENSMUSG00000017858	Ift52
chr4	74262359	74262438	14.1192	+	ENSMUSG00000028397	Kdm4c
chr4	129821243	129821317	14.1192	+	ENSMUSG00000028788	Ptp4a2
chr15	68175825	68175940	14.1133	-	ENSMUSG00000022335	Zfat
chr18	46239925	46240014	14.1133	-	ENSMUSG00000024477	Pggt1b
chr1	86101038	86101166	14.1114	+	ENSMUSG00000026229	Psmd1
chr17	26731737	26731867	14.1034	+	ENSMUSG00000048249	Crebrf
chr2	6024166	6024248	14.1034	+	ENSMUSG00000043241	Upf2
chr4	32716455	32716616	14.1034	+	ENSMUSG00000058006	Mdn1
chr4	55055177	55055253	14.1034	+	ENSMUSG00000060206	Zfp462
chr4	137502771	137502881	14.1034	+	ENSMUSG00000028763	Hspg2
chr5	32060814	32060889	14.1034	+	ENSMUSG00000052139	Bre
chr8	94626782	94626884	14.1034	+	ENSMUSG00000050079	Rspry1
chr5	113895525	113895830	14.0991	-	ENSMUSG00000004530	Coro1c
chr8	104374025	104374107	14.0991	-	ENSMUSG00000096188	Cmtm4
chr15	88726682	88726813	14.0923	-	ENSMUSG00000022387	Brd1
chr13	103759327	103759435	14.0921	-	ENSMUSG00000032621	Srek1
chr19	3881444	3881526	14.0848	+	ENSMUSG00000024843	Chka
chr2	38628743	38628866	14.0759	-	ENSMUSG00000026750	Psmb7
chr9	86796857	86796983	14.0759	-	ENSMUSG00000033419	Snap91
chr11	75131830	75131907	14.0678	+	ENSMUSG00000038290	Smg6
chr12	8497874	8498038	14.0554	-	ENSMUSG00000054364	Rhob
chr4	155220723	155220930	14.0479	-	ENSMUSG00000029050	Ski
chr16	90498904	90498993	14.0464	+	ENSMUSG00000053414	Hunk
chr3	119123106	119123177	14.0464	+	ENSMUSG00000033308	Dpyd
chr7	127237989	127238087	14.0464	+	ENSMUSG00000045598	Zfp553
chr2	104593508	104593592	14.0459	+	ENSMUSG00000027176	Cstf3
chr5	147505808	147505879	14.0459	+	ENSMUSG00000029647	Pan3
chr10	9767406	9767488	14.043	-	ENSMUSG00000019790	Stxbp5
chr11	59799876	59799945	14.043	-	ENSMUSG00000032633	Flcn
chr11	103388538	103388669	14.043	-	ENSMUSG00000034247	Plekhm1
chr14	121544982	121545071	14.043	-	ENSMUSG00000025558	Dock9
chr6	39810368	39810458	14.043	-	ENSMUSG00000029918	Mrps33
chr7	44882557	44882694	14.043	-	ENSMUSG00000002968	Med25
chr11	44538558	44538684	14.0396	+	ENSMUSG00000019189	Rnf145
chr15	4388215	4388291	14.0396	+	ENSMUSG00000049148	Plcxd3
chr1	163883121	163883208	14.0349	+	ENSMUSG00000026585	Kifap3
chr5	34889426	34889500	14.0349	+	ENSMUSG00000029104	Htt
chr9	22817130	22817216	14.0349	+	ENSMUSG00000035919	Bbs9
chrX	36604994	36605090	14.0349	+	ENSMUSG00000006373	Pgrmc1
chr15	86178644	86178723	14.0192	-	ENSMUSG00000035891	Cerk
chr19	29724529	29724611	14.0192	-	ENSMUSG00000046138	9930021J03Rik
chr4	108695603	108695749	14.0192	-	ENSMUSG00000034557	Zfyve9
chr7	126492548	126492681	14.0192	-	ENSMUSG00000032637	Atxn2l
chr8	13077795	13077868	14.0191	-	ENSMUSG00000038542	Pcid2
chr11	52257879	52258003	14.0148	-	ENSMUSG00000000782	Tcf7
chr9	20934603	20934691	14.0148	-	ENSMUSG00000004099	Dnmt1
chr6	125220029	125220227	14.0128	+	ENSMUSG00000030337	Vamp1
chr3	121775207	121775292	14.0108	-	ENSMUSG00000028127	Abcd3
chr4	126336808	126336897	14.0108	-	ENSMUSG00000028842	Ago3
chr4	135321213	135321331	14.0108	-	ENSMUSG00000028809	Srrm1
chr13	68587443	68587537	14.0106	+	ENSMUSG00000021532	Fastkd3
chr15	100090839	100090927	14.0106	+	ENSMUSG00000023026	Dip2b
chr7	44247850	44247934	14.0106	+	ENSMUSG00000045411	2410002F23Rik
chr18	69527387	69527458	14.0102	+	ENSMUSG00000053477	Tcf4
chr3	138446152	138446223	14.0059	+	ENSMUSG00000028138	Adh5
chr9	59554918	59555001	14.0059	+	ENSMUSG00000025232	Hexa
chr12	8934678	8934855	14.0032	+	ENSMUSG00000020585	Laptm4a
chr6	113121778	113121956	14.0032	+	ENSMUSG00000034269	Setd5
chr16	92060442	92060556	14.0014	+	ENSMUSG00000089774	Slc5a3
chr12	29567719	29567872	13.9955	+	ENSMUSG00000061911	Myt1l
chr19	6448105	6448178	13.9895	+	ENSMUSG00000033768	Nrxn2
chr2	174077187	174077280	13.9895	+	ENSMUSG00000027522	Stx16
chr3	136759568	136759639	13.9895	+	ENSMUSG00000028161	Ppp3ca
chr8	69761269	69761366	13.9832	-	ENSMUSG00000092544	Gm20422
chr8	69761269	69761366	13.9832	-	ENSMUSG00000043090	Zfp866
chr3	152218004	152218092	13.974	+	ENSMUSG00000028034	Fubp1
chr15	77789286	77789385	13.9652	-	ENSMUSG00000022443	Myh9
chr6	118920030	118920202	13.9652	-	ENSMUSG00000051331	Cacna1c
chr11	23399548	23399649	13.9625	+	ENSMUSG00000056342	Usp34
chr4	134823972	134824045	13.9593	-	ENSMUSG00000028826	Tmem57
chrX	74074693	74074769	13.9593	-	ENSMUSG00000031393	Mecp2
chr16	21507509	21507593	13.9563	+	ENSMUSG00000033653	Vps8
chr10	123120380	123120592	13.9475	-	ENSMUSG00000020124	Usp15
chr16	96126263	96126360	13.9439	-	ENSMUSG00000040681	Hmgn1
chr3	30934587	30934670	13.9439	-	ENSMUSG00000037652	Phc3
chr7	45085976	45086053	13.9427	-	ENSMUSG00000019539	Rcn3
chr14	63234574	63234798	13.9417	-	ENSMUSG00000021944	Gata4
chr17	5074242	5074322	13.9384	+	ENSMUSG00000069729	Arid1b
chr6	71561969	71562051	13.9384	+	ENSMUSG00000053119	Chmp3
chr8	11449126	11449267	13.9338	+	ENSMUSG00000031503	Col4a2
chr9	108461599	108461688	13.9338	+	ENSMUSG00000049305	Ccdc71
chr8	33391423	33391504	13.9328	+	ENSMUSG00000049184	Purg
chr2	121773643	121773716	13.9149	-	ENSMUSG00000027238	Frmd5
chr11	120974124	120974271	13.9093	-	ENSMUSG00000025162	Csnk1d
chr1	79733751	79733829	13.9025	-	ENSMUSG00000073643	Wdfy1
chr10	76207840	76207959	13.9025	-	ENSMUSG00000020230	Prmt2
chr19	29348659	29348743	13.9025	-	ENSMUSG00000016495	Plgrkt
chr7	78363059	78363138	13.9025	-	ENSMUSG00000059146	Ntrk3
chr2	27193107	27193216	13.9022	-	ENSMUSG00000009614	Sardh
chr9	96833138	96833275	13.9022	-	ENSMUSG00000043587	Pxylp1
chr5	121757952	121758148	13.9013	+	ENSMUSG00000042605	Atxn2
chr9	66494484	66494581	13.9013	+	ENSMUSG00000038664	Herc1
chr13	93871518	93871617	13.8937	+	ENSMUSG00000042082	Arsb
chr6	5040324	5040391	13.8937	+	ENSMUSG00000032827	Ppp1r9a
chr7	127491707	127491800	13.8937	+	ENSMUSG00000042423	Fbrs
chr8	70255727	70255814	13.8937	+	ENSMUSG00000036054	Sugp2
chr11	119984107	119984196	13.8932	+	ENSMUSG00000025372	Baiap2
chr16	43898336	43898439	13.8932	+	ENSMUSG00000022701	2610015P09Rik
chr17	72928106	72928193	13.8932	+	ENSMUSG00000024063	Lbh
chr3	5751051	5751169	13.8932	+	ENSMUSG00000103034	Gm8797
chr11	61747564	61747656	13.8904	-	ENSMUSG00000020528	Prpsap2
chr1	183205124	183205197	13.8859	-	ENSMUSG00000030768	Disp1
chr10	108252892	108252980	13.8846	+	ENSMUSG00000019907	Ppp1r12a
chr11	54121787	54121871	13.8846	+	ENSMUSG00000018906	P4ha2
chr13	34902533	34902629	13.8846	+	ENSMUSG00000021413	Prpf4b
chrX	77520041	77520148	13.8846	+	ENSMUSG00000025246	Tbl1x
[truncated: 920 more rows]
