# Supplementary material for: CELF RNA binding proteins promote axon regeneration in C. elegans and mammals through alternative splicing of Syntaxins
Source: eLife. 2016 Jun 2;5:e16072. doi: 10.7554/eLife.16072 (PMC4946901; doi:10.7554/eLife.16072)
Supplement: Supplementary file 7. — DOI: http://dx.doi.org/10.7554/eLife.16072.028 [file elife-16072-supp7.xlsx]

## Sheet: Fig 1B unc-75 alleles
wt	unc-75(e950)	unc-75(md1309)	unc-75(md1344)	e950;juEx2919	e950;juEx3031	e950;juSi76	juSi76
55.961	9	12.695	3.678	74.284	40.912	49.45	80.421
59.871	11	25.282	14.228	91.275	51.545	77.317	97.167
62.872	12	27.2	27.34	93.749	89.889	92.656	99.373
70.139	12	29.474	27.426	104.81	99.529	99.162	104.415
73	14	32.664	35.33	111.885	101.543	100.229	108.047
75.979	14	37.592	37.36	133.871	105.927	105.154	114.584
77	15	38.805	38.579	144.246	106.388	110.709	115.107
83.739	16	40.5	43.684	153.756	108.591	115.385	116.915
85.04	17	42.576	46.08	160.747	115.429	117.803	127.515
87.008	19	44.099	47.676	168.093	118.696	127.29	127.763
88.637	19	46.202	49.427	169.217	143.717	129.696	131.063
90.788	20	51.804	49.753	187.916	166.925	155.213	135.584
92.316	21	53.134	49.993	200.798			140.052
94	24	54.11	58.899				148.434
94.261	24		78.479				152.187
96	26		104.505
98.477	28
99	35
100.55	40
101.307	42
104	44
106.852	49
107	50
108.3	53
110.621	54
111.012	54
112.967	58
114.022	115
116
118
118.093
122.451
134.356
142.659
142.881
149
166.575
172.164
199.656

## Sheet: Fig 4A unc-64
wt	unc-64(md130)	md130;Prgef-1-UNC-64A	Prgef-1-UNC-64A	md130;Prgef-1-UNC-64B	Prgef-1-UNC-64B	md130;Prgef-1-UNC-64Î”TM	unc-64(e246)	unc-64(js115);oxEx705	js115;juSi316(Prgef-1-UNC-64A)	js115;juSi316;Pmec-7-nCre	Pmec-7-nCre
50.635	10	64.2	45.304	49.262	38.557	47.539	32.0953	20.049	73.235	34.677	22.872
65.767	15	71	58.557	56.654	40.392	62.66	38.6926	21.461	83.655	60.933	39.546
73.074	25	72	82.571	74.668	41.995	65.112	44.1698	37.496	99.364	61.763	68.955
76.245	28	74	84.418	90.48	74.759	67.265	47.7456	62.562	99.658	68.317	75.718
77.669	29.683	78	86.826	94.834	84.394	68.446	59.8998	72.892	106.125	72.008	91.778
87.778	31	86	87.531	111.081	87.899	72.401	61.8093	75.985	107.869	90.691	94.194
89.123	34.257	93	95.478	116.123	88.427	76.275	62.3419	78.013	110.062	96.77	108.709
89.696	35.952	96	102.74	118.525	96.053	78.739	68.6509	96.299	112.693	104.165	118.67
90.365	37	96	104.464	120.442	99.219	80.974	69.2643	98.732	116.668	104.836	134.893
90.791	39	107	114.826	121.284	99.736	81.678	74.9098	102.617	119.603	127.056	138.919
90.976	42	128	115.746	132.008	101.825	90.927	75.8178	121.204	120.611		141.983
94.221	48	131	121.601	136.879	104.44	91.714	76.3983		125.932		150.429
94.365	52	147	127.764	137.955	118.173		88.3508		141.915
94.703	56	159	128.893	145.27	120.271		94.3231		143.706
100.178	58.331		144.476	146.168	131.348		98.8537		192.229
100.415	64			147.605	133.932		114.538
101.137	66			222.915	160.184
101.589	66.133				170.295
101.798	66.19
103.592	70.27
105.722	74
105.837	74.995
108.719	91.869
111.333	102.187
113.588	104
114.733	120.173
119.017	122.365
123.233
126.272
126.449
127.405
128.81
130.593
131.451
134.669
135.656
137.517
138.036
142.687
144.576
144.906
145.13
145.608
145.946
156.347
163.661
166.673

## Sheet: Fig 5A UNC-64 rescue of unc-75
wt	unc-75(e950)	e950;unc-64-genomic	e950; Prgef-1-UNC-64A	e950;Prgef-1-UNC-64B	e950;Prgef-1-UNC-64deltaTM
63.836	9	22.716	18.748	21.305	12.457
64.396	11	23.401	43.408	29.452	24.425
72.617	12	31.991	45.027	31.605	27.312
72.903	12	36.423	46.323	35.326	31.14
75.613	14	36.491	48.179	38.733	31.682
77.316	14	38.548	52.082	39.303	32.42
77.426	15	38.959	52.312	41.845	34.208
79.018	16	38.986	54	43.21	34.826
83.869	17	41.951	55.445	44.002	36.283
87.99	19	43.528	56.574	45.431	36.522
95.684	19	44.596	59.557	47.342	41.924
99.459	20	44.771	65.557	49.96	42.414
99.605	21	50.788	65.981	55.571	42.539
105.884	24	53.437	69.394	57.82	48.057
109.323	24	54.821	76.296	75.35	51.071
113.228	26	59.563	107.199	77.004	51.75
120.992	28	61	133.51		54.466
123.438	35	67.486			80.147
124.18	40	75.295
137.691	42	80.319
170.005	44	82.673
182.648	49	83.003
	50	89.571
	53	103.287
	54	122.259
	54	135.924
	58
	115

## Sheet: Fig 6A CELF rescue unc-75
wt	unc-75(e950)	e950;Pmec-4-msCELF2	e950;Pmec-4-msCELF4
64.396	9	34.441	28.519
65.767	11	35.503	34.202
72.903	12	39.773	34.921
75.613	12	40.234	39.604
77.426	14	41.612	42.453
77.669	14	46.001	44.408
87.99	15	49.791	45.9
90.791	16	51.031	46.51
94.703	17	54.148	47.251
95.684	19	59.858	54.335
101.137	19	65.598	55.842
101.798	20	66.565	60.048
108.719	21	68.256	75.491
109.323	24	68.42	85.487
113.228	24	72.597
119.017	26	79.247
120.992	28	113.304
127.405	35
128.81	40
131.451	42
135.656	44
144.906	49
145.13	50
170.005	53
	54
	54
	58
	115

## Sheet: Fig 1 supplement 1C
wt	unc-75(e950)	unc-75(e950);Punc-75-UNC-75	unc-75(e950); Punc-75-UNC-75(ΔNLS)
65.2	9	74.284	12.9
70.139	11	91.275	20.9
71.2	12	93.749	29.9
73	12	104.81	30.9
75.979	14	111.885	38.9
77	14	133.871	41.9
85.2	15	144.246	43.9
87.008	16	153.756	48.9
88.637	17	160.747	53.9
90.788	19	168.093	55.9
93.2	19	169.217	61.9
94	20	187.916	63.9
96	21	200.798	70.9
97.2	24		77.9
98.477	24		78.9
99	26		93.9
101.2	28		100.9
101.307	35		140.9
104	40
106.852	42
107	44
108.3	49
110.621	50
114.022	53
116	54
118	54
118.093	58
122.2	115
125.2
125.2
130.2
134.356
142.2
142.2
142.659
146.2
147.2
149
154.2
166.575
172.164
199.656

## Sheet: Fig 1 supplement 3
wt	unc-75(e950)	exc-7(rh252)	unc-75;exc-7	dlk-1(tm4024)	unc-75;dlk-1	dlk-1(tm4024)	unc-75;dlk-1	unc-75;efa-6	Prgef-1-DLK-1(L)	unc-75;Prgef-1-DLK-1(L)
55.961	9	73	10.963	1.306	3.64632	1.306	3.64632	36.826	54.199	4.172
59.871	11	74	12.2	5.719	3.93057	5.719	3.93057	47.248	67.525	13.931
62.872	12	92	19.476	6.739	6.99075	6.739	6.99075	47.947	86.341	21.053
70.139	12	93	21.074	7.203	7.34268	7.203	7.34268	48.211	103.561	23.382
73	14	99	21.1	7.326	9.03342	7.326	9.03342	52.001	113.309	41.313
75.979	14	100	24.603	7.564	9.17591	7.564	9.17591	53.223	138.919	54.716
77	15	105	28.04	8.238	11.7989	8.238	11.7989	54.919	146.886	86.637
83.739	16	106	29.607	8.619	12.4195	8.619	12.4195	57.627	151.258	91.304
85.04	17	116	37.913	10.697	12.7326	10.697	12.7326	62.679	168.486	109.11
87.008	19	122	38.24	13.019	14.2562	13.019	14.2562	63.068	186.391	120.109
88.637	19	126	44.49	13.277	17.4922	13.277	17.4922	79.448	206.57	121.811
90.788	20	135	46.182	16.461	31.6376	16.461	31.6376	85.494		124.206
92.316	21	144	47.412	16.712		16.712		103.525		132.982
94	24		53.839	17.241		17.241		110.473		136.236
94.261	24		62.789	26.193		26.193		124.797		162.412
96	26		90.42
98.477	28
99	35
100.55	40
101.307	42
104	44
106.852	49
107	50
108.3	53
110.621	54
111.012	54
112.967	58
114.022	115
116
118
118.093
122.451
134.356
142.659
142.881
149
166.575
172.164
199.656
