# Supplementary figures and images for: CELF RNA binding proteins promote axon regeneration in C. elegans and mammals through alternative splicing of Syntaxins
Source: eLife journal article supplement (doi:10.7554/elife.16072), 2016-06-02

A

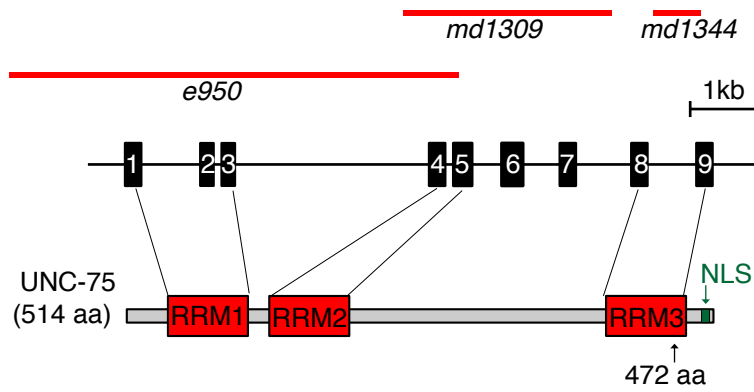

B

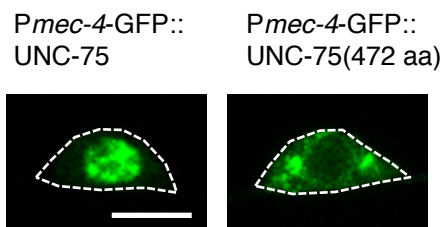

C

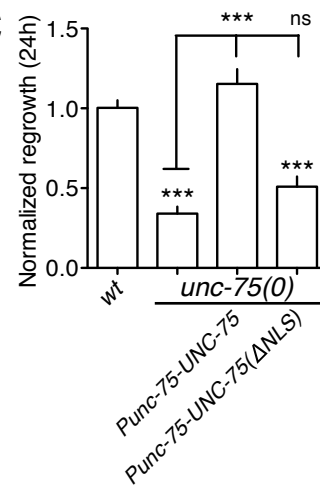

D

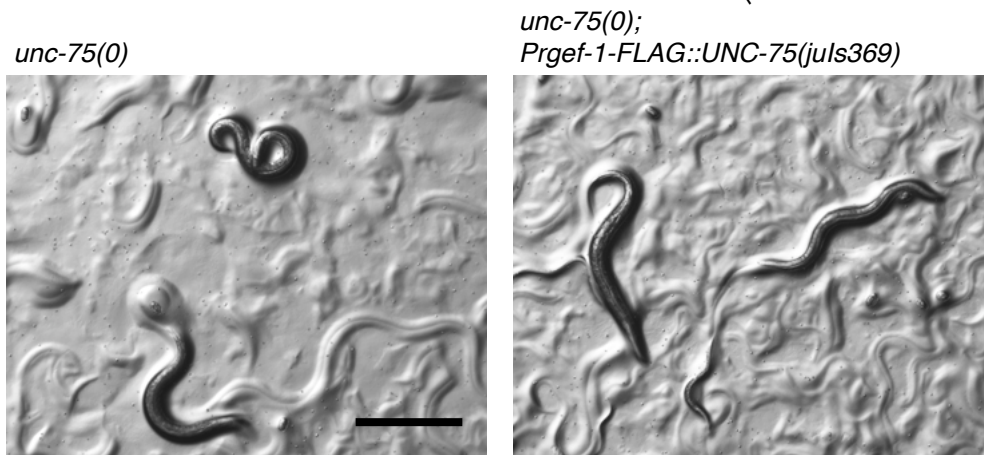

Figure 1- figure supplement 1

Supplement: supp [file elife_poa_e16072_Figure_1_figure_supplement_1.pdf › elife_poa_e16072_Figure_1_figure_supplement_1.pdf]

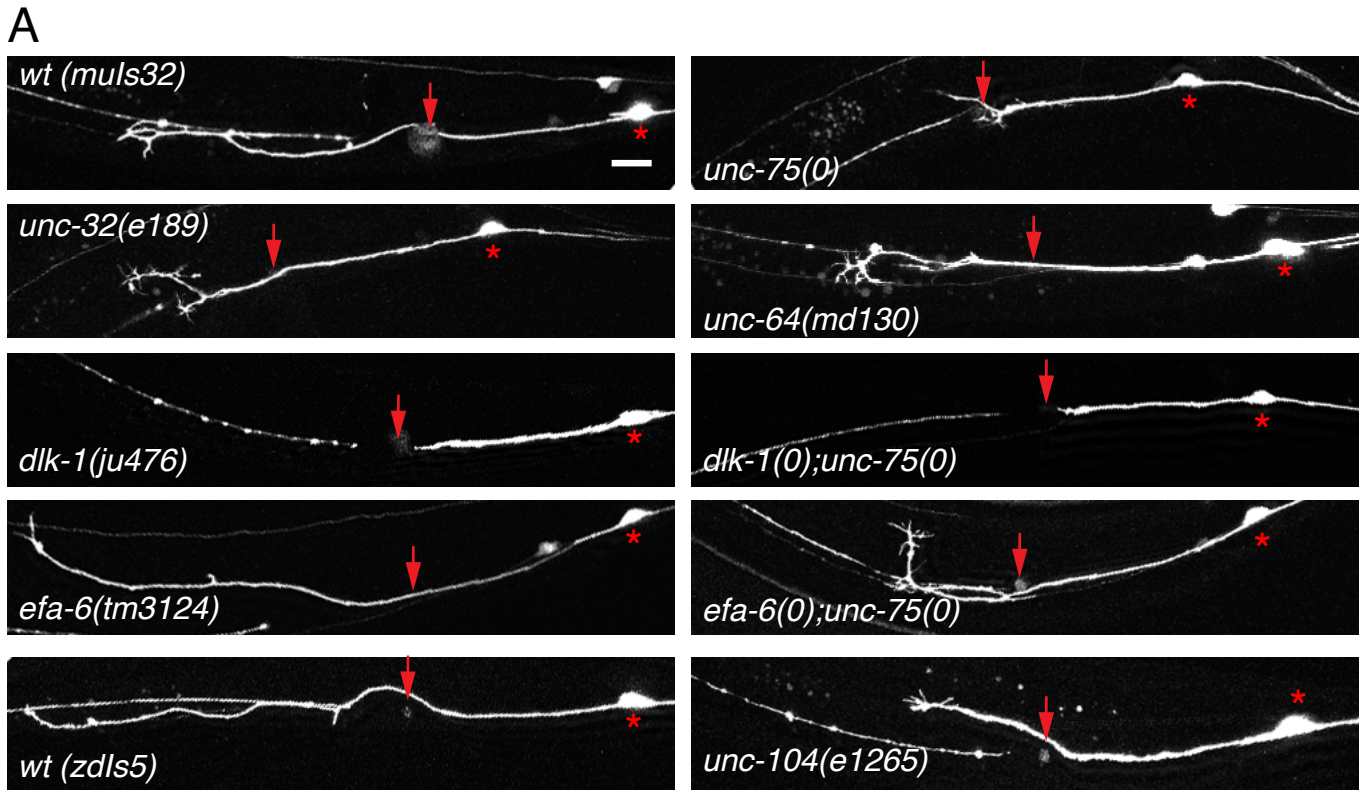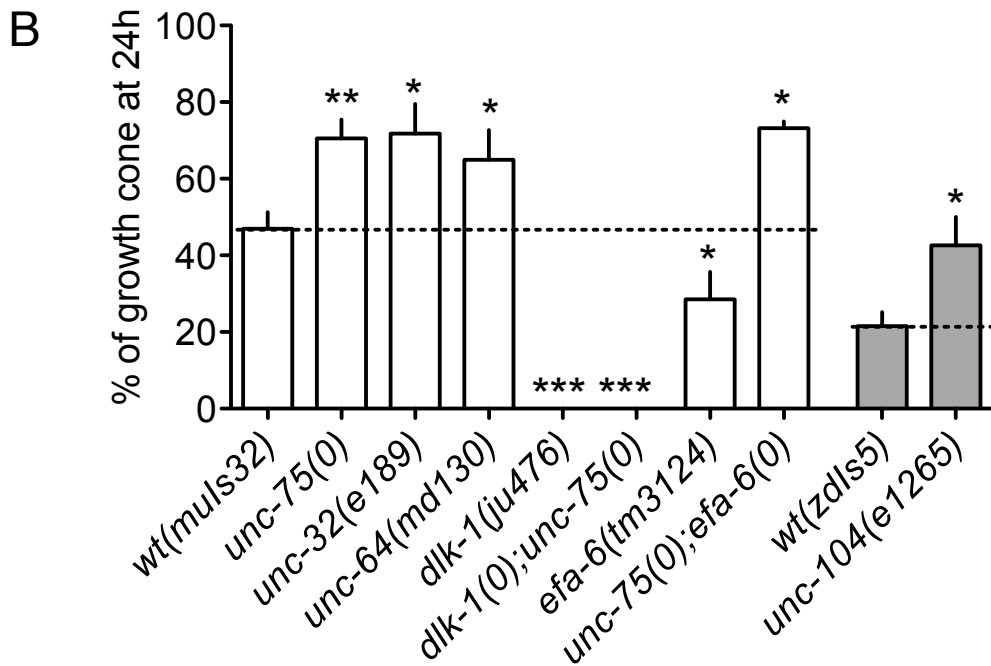

Figure 1-figure supplement 2

Supplement: supp [file elife_poa_e16072_Figure_1_figure_supplement_2.pdf › elife_poa_e16072_Figure_1_figure_supplement_2.pdf]

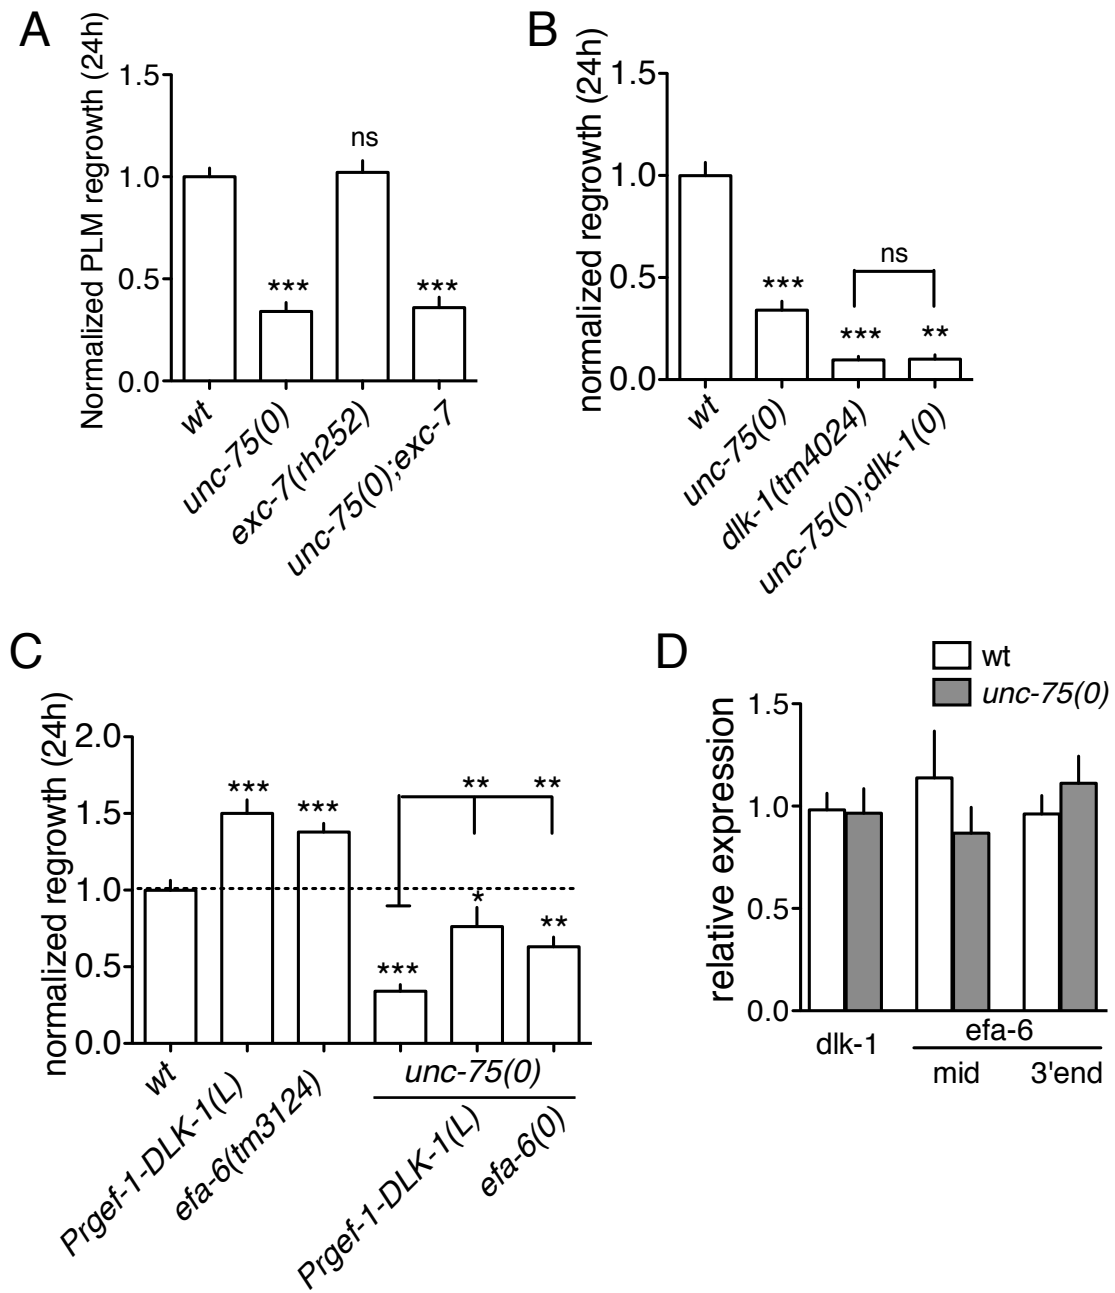

Figure 1- figure supplement 3

Supplement: supp [file elife_poa_e16072_Figure_1_figure_supplement_3.pdf › elife_poa_e16072_Figure_1_figure_supplement_3.pdf]

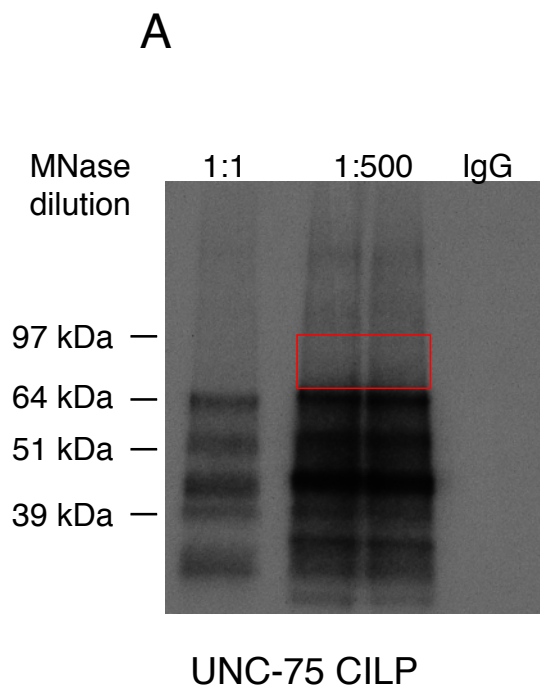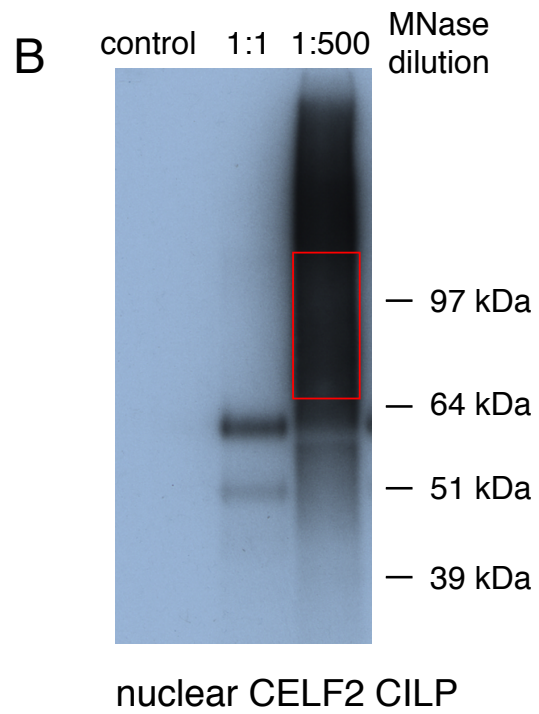

Figure 2- figure supplement 1

Supplement: supp [file elife_poa_e16072_Figure_2_figure_supplement_1.pdf › elife_poa_e16072_Figure_2_figure_supplement_1.pdf]

A

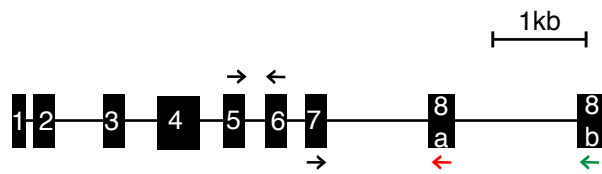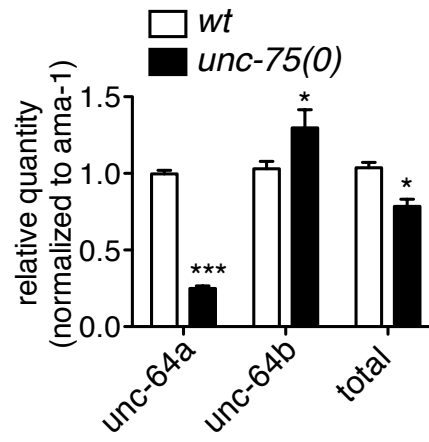

B

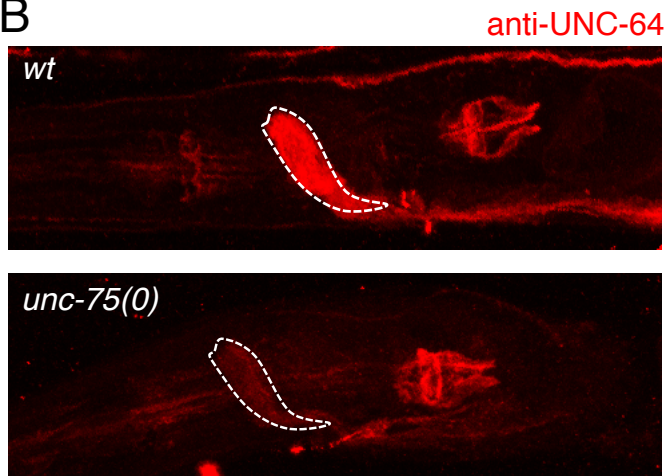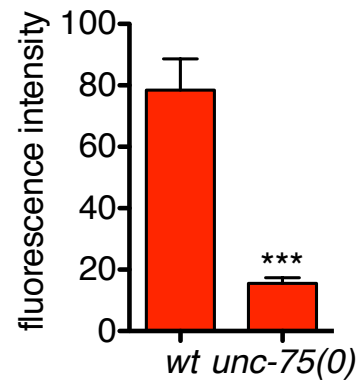

Figure 3- figure supplement 1

Supplement: supp [file elife_poa_e16072_Figure_3_figure_supplement_1.pdf › elife_poa_e16072_Figure_3_figure_supplement_1.pdf]

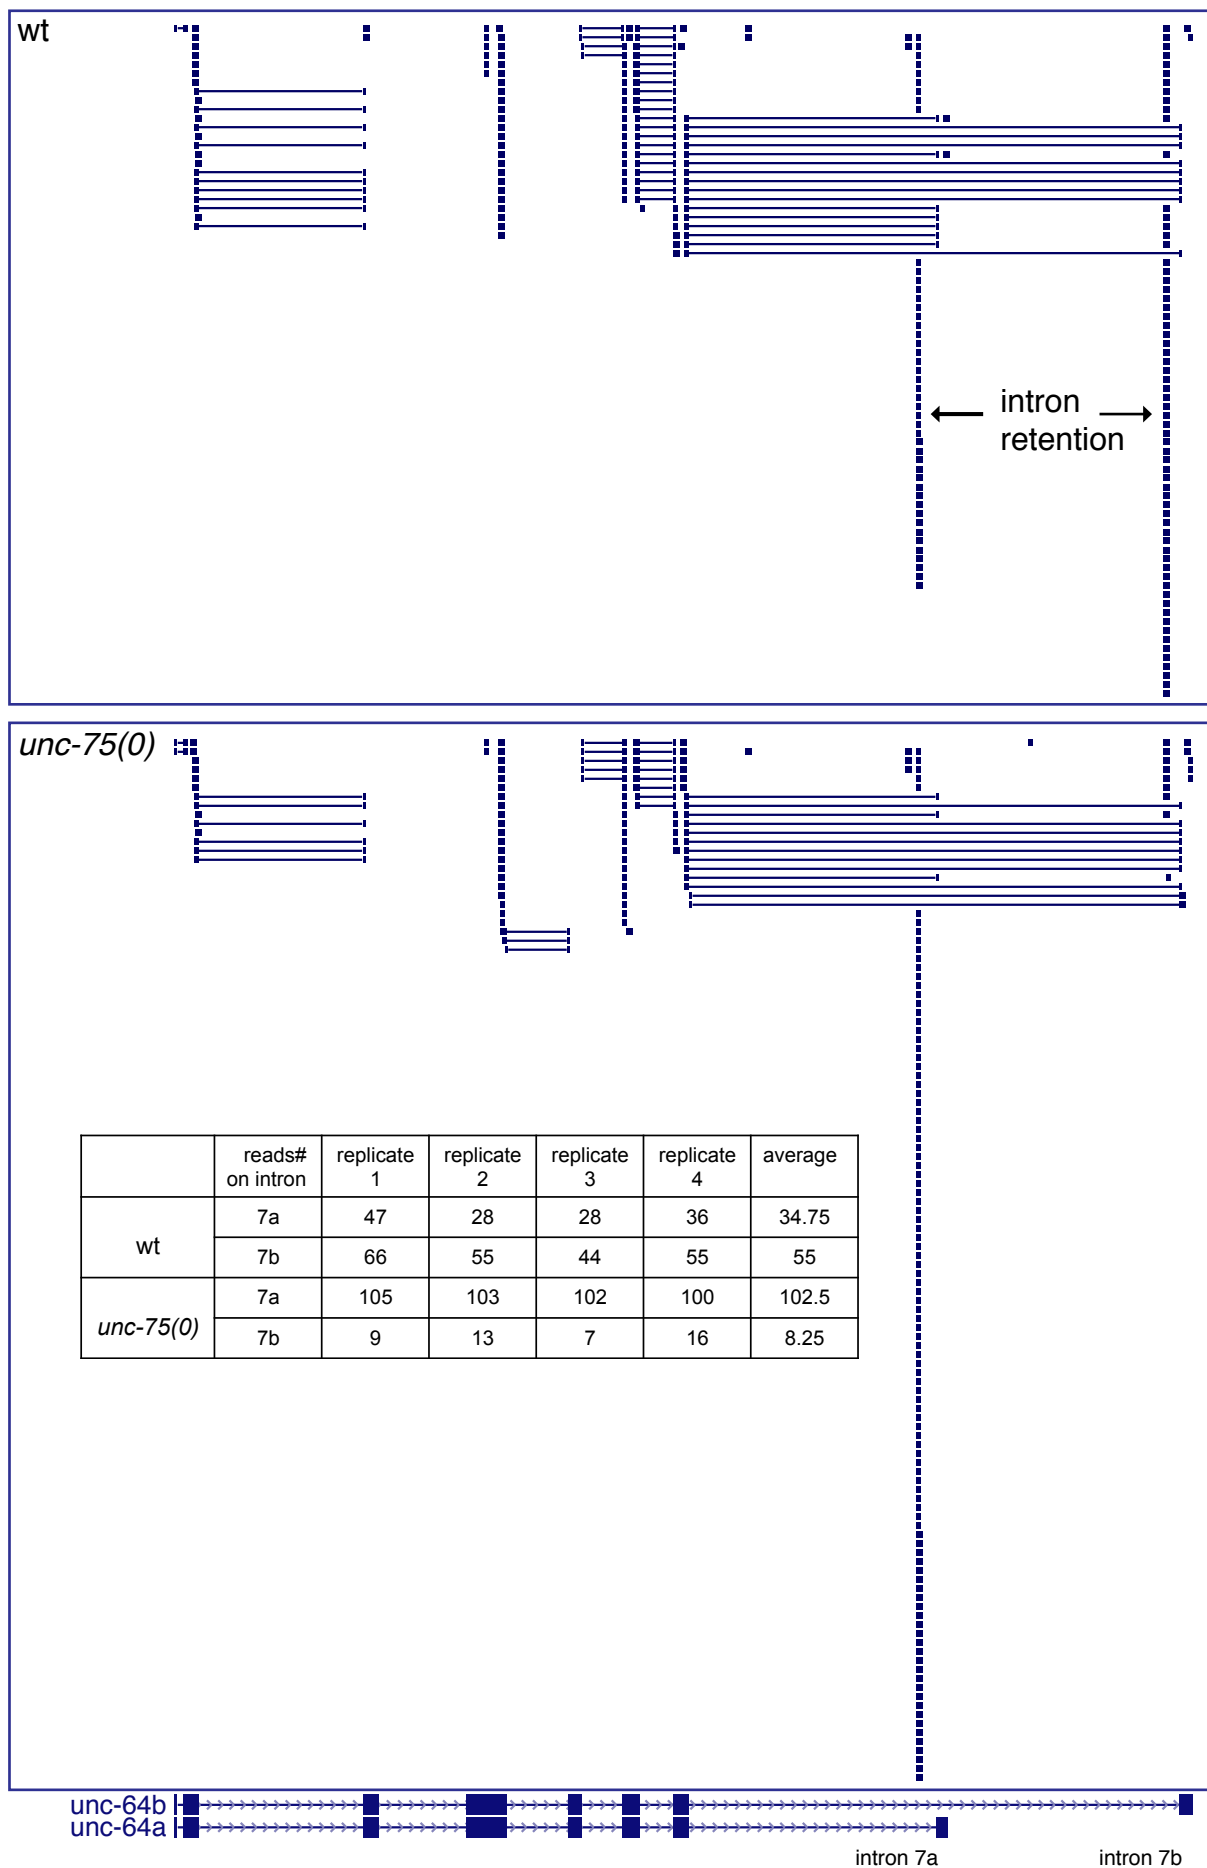

Figure 3- figure supplement 2

Supplement: supp [file elife_poa_e16072_Figure_3_figure_supplement_2.pdf › elife_poa_e16072_Figure_3_figure_supplement_2.pdf]

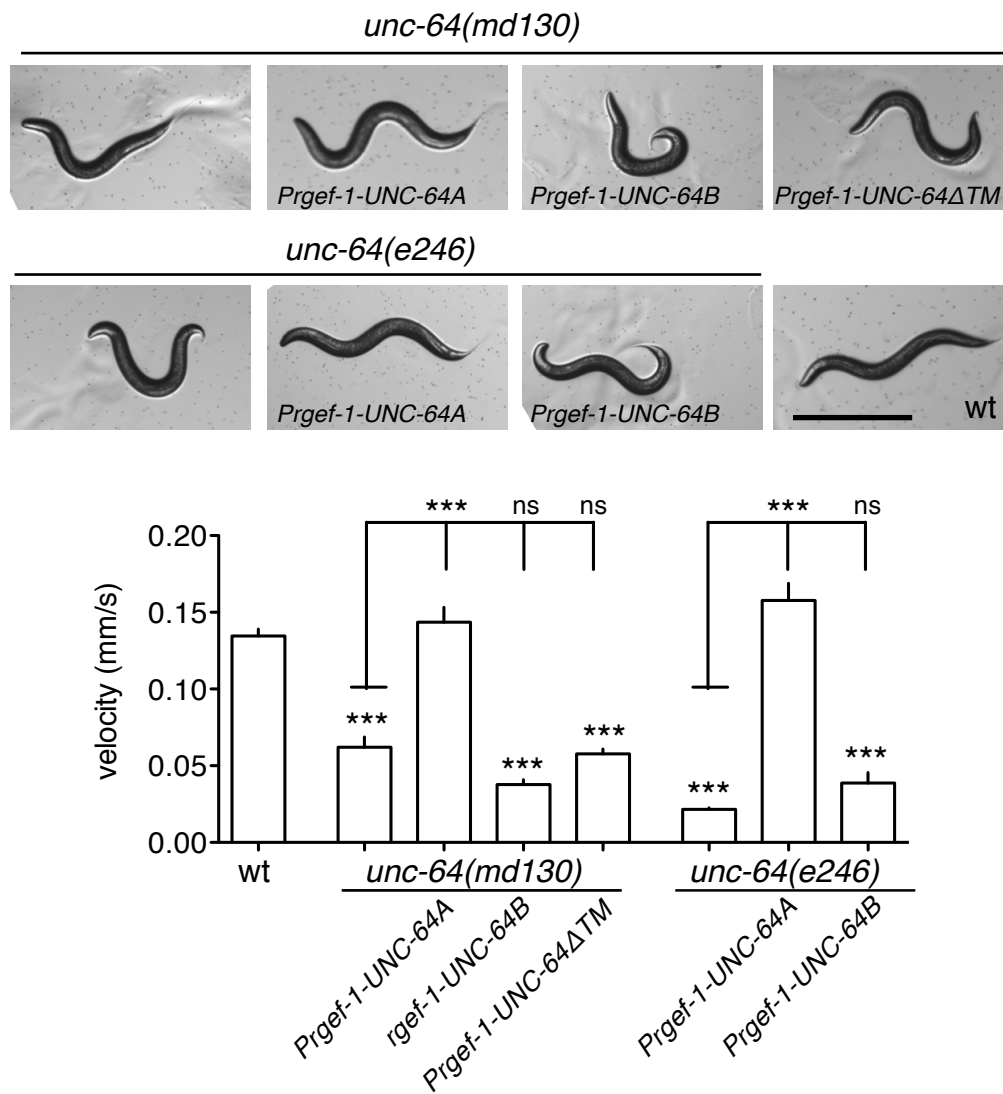

Figure 3- figure supplement 3

Supplement: supp [file elife_poa_e16072_Figure_3_figure_supplement_3.pdf › elife_poa_e16072_Figure_3_figure_supplement_3.pdf]

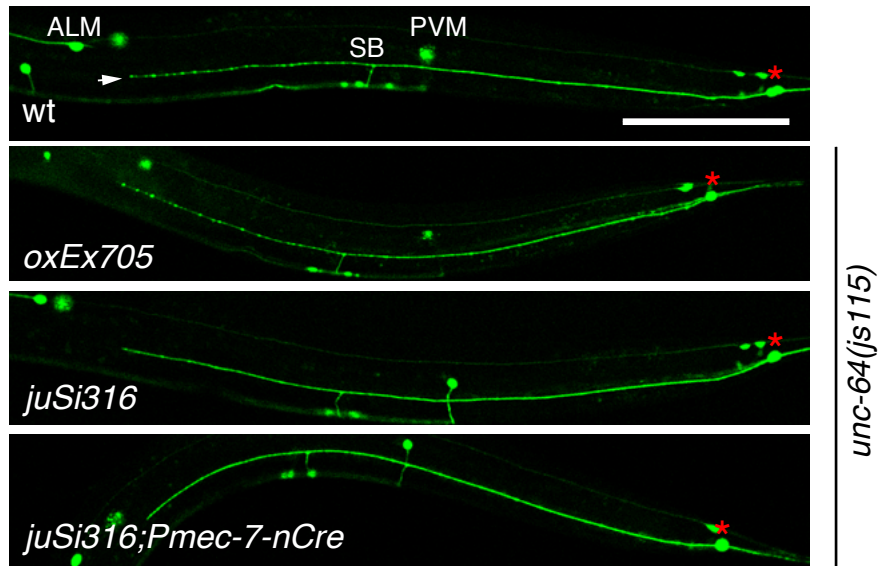

Figure 4-figure supplement 1

Supplement: supp [file elife_poa_e16072_Figure_4_figure_supplement_1.pdf › elife_poa_e16072_Figure_4_figure_supplement_1.pdf]

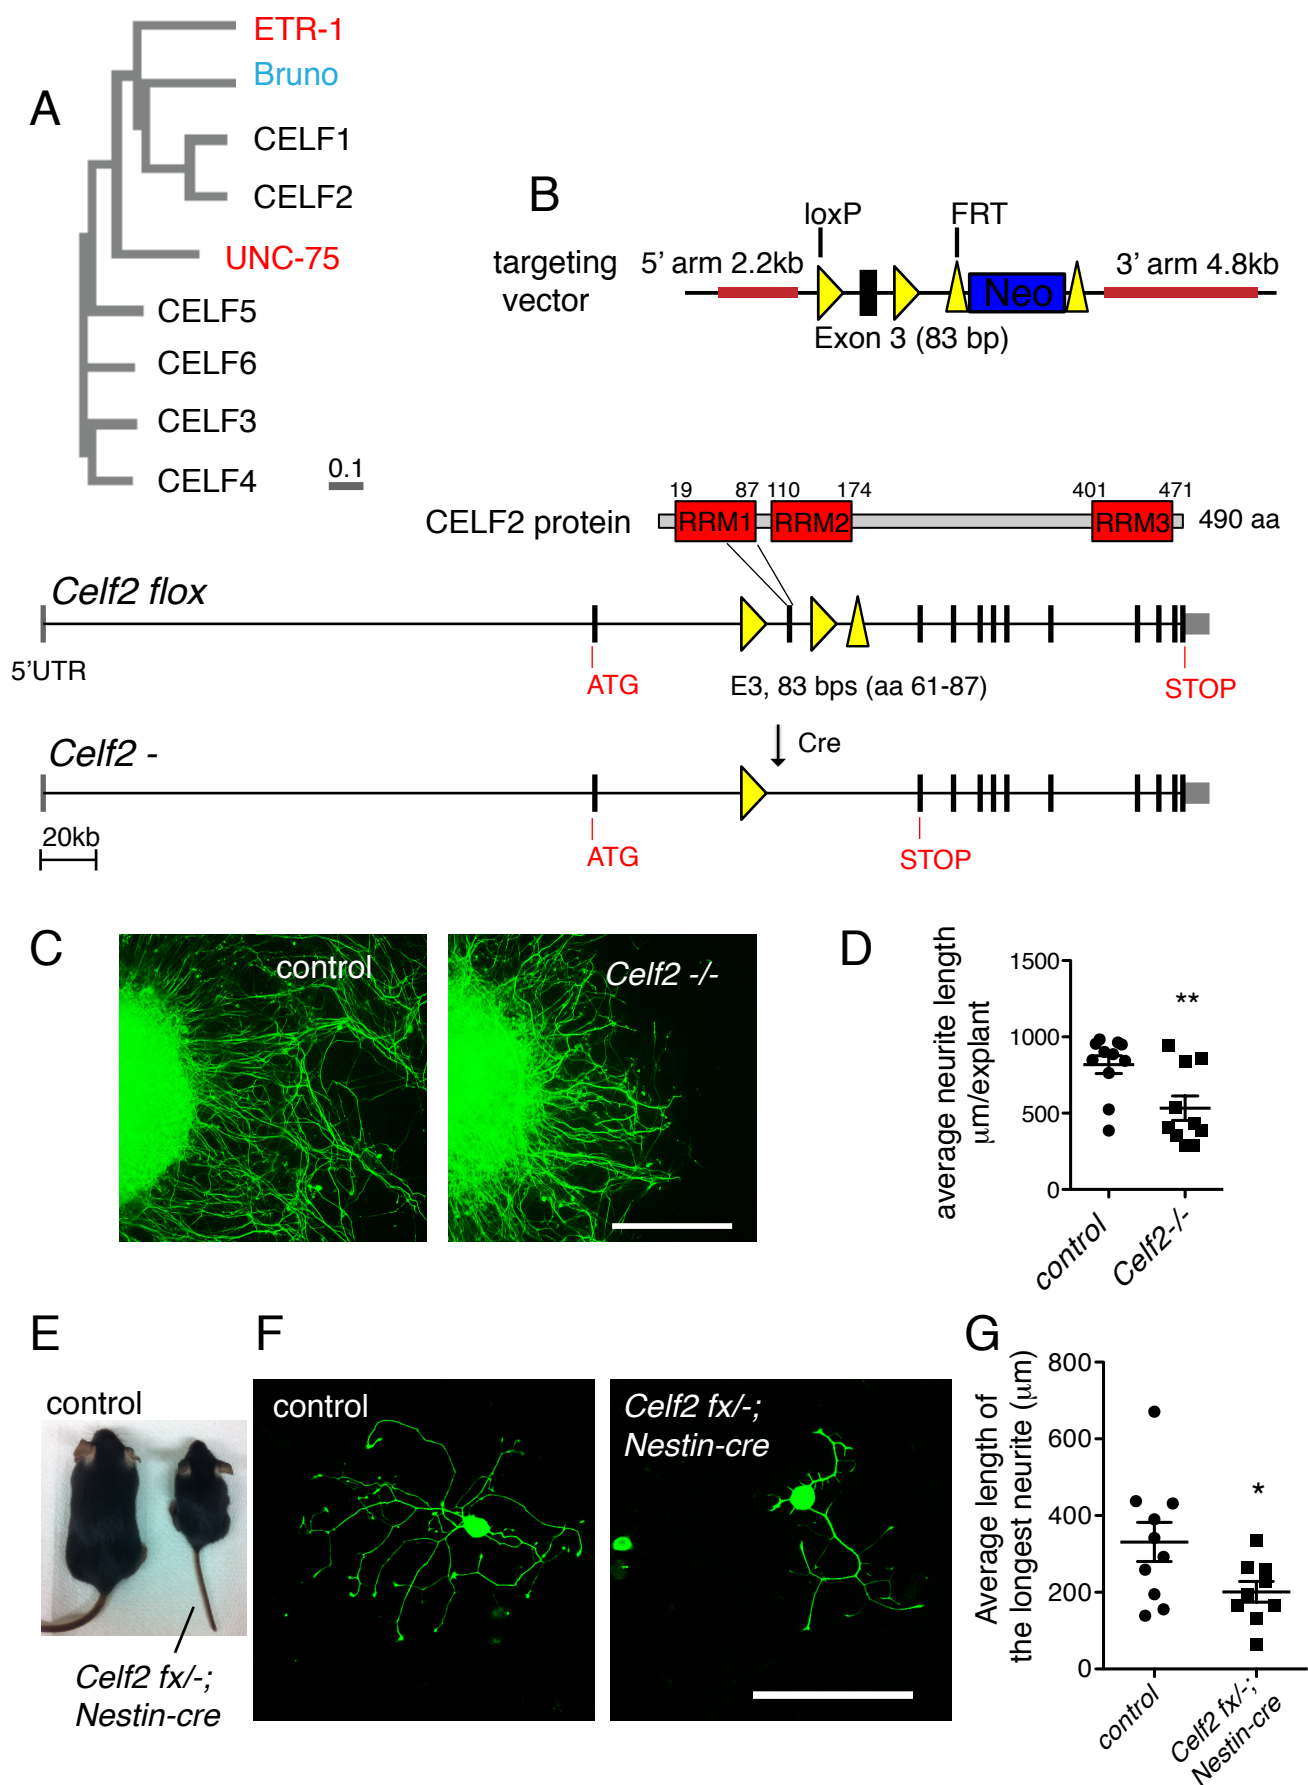

Figure 6- figure supplement 1

Supplement: supp [file elife_poa_e16072_Figure_6_figure_supplement_1.pdf › elife_poa_e16072_Figure_6_figure_supplement_1.pdf]
